# Supplementary material for: Vegetation trends associated with urban development: The role of golf courses
Source: PubMed Central journal article supplement (PMC7001943; doi:10.1371/journal.pone.0228090), 2020-02-05

# PLOS ONE

## Trends in vegetation dynamics associated with urban development: The role of golf courses

--Manuscript Draft--

|                                                                                                                                                                                      |                                                                                                                                                                                                                                                                                                                                                                                                                                                                                                                                                                                                                                                                                                                                                                                                                                                                                                                                                                                                                                                                                                                                                                                                                                                                                                                                                                                                                                                                                                                                                                                                                                                                                                                                                                                                                                                                                                                                                                                                                                                    |
|--------------------------------------------------------------------------------------------------------------------------------------------------------------------------------------|----------------------------------------------------------------------------------------------------------------------------------------------------------------------------------------------------------------------------------------------------------------------------------------------------------------------------------------------------------------------------------------------------------------------------------------------------------------------------------------------------------------------------------------------------------------------------------------------------------------------------------------------------------------------------------------------------------------------------------------------------------------------------------------------------------------------------------------------------------------------------------------------------------------------------------------------------------------------------------------------------------------------------------------------------------------------------------------------------------------------------------------------------------------------------------------------------------------------------------------------------------------------------------------------------------------------------------------------------------------------------------------------------------------------------------------------------------------------------------------------------------------------------------------------------------------------------------------------------------------------------------------------------------------------------------------------------------------------------------------------------------------------------------------------------------------------------------------------------------------------------------------------------------------------------------------------------------------------------------------------------------------------------------------------------|
| <b>Manuscript Number:</b>                                                                                                                                                            | PONE-D-19-19510                                                                                                                                                                                                                                                                                                                                                                                                                                                                                                                                                                                                                                                                                                                                                                                                                                                                                                                                                                                                                                                                                                                                                                                                                                                                                                                                                                                                                                                                                                                                                                                                                                                                                                                                                                                                                                                                                                                                                                                                                                    |
| <b>Article Type:</b>                                                                                                                                                                 | Research Article                                                                                                                                                                                                                                                                                                                                                                                                                                                                                                                                                                                                                                                                                                                                                                                                                                                                                                                                                                                                                                                                                                                                                                                                                                                                                                                                                                                                                                                                                                                                                                                                                                                                                                                                                                                                                                                                                                                                                                                                                                   |
| <b>Full Title:</b>                                                                                                                                                                   | Trends in vegetation dynamics associated with urban development: The role of golf courses                                                                                                                                                                                                                                                                                                                                                                                                                                                                                                                                                                                                                                                                                                                                                                                                                                                                                                                                                                                                                                                                                                                                                                                                                                                                                                                                                                                                                                                                                                                                                                                                                                                                                                                                                                                                                                                                                                                                                          |
| <b>Short Title:</b>                                                                                                                                                                  | Urban development and the role of golf courses                                                                                                                                                                                                                                                                                                                                                                                                                                                                                                                                                                                                                                                                                                                                                                                                                                                                                                                                                                                                                                                                                                                                                                                                                                                                                                                                                                                                                                                                                                                                                                                                                                                                                                                                                                                                                                                                                                                                                                                                     |
| <b>Corresponding Author:</b>                                                                                                                                                         | Thu T Nguyen<br>Vietnam National University of Forestry<br>Ha Noi, VIET NAM                                                                                                                                                                                                                                                                                                                                                                                                                                                                                                                                                                                                                                                                                                                                                                                                                                                                                                                                                                                                                                                                                                                                                                                                                                                                                                                                                                                                                                                                                                                                                                                                                                                                                                                                                                                                                                                                                                                                                                        |
| <b>Keywords:</b>                                                                                                                                                                     | Urban ecosystems, vegetation change, biodiversity connectivity, biodiversity hotspot, golf courses, remote sensing                                                                                                                                                                                                                                                                                                                                                                                                                                                                                                                                                                                                                                                                                                                                                                                                                                                                                                                                                                                                                                                                                                                                                                                                                                                                                                                                                                                                                                                                                                                                                                                                                                                                                                                                                                                                                                                                                                                                 |
| <b>Abstract:</b>                                                                                                                                                                     | <p>Globally, cities have grown rapidly in size and density and this has caused profound impacts on urban forest ecosystems. Urbanization requiring clearing of vegetation reduces ecosystem services that benefit both city dwellers and biodiversity. Understanding spatial and temporal patterns of vegetation changes associated with urbanization is vital for future sustainable urban development. We used Landsat time series data for the period 1988 to 2018 to characterize changes in vegetation cover and habitat connectivity in the Perth Metropolitan Area, a rapidly urbanising biodiversity hotspot, as a case study to understand the impacts of urbanization on urban forests. Moreover, as golf courses are rapidly increasing in many urban areas, we assessed the role of golf courses in maintaining vegetation cover and creating habitat connectivity. We employed (1) land use classification, post-classification change detection, and (2) Morphological Spatial Pattern Analysis (MSPA). Over 17,000 hectares of vegetation were cleared and the area of vegetation contributing to biodiversity connectivity was reduced significantly over the three decades. The spatial patterns of vegetation loss and gain were different in each of the three decades reflecting the implementation of urban planning. Furthermore, MSPA analysis showed that the reduction in vegetation cover led to habitat fragmentation with a significant decrease in the core and bridge classes and an increase in isolated patches in the urban landscape. Golf courses played a useful role in maintaining vegetation cover and contributing to connectivity in a regional biodiversity hotspot. Our findings suggest that urban planning needs to more carefully consider land clearing and its impacts on connectivity in the landscape. Moreover, there is a need to take into consideration opportunities for off-reserve conservation in smaller habitat fragments such as in golf courses in sustainable urban management.</p> |
| <b>Order of Authors:</b>                                                                                                                                                             | <p>Thu Thi Nguyen</p> <p>Paul Barber</p> <p>Richard Harper</p> <p>Tran Vu Khanh Linh</p> <p>Bernard Dell</p>                                                                                                                                                                                                                                                                                                                                                                                                                                                                                                                                                                                                                                                                                                                                                                                                                                                                                                                                                                                                                                                                                                                                                                                                                                                                                                                                                                                                                                                                                                                                                                                                                                                                                                                                                                                                                                                                                                                                       |
| <b>Additional Information:</b>                                                                                                                                                       |                                                                                                                                                                                                                                                                                                                                                                                                                                                                                                                                                                                                                                                                                                                                                                                                                                                                                                                                                                                                                                                                                                                                                                                                                                                                                                                                                                                                                                                                                                                                                                                                                                                                                                                                                                                                                                                                                                                                                                                                                                                    |
| <b>Question</b>                                                                                                                                                                      | <b>Response</b>                                                                                                                                                                                                                                                                                                                                                                                                                                                                                                                                                                                                                                                                                                                                                                                                                                                                                                                                                                                                                                                                                                                                                                                                                                                                                                                                                                                                                                                                                                                                                                                                                                                                                                                                                                                                                                                                                                                                                                                                                                    |
| <b>Financial Disclosure</b>                                                                                                                                                          | TTN received PhD scholarship co-funded by Vietnam and Murdoch University.                                                                                                                                                                                                                                                                                                                                                                                                                                                                                                                                                                                                                                                                                                                                                                                                                                                                                                                                                                                                                                                                                                                                                                                                                                                                                                                                                                                                                                                                                                                                                                                                                                                                                                                                                                                                                                                                                                                                                                          |
| Enter a financial disclosure statement that describes the sources of funding for the work included in this submission. Review the <a href="#">submission guidelines</a> for detailed |                                                                                                                                                                                                                                                                                                                                                                                                                                                                                                                                                                                                                                                                                                                                                                                                                                                                                                                                                                                                                                                                                                                                                                                                                                                                                                                                                                                                                                                                                                                                                                                                                                                                                                                                                                                                                                                                                                                                                                                                                                                    |

requirements. View published research articles from [PLOS ONE](#) for specific examples.

This statement is required for submission and **will appear in the published article** if the submission is accepted. Please make sure it is accurate.

#### Unfunded studies

Enter: *The author(s) received no specific funding for this work.*

#### Funded studies

Enter a statement with the following details:

- Initials of the authors who received each award
- Grant numbers awarded to each author
- The full name of each funder
- URL of each funder website
- Did the sponsors or funders play any role in the study design, data collection and analysis, decision to publish, or preparation of the manuscript?
- **NO** - Include this sentence at the end of your statement: *The funders had no role in study design, data collection and analysis, decision to publish, or preparation of the manuscript.*
- **YES** - Specify the role(s) played.

\* typeset

#### Competing Interests

Use the instructions below to enter a competing interest statement for this submission. On behalf of all authors, disclose any [competing interests](#) that could be perceived to bias this work—acknowledging all financial support and any other relevant financial or non-financial competing interests.

This statement **will appear in the published article** if the submission is accepted. Please make sure it is accurate. View published research articles from [PLOS ONE](#) for specific examples.

The authors have declared that no competing interests exist.

**NO authors have competing interests**

Enter: *The authors have declared that no competing interests exist.*

**Authors with competing interests**

Enter competing interest details beginning with this statement:

*I have read the journal's policy and the authors of this manuscript have the following competing interests: [insert competing interests here]*

\* typeset

**Ethics Statement**

Enter an ethics statement for this submission. This statement is required if the study involved:

- Human participants
- Human specimens or tissue
- Vertebrate animals or cephalopods
- Vertebrate embryos or tissues
- Field research

Write "N/A" if the submission does not require an ethics statement.

General guidance is provided below. Consult the [submission guidelines](#) for detailed instructions. **Make sure that all information entered here is included in the Methods section of the manuscript.**

No ethics approval required for the project.

**Format for specific study types**

**Human Subject Research (involving human participants and/or tissue)**

- Give the name of the institutional review board or ethics committee that approved the study
- Include the approval number and/or a statement indicating approval of this research
- Indicate the form of consent obtained (written/oral) or the reason that consent was not obtained (e.g. the data were analyzed anonymously)

**Animal Research (involving vertebrate animals, embryos or tissues)**

- Provide the name of the Institutional Animal Care and Use Committee (IACUC) or other relevant ethics board that reviewed the study protocol, and indicate whether they approved this research or granted a formal waiver of ethical approval
- Include an approval number if one was obtained
- If the study involved *non-human primates*, add *additional details* about animal welfare and steps taken to ameliorate suffering
- If anesthesia, euthanasia, or any kind of animal sacrifice is part of the study, include briefly which substances and/or methods were applied

**Field Research**

Include the following details if this study involves the collection of plant, animal, or other materials from a natural setting:

- Field permit number
- Name of the institution or relevant body that granted permission

**Data Availability**

Authors are required to make all data underlying the findings described fully available, without restriction, and from the time of publication. PLOS allows rare exceptions to address legal and ethical concerns. See the [PLOS Data Policy](#) and [FAQ](#) for detailed information.

Yes - all data are fully available without restriction

A Data Availability Statement describing where the data can be found is required at submission. Your answers to this question constitute the Data Availability Statement and **will be published in the article**, if accepted.

**Important:** Stating 'data available on request from the author' is not sufficient. If your data are only available upon request, select 'No' for the first question and explain your exceptional situation in the text box.

Do the authors confirm that all data underlying the findings described in their manuscript are fully available without restriction?

**Describe where the data may be found in full sentences. If you are copying our sample text, replace any instances of XXX with the appropriate details.**

- If the data are **held or will be held in a public repository**, include URLs, accession numbers or DOIs. If this information will only be available after acceptance, indicate this by ticking the box below. For example: *All XXX files are available from the XXX database (accession number(s) XXX, XXX).*
- If the data are all contained **within the manuscript and/or Supporting Information files**, enter the following: *All relevant data are within the manuscript and its Supporting Information files.*
- If neither of these applies but you are able to provide **details of access elsewhere**, with or without limitations, please do so. For example:

*Data cannot be shared publicly because of [XXX]. Data are available from the XXX Institutional Data Access / Ethics Committee (contact via XXX) for researchers who meet the criteria for access to confidential data.*

*The data underlying the results presented in the study are available from (include the name of the third party*

All relevant data are within the manuscript

*and contact information or URL).*

- This text is appropriate if the data are owned by a third party and authors do not have permission to share the data.

\* typeset

Additional data availability information:

# Trends in vegetation dynamics associated with urban development: The role of golf courses

Thu Thi Nguyen<sup>1,3\*</sup>, Paul Barber<sup>2,3</sup>, Richard Harper<sup>3</sup>, Tran Vu Khanh Linh<sup>4</sup>,  
Bernard Dell<sup>3</sup>

<sup>1</sup> Vietnam National University of Forestry (VNUF), Xuan Mai, Chuong My, Ha Noi, Vietnam,

<sup>2</sup> ArborCarbon Pty Ltd, 1 City Farm Place, East Perth, WA 6004, Australia,

<sup>3</sup> Agricultural and Forestry Sciences, Murdoch University, Murdoch, WA 6150, Australia,

<sup>4</sup> Faculty of Forestry, Nong Lam University - Ho Chi Minh City, Thu Duc District, Ho Chi Minh City, Vietnam.

\*Corresponding author

Emails: [Thu.Nguyen@murdoch.edu.au](mailto:Thu.Nguyen@murdoch.edu.au); thu.nguyen.2k14@gmail.com

## Abstract

Globally, cities have grown rapidly in size and density and this has caused profound impacts on urban forest ecosystems. Urbanization requiring clearing of vegetation reduces ecosystem services that benefit both city dwellers and biodiversity. Understanding spatial and temporal patterns of vegetation changes associated with urbanization is vital for future sustainable urban development. We used **Landsat** time series data for the period 1988 to 2018 to characterize changes in vegetation cover and habitat connectivity in the Perth Metropolitan Area, a rapidly urbanising biodiversity hotspot, as a case study to understand the impacts of urbanization on urban forests. Moreover, as golf courses are rapidly increasing in many urban areas, we assessed the role of golf courses in maintaining vegetation cover and creating habitat connectivity. We employed (1) land use classification, post-classification change detection, and (2) Morphological Spatial Pattern Analysis (MSPA). Over 17,000 hectares of vegetation were cleared and the area of vegetation contributing to biodiversity connectivity was reduced significantly over the three **decades**. The spatial patterns of vegetation loss and gain were different in each of **the three decades** reflecting the implementation of urban planning. Furthermore, MSPA analysis showed that the reduction in vegetation cover led to habitat fragmentation with a significant decrease in the core and bridge classes and an increase in isolated patches in the urban landscape. Golf courses played a useful role in **maintaining vegetation cover and contributing to connectivity in a regional biodiversity hotspot**. Our findings suggest that urban planning needs to more carefully consider land clearing and its impacts on connectivity in the landscape. Moreover, there is a need to take into consideration opportunities for off-reserve conservation in smaller habitat fragments such as in golf courses in sustainable urban management.

## 36 **Introduction**

37 Globally, cities have grown rapidly in number and size over recent decades [1, 2]. This trend  
38 is predicted to continue as urban areas are expected to absorb most of the global population  
39 growth [3] . While the process of urbanization presents key implications for changes in  
40 physical landscapes and demographic characteristics, it can cause profound impacts on  
41 environmental components, especially on urban forest ecosystems [4, 5].

42 Vegetation in urban landscapes is critically important because it can provide goods and  
43 services, and full ecosystem functions that benefit city dwellers and the environment. On the  
44 one hand, a remarkable range of human well-being benefits are delivered from urban green  
45 spaces including mitigating the urban heat island (UHI) effect which is a threat to human  
46 health [6, 7]; reducing stress [8], risk of poor mental health [9] and mortality from  
47 cardiovascular disease [10]; and improving healing times [11], self-esteem and empowerment  
48 [12], and cognitive ability [13]. On the other hand, urban green spaces provide various  
49 ecosystem services such as strengthening resistance to natural disasters [14], promoting  
50 biological processes such as pollination [15], and reducing surface erosion from stormwater  
51 runoff [16]. The amount of vegetation in cities strongly influences biodiversity, especially  
52 where vegetation is set aside during the process of urbanization [17]. However, if species  
53 dispersal and exchange among these patches is insufficient to allow gene flow and diversity,  
54 loss of regional biodiversity is inevitable [18]. Therefore, urban development that requires  
55 clearing of vegetation causes reduction in vegetation cover, habitat loss and fragmentation, and  
56 hence may be considered a threat to biodiversity [17, 19].

57 Urban conservation strategies must therefore consider not only the size and quality of habitat  
58 reserves, but the connectivity in the intervening urban matrix [19]. While the need to protect  
59 large habitat reserves is obvious, opportunities for off-reserve conservation of smaller habitat  
60 fragments should not be overlooked [20]. Understanding spatial and temporal patterns of  
61 vegetation change associated with urbanization, as well as opportunities for the preservation  
62 of green spaces outside natural reserves, is vital for future sustainable urban development  
63 especially in areas of global ecological importance.

64 As the number of golf courses is rapidly increasing in many urban areas worldwide [21], there  
65 have been many environmental arguments about this green space category in urban landscapes.



66 Golf courses are considered to be major polluters of the environment through pesticide and  
67 fertilizer use [22]. However, golf courses in urban settings create large green-area habitats,  
68 which even surpass many nature reserves in size [23]. Potentially, urban golf courses could  
69 become more purposeful areas for biodiversity conservation and the provision of ecosystem  
70 services in cities [24]. Previous studies have identified some of the biological values of golf  
71 courses, such as providing refuge habitats for urban-avoiding wildlife [23, 25, 26].  
72 Nevertheless, little research has been undertaken to comprehensively assess the role of golf  
73 courses in maintaining vegetation patches as interconnected nodes in urban landscapes during  
74 a long period of urban development where vegetation clearing was significant.

75 Vegetation clearing for urban expansion can occur gradually over multiple years. Satellite-  
76 based remote sensing holds certain advantages in the characterization of these changes in urban  
77 landscapes because of the large spatial coverage, high time resolution, and wide availability of  
78 data [27]. Landsat images of medium-resolution allow for mapping urban areas at a large  
79 spatial scale [28]. Many methods have been used to detect, monitor and quantify vegetation  
80 changes, but differences in vegetation index and land use classification are the most widely  
81 used methods for vegetation change over a long period of time [28]. A great number of  
82 vegetation indices have been proposed, ranging from very simple to very complex band  
83 combinations [29]. The most widely-used vegetation index is the Normalized Difference  
84 Vegetation Index (NDVI) [29] which separates green vegetation from other surfaces based on  
85 the ability of chlorophyll to absorb red light for photosynthesis and reflect the near-infrared  
86 (NIR) wavelengths . Furthermore, information on vegetation cover dynamics can be combined  
87 with Morphological Spatial Pattern Analysis (MSPA) to describe the spatial configuration of  
88 the ecosystem at the pixel level, making it possible to detect temporal changes in the structural  
89 connectivity of habitats in urban settings [30].

90 Therefore, to enhance the understanding of vegetation dynamics associated with urbanization  
91 and the role of golf courses in maintaining urban forests, we used Landsat imagery to map  
92 vegetation cover and to assess its spatial and temporal distribution over three decades from  
93 1988 to 2018. Then, maps of vegetation cover were used for MSPA analysis to detect changes  
94 in habitat connectivity. We chose the Perth Metropolitan area for the study as it lies within a  
95 rapidly urbanizing biodiversity hotspot in Australia. The three primary research objectives

96 were to: (1) determine the spatial and temporal patterns of vegetation clearing in urbanization;  
97 (2) evaluate the spatial and temporal patterns of green landscape connectivity; and (3) assess  
98 the impact of golf courses on preserving green spaces in an urban landscape. This analysis will  
99 provide a useful perspective on the land-use pressure facing vegetation remnants in the region  
100 and their connectivity in the Southwest Australia Ecoregion (SWAE) which is recognised as  
101 one of 35 international biodiversity hotspots, and is home to over 1500 plant species with a  
102 high degree of endemism [31].

## 103 **Methods**

### 104 **Study area**

105 The study belongs to the Perth Metropolitan area covering four sub-regions (North West,  
106 Middle Central, Inner Central and South West) (Fig 1). Perth is located in a globally recognised  
107 biodiversity hotspot [32] in a region of Mediterranean-type climate and has experienced  
108 extensive urban development at an unsustainable rate [33]. Together with urbanization, the  
109 golf industry has expanded contributing to a growing proportion of Perth's urban green space.  
110 There are 34 golf courses in the study area (Fig 1)

### 111 **Figure 1. Study area**

### 112 **Approaches**

113 We conducted two types of analyses in this study: (1) assessment of vegetation cover  
114 change in golf courses since 1988 relative to surrounding areas to provide a broad  
115 overall context of the urban vegetation changes that have taken place throughout the  
116 region and the role of golf courses; and (2) assessment of MSPA. In these analyses, we  
117 used four data sets (1988, 1998, 2008, 2018) covering thirty years of urban  
118 development. The steps taken in this study are summarized in a flow chart (Fig 2).

### 119 **Landsat data and pre-processing**

120 Three Landsat 5 Thematic Mapper images (WRS path 113 row 82) were acquired from  
121 1988 to 2008 and one Landsat OLI 8 (WRS path 113 row 82) was acquired in 2018 at  
122 four time steps (1988, 1998, 2008, 2018). The Landsat imagery were obtained from the  
123 US Geological Survey (USGS) Earth Resources Observation. Image dates were

124 selected from cloud-free scenes acquired during December (summer, dry season).  
125 Georeferencing was performed at the USGS prior to downloading the data (L1T level  
126 of systematic geometric accuracy) and no further refinement was undertaken.  
127 Atmospheric and topographic corrections were performed on the Landsat data sets. The  
128 atmospheric correction was carried out to adjust the multitemporal dataset to a common  
129 radiometric scale [34].

130 The first process of atmospheric correction was conversion of the digital number (DN)  
131 remote sensing data values to at-sensor radiance based on the image header file. After  
132 that we employed the image-based models - dark object subtraction (DOS) to correct  
133 atmospheric scattering scene-by-scene [35, 36]. Topographic correction was conducted  
134 to remove the topographic effects. We used sun-canopy-sensor (SCS) correction based  
135 on the 30 m digital elevation model (DEM) because topographic shading is not only  
136 due to slope but also to shadowing of one tree crown over another and this is one of the  
137 most widely and effective used methods of topographic correction [37].

138 **Figure 2. Flow chart summarizing the major steps taken during the**  
139 **investigation.**

140 (NDVI: Normalized Difference Vegetation Index; MSPA: Morphological Spatial  
141 Pattern Analysis)

## 142 Classification

143 In a preliminary step, we used a decor relation stretch to enhance the image for more  
144 effective visualization. Prior to image classification, NDVI images were generated. A  
145 classification technique was then applied to the NDVI images of 1988, 1998, 2008 and  
146 2018 using Arc-GIS 10.3 software. NDVI images were obtained by calculating the ratio  
147 between the visible (VIS) and near-infrared (NIR) bands of the satellite image by  
148 equation 1:

$$149 \quad \text{NDVI} = \frac{\text{NIR} - \text{VIS}}{\text{NIR} + \text{VIS}} \quad (1)$$

150 Landsat TM data of different dates were independently classified based on the NDVI  
151 values. The water bodies have negative NDVI values, whereas, bare soil and built-up  
152 areas have an NDVI value of around zero. Green vegetation, on the other hand, has

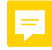

153 stronger near-infrared reflectance thereby providing moderate and high NDVI values  
154 close to +1 [38]. Based on this information, the four NDVI images were classified into  
155 three classes by using the NDVI threshold ranges technique in Arc-GIS 10.3 software.

156 The classification based on NDVI threshold was evaluated using accuracy assessment.  
157 An error matrix compared information from a classified image or land cover map to  
158 known reference (truth) sites for a number of sample points assessed in 2018. We  
159 obtained photographs of representative land use categories with GPS locations to assist  
160 us in our image interpretations. Also, we used Google Earth images, true and false  
161 colour combination images and knowledge-based information including expert  
162 knowledge, land use maps and reports. For historical images, Google Earth was used to  
163 substitute the traditional reference data collection on each of the sites [39]. Based on  
164 data of accuracy assessment, we reclassified the preliminary land use classification  
165 maps to improve the accuracy of classification.

## 166 **Vegetation change detection**

167 In order to detect the vegetation cover change, we created binary maps of vegetation  
168 and non-vegetation from the classified maps in the previous analysis, one for each  
169 adjacent pair of time steps, which depict where degradation occurred within a decade  
170 of urbanization. This post-classification analysis uses two images from different dates  
171 and classifies them independently. We then calculated changes in vegetation cover type  
172 using equation 2:

$$173 \qquad \qquad \qquad \text{Change area} = D_2 - D_1 \qquad \qquad (2)$$

174 where  $D_1$  and  $D_2$  are the area of the target vegetation cover at the beginning and the end  
175 of the study period, respectively. This analysis allows the calculation of vegetation loss  
176 and gain in each period.

## 177 **Golf courses Analysis 1**

178 We compared the vegetation cover, and the change detection (vegetation loss and gain)  
179 taking place within all golf courses in the study area, and in their surrounding regions.  
180 After creating the GIS boundaries of these golf courses, we extracted the vegetation  
181 cover and the vegetation change within these boundaries at four time steps in 1988,

198 1998, 2008 and 2018 to compare vegetation dynamic within the golf courses and the  
 199 whole study area over time.

200 **MSPA analysis for the structural connectivity of habitats**

201 MSPA was employed to describe the structural connectivity of habitats in Perth for four  
 202 time steps in 1988, 1998, 2008 and 2018. This method describes the spatial and temporal  
 203 configuration of the ecosystem at the pixel level [40], which was based on the concept  
 204 of “habitat availability” and “graphic theory” [41, 42] in which the landscape is  
 205 considered as a collection of nodes, and links with a node is a place where connectivity  
 206 exists and will depend on the width of itself. The output of the MSPA analysis includes  
 207 the seven structural categories into which habitats are divided, including core, edge,  
 208 perforation, bridge, loop, branch and islet (Table 1).

209 **Table 1: Definition of MSPA classes (see [43] and [44]).**

| <b>Class</b>       | <b>Description</b>                                                                                          | <b>Ecological Meaning</b>                                                                                                                     |
|--------------------|-------------------------------------------------------------------------------------------------------------|-----------------------------------------------------------------------------------------------------------------------------------------------|
| <b>Core</b>        | Foreground surrounded by foreground and greater than the user-specified edge width from background          | Large-scale natural patches with high connectivity                                                                                            |
| <b>Edge</b>        | Foreground that separates core from background                                                              | The transition zone between green space and non-green space.                                                                                  |
| <b>Perforation</b> | Foreground that separates core from interior areas of background                                            | Unnatural patch inside the core area.                                                                                                         |
| <b>Bridge</b>      | Linearly oriented foreground that connects two disjunct core areas                                          | Striped ecological land between core areas with high connectivity, which is equivalent to the connecting corridor of the green space network. |
| <b>Loop</b>        | Linearly oriented foreground that extends from core and connects back to the same core area (e.g. a handle) | Connecting corridor inside a large natural patch.                                                                                             |
| <b>Branch</b>      | Linearly oriented foreground that extends from core and terminates in background                            | Striped ecological land with low connectivity.                                                                                                |
| <b>Islet</b>       | Area of foreground that is too small to contain core                                                        | Small natural patches that are not connected to each other.                                                                                   |

210

195 In order to undertake the MSPA analysis, we defined the input data (foreground  
196 class). For this study, we used the classified maps for 1988, 1998, 2008, 2018 in  
197 analysis 1 to create the binary maps which contained vegetation and non-  
198 vegetation classes. Hence, the high and full covered vegetation pixels were  
199 defined as the foreground pixels (green landscape) in the MSPA approach. The  
200 results of MSPA analysis for the four time steps allowed us to assess the changes  
201 in habitat connectivity in the major urban area of Perth over 30 years of  
202 urbanization.

### 203 **Golf course analysis 2**

204 To assess the role of golf courses in maintaining biodiversity connectivity over  
205 30 years, we compared the habitat connectivity taking place within all golf  
206 courses in the study area and in their surrounding regions. Using the GIS  
207 boundaries of the golf courses, we extracted the habitat connectivity within the  
208 golf course boundaries for four time steps (1988, 1998, 2008 and 2018).

## 209 **Results**

### 210 **Land use classification in Perth**

211 Data sets representing four time periods (1988, 1998, 2008 and 2018) are shown in  
212 Figure 3 and Table 2, which provides an overview of the land use changes (vegetation,  
213 built up and bare land, water bodies) over recent decades. From the 1988 and 1998 data  
214 sets, it is evident that over half of the region was vegetated. However, the urban  
215 footprint of built up and bare land area had increased 10% by 2018. As a consequence,  
216 there was a significant decrease in vegetation cover, which comprised 56% of the land  
217 surface in 1988 and declined by 10.1% over the next 30 years (Table 2). We obtained  
218 an overall accuracy (OA) of classification of 87% and a kappa coefficient of 91% for  
219 the three classes.

220

221

222

223

224

**Table 2. Land use classification within the Perth Metropolitan Region.**

| Land use category | Whole area     |                        |              | Golf course |                        |              |     |
|-------------------|----------------|------------------------|--------------|-------------|------------------------|--------------|-----|
|                   | Vegetation     | Built up and bare soil | Water bodies | Vegetation  | Built up and bare soil | Water bodies |     |
| <b>1988</b>       | Area (ha)      | 98,446                 | 74,376       | 2,667       | 929                    | 210          | 0.1 |
|                   | Proportion (%) | 56.1                   | 42.4         | 1.5         | 81.5                   | 18.5         | 0.0 |
| <b>1998</b>       | Area (ha)      | 91,754                 | 81,464       | 2,271       | 1,042                  | 97           | 0.7 |
|                   | Proportion (%) | 52.3                   | 46.4         | 1.3         | 91.4                   | 8.5          | 0.1 |
| <b>2008</b>       | Area (ha)      | 88,341                 | 84,971       | 2,176       | 1,084                  | 55           | 0.2 |
|                   | Proportion (%) | 50.3                   | 48.4         | 1.2         | 95.1                   | 4.9          | 0.0 |
| <b>2018</b>       | Area (ha)      | 80,755                 | 92,243       | 2,491       | 1,093                  | 46           | 0.7 |
|                   | Proportion (%) | 46.0                   | 52.6         | 1.4         | 95.9                   | 4            | 0.1 |

225

226

**Figure 3. Map of land use classification in four time steps.**

227

Using the GIS layer of land use categories, we extracted the data for three classes within the golf courses in comparison with the whole area (Table 2). Our analysis shows that while there was a significant decrease in vegetation cover throughout the region, the total area of golf courses remained unchanged at 1140 ha over the last 30 years.

228

229

230

231

### **Spatial patterns of vegetation change**

232

To characterize spatial patterns of vegetation dynamics, we detected the vegetation loss and gain for each of the three decades (Fig 4). In the period 1988 to 1998, vegetation clearing occurred intensively in the central and north regions. From 1998 to 2008, vegetation loss expanded to the north and south of the city. However, in the last decade from 2008 to 2018, vegetation loss accelerated in the distal regions with urbanization. However, there was also some vegetation gain over the three decades (Fig 4, Table 3) predominantly in the north part of the city.

233

234

235

236

237

238

 **Figure 4. Change in vegetation over three decades.**

239

240

241

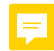

242 **Table 3. Vegetation loss and gain (ha) in three time periods over the period 1988**  
 243 **to 2018.**

| Period              |                 | 1988-1998 | 1998-2008 | 2008-2018 |
|---------------------|-----------------|-----------|-----------|-----------|
| <b>Whole Area</b>   | Vegetation loss | 22,231    | 19,250    | 20,178    |
|                     | Vegetation gain | 15,538    | 15,838    | 12,591    |
|                     | Net loss        | 6,692     | 3,412     | 7,587     |
| <b>Golf courses</b> | Vegetation loss | 68        | 27        | 40        |
|                     | Vegetation gain | 219       | 92        | 43        |
|                     | Net gain        | 152       | 64        | 4         |

244 Calculation of changes within the golf courses and in the whole area (Table 3) showed  
 245 that the major urban area of Perth experienced a net loss in vegetation cover. Though  
 246 vegetation compensation occurred together with vegetation clearing over 30 years of  
 247 urbanization, the vegetation loss was always much larger than vegetation gain with the  
 248 largest net vegetation loss occurring in the last decade. However, the golf courses  
 249 showed a different trend where the net gain of vegetation cover happened over three  
 250 decades and the largest gain was between 1988 and 1998.

251 **Analysis of connectivity components of green space networks**

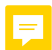

252 Results of the MSPA analysis indicate that the reduction in vegetation cover over the  
 253 last thirty years has led to a decline in connectivity. Among the two types of landscape  
 254 that are important for connectivity (core and bridge), the total area of core class  
 255 decreased by about 10% over three decades while the bridge class was maintained at  
 256 around 37,000 ha, but the proportion of this class per total vegetation cover area (VCA)  
 257 increased due to the reduction of vegetation cover over time (Table 4). This analysis also  
 258 shows the fluctuation in the areas of the rest of the MSPA classes including islets, loops,  
 259 edges, perforations, and branches which do not contribute to connectivity in the  
 260 landscape. The proportion of these classes increased through time from 24% in 1988 to  
 261 30% in 2008 and 2018.

262 Figure 5 shows that the core area was distributed mostly in the north part of the city and  
 263 their areas decreased significantly in later years. In 1988, the bridge class covered a  
 264 large area of the city central region but this decreased over time. In recent years, most



265 of the vegetation cover in the central region of the city belongs to the islet, loop, edge,  
266 perforation and branch classes, illustrating that isolation became more serious in the  
267 central region of the city over the three decades.

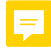

**Figure 5. Results of MSPA analysis.**

268 The vegetation cover within golf courses also contributes to connectivity. The  
269 proportion of core area within golf courses fluctuated between 12% and 27%.  
270 Moreover, the largest proportion of vegetation in golf courses was classified as bridge  
271 but it experienced a downward trend from 52% to 41% in three decades. Of the  
272 remaining classes which do not contribute to connectivity, the edge and loop classes  
273 accounted for a higher proportion with each of them contributing 7% to 16% of total  
274 vegetation cover.

275  
276  
277  
278  
279  
280  
281  
282  
283  
284  
285  
286  
287  
288  
289  
290  
291

292

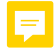

293

**Table 4. Results of MSPA analysis of connectivity of Perth's vegetation from 1988 to 2018.**

294

| Landscape type     | Year | Perth Metropolitan Region |                             | Within golf courses |                             |
|--------------------|------|---------------------------|-----------------------------|---------------------|-----------------------------|
|                    |      | Area (ha)                 | Proportion of total VCA (%) | Area (ha)           | Proportion of total VCA (%) |
| <b>Core</b>        | 1988 | 32,012                    | 32.6                        | 325                 | 23.2                        |
|                    | 1998 | 20,607                    | 22.5                        | 171                 | 12.7                        |
|                    | 2008 | 22,251                    | 25.3                        | 230                 | 16.7                        |
|                    | 2018 | 18,101                    | 22.5                        | 383                 | 27.3                        |
| <b>Bridge</b>      | 1988 | 37,127                    | 37.9                        | 738                 | 52.6                        |
|                    | 1998 | 39,412                    | 43.0                        | 814                 | 60.2                        |
|                    | 2008 | 37,902                    | 43.1                        | 732                 | 53.1                        |
|                    | 2018 | 37,503                    | 46.7                        | 588                 | 42.0                        |
| <b>Islet</b>       | 1988 | 10,396                    | 10.6                        | 31                  | 2.2                         |
|                    | 1998 | 16,436                    | 17.9                        | 78                  | 5.8                         |
|                    | 2008 | 12,922                    | 14.7                        | 15                  | 1.1                         |
|                    | 2018 | 12,349                    | 15.4                        | 37                  | 2.7                         |
| <b>Perforation</b> | 1988 | 1,099                     | 1.1                         | 3                   | 0.2                         |
|                    | 1998 | 486                       | 0.5                         | -                   | -                           |
|                    | 2008 | 834                       | 1.0                         | -                   | -                           |
|                    | 2018 | 406                       | 0.5                         | 6                   | 0.4                         |
| <b>Edge</b>        | 1988 | 7,430                     | 7.6                         | 162                 | 11.5                        |
|                    | 1998 | 4,814                     | 5.3                         | 95                  | 7.0                         |
|                    | 2008 | 4,986                     | 5.7                         | 147                 | 10.7                        |
|                    | 2018 | 5,218                     | 6.5                         | 230                 | 16.4                        |
| <b>Loop</b>        | 1988 | 5,670                     | 5.8                         | 112                 | 8.0                         |
|                    | 1998 | 6,295                     | 6.9                         | 146                 | 10.8                        |
|                    | 2008 | 5,607                     | 6.4                         | 209                 | 15.2                        |
|                    | 2018 | 3,669                     | 4.6                         | 129                 | 9.2                         |
| <b>Branch</b>      | 1988 | 4,361                     | 4.5                         | 32                  | 2.3                         |
|                    | 1998 | 3,619                     | 4.0                         | 47                  | 3.5                         |
|                    | 2008 | 3,491                     | 4.0                         | 43                  | 3.2                         |
|                    | 2018 | 3,117                     | 3.9                         | 29                  | 2.1                         |

295

296

297

## 298 **Discussion**

299 We used Landsat imagery to characterize the patterns of vegetation change, habitat  
300 connectivity and the role of golf courses in maintaining green spaces and connectivity  
301 in an urban landscape. We found that vegetation clearing led to reduction in habitat  
302 connectivity in the Perth Metropolitan Region. However, golf courses can play an  
303 important role in maintaining vegetation and supporting biodiversity connectivity in  
304 urban landscapes. Prior work has documented the increase in the urban footprint of  
305 Perth using multi-temporal urban expansion statistics derived from Satellite imagery  
306 [45]. However, this study did not address the issues of vegetation dynamics, nor the  
307 biodiversity and structure of the vegetation and habitat connectivity.

### 308 **Vegetation clearing and urbanization**

309 The vegetation dynamics in the major urban areas of Perth reflect the pattern of  
310 urbanization over time. The reduction in green space found in this study can be  
311 explained as a close relation to the process of development in this city. Over the last  
312 three decades, urban development in Perth has taken place at an unsustainable rate [33].  
313 In the early 1990s to 2006, Perth's population grew by around 1.8%, but the figure has  
314 nearly doubled since then [46]. Also, this study indicated that, from 1988 to 2018,  
315 Perth's urban footprint increased from 74 to 92 ha (Table 2) and is consistent with  
316 previous research in urban growth in this region [45]. In addition to expansion, the city  
317 has become denser due to the construction of new residential dwellings in urbanised  
318 areas. In the last 20 years, on average, 740 ha/yr of urban and urban deferred zoned land  
319 was consumed by subdivision, and 830 ha/yr was consumed by construction in the Perth  
320 metropolitan area and nearby Peel region [47].

321 The difference in spatial patterns of vegetation loss are also related to the urban plans  
322 of this city. Our results show that between 1988 and 1998, there was significant  
323 vegetation loss in the central region of the city which can be linked to The Corridor Plan  
324 [48]. Historically, Perth's development pattern from 1970s to 1990s was based on linear  
325 corridors stretching out from the city's core, with large non-urban wedges between each  
326 of these corridors [48]. However, from 1998 to 2008 and from 2008 to 2018, vegetation

327 clearing was more significant in outer subregions of the north-west and south-west of  
328 the city due to the adoption of METROPLAN [49]. Perth recently has been divided into  
329 subregional areas, rather than corridors for planning purposes. The two coastal  
330 subregions (the North-West and South-West) included in our study have consistently  
331 achieved higher rates of population growth under Metroplan [50].

332 Originally the region was covered by woodlands dominated by eucalypts and banksias  
333 and coastal heath interspersed with chains of wetlands. Perth is home to a rich  
334 biodiversity, with more than 1,700 species of flowering plants and iconic species of  
335 threatened fauna in the region [51]. Therefore, such vegetation clearing for urbanization  
336 has resulted in the devastating loss of significant natural habitats in this biodiversity  
337 hotspot city, leading to the designation of an endangered ecological community by the  
338 Australian Government [32].

### 339 **Connectivity of green space networks in urban landscapes**

340 The MSPA analysis indicates that the loss of area of vegetation as a consequence of  
341 urban expansion has led to a marked reduction in connectivity of green space networks  
342 in the Perth urban landscape. In the MSPA analysis, only **cores and bridges** can  
343 contribute to the connectivity between the habitat areas in the landscape. The reduction  
344 of these areas in our study indicates the high impact of urbanization on habitat  
345 connectivity through the loss of core areas, which act as stepping stones between forest  
346 habitat patches, and the loss of bridges that act as structural corridors to link two or  
347 more core areas [52]. This analysis also shows the increase in proportion of islets, which  
348 are totally isolated patches, and other classes (perforations, loops, branches, edges) that  
349 cannot reach a new core habitat area for originating the potential movement [52].  
350 Clearly, expansion of Perth city has fragmented the remaining blocks of natural habitat  
351 and increased isolation of natural habitats. This may reduce population and gene flow  
352 among patches and may disrupt the connection between subpopulations and a large  
353 regional population [53].

354 The fragmentation process was obvious in the central region of the city and in recent  
355 decades it has become more serious in the outer parts of the city. This is critical as Perth  
356 is within a globally recognised biodiversity hotspot, which is home to rich biodiversity

357 found nowhere else in the world. The connectivity in the major urban area of Perth is  
358 not only critical for the linkage of habitats within the Swan Coastal Plain but also for  
359 the connection of these coastal habitats to a large regional biosphere in south-western  
360 Australia.

361 The results also illustrated that a ‘Core’ area and a network of ‘Bridge’ types exist in  
362 the central and outer subregions of Perth. This is the consequence of early conservation  
363 efforts of the government which created protected areas such as Kings Park, Bold Park  
364 and other significant areas. Very few cities in the world have such large areas of natural  
365 bushland in the centre of a big city [54]. However, future urban growth will continue to  
366 put pressure on the biodiversity. If current policies (Perth and Peel@3.5million) are  
367 fully implemented, existing stocks of urban and urban deferred land would be consumed  
368 by about 2075 [55]. The challenge for urban planning to preserve urban forests and  
369 biodiversity is thus increasing.

370 Our MSPA output with spatial distribution of seven classes provides fundamental  
371 information for future urban planning. There is a need to maintain important green  
372 spaces which are classified as cores and bridges in the city, especially in the central  
373 region where most of the natural vegetation exists as islands. Also, the MSPA branch  
374 classes can be used to identify candidate ecological restoration areas. The branch class  
375 can be thought of [56] as a foundation of a potential corridor that could, if revegetated,  
376 connect two spatially disjunct core areas to improve connectivity in the larger region.

377 Although other analyses, such as functional connectivity, should be taken into account  
378 in landscape connectivity assessment [40], the structural connectivity analysis in this  
379 study will be useful for determining the priority protection level and critical areas of the  
380 connecting corridor, informing conservation strategies at a variety of scales, especially  
381 when the biodiversity values of this region are suffering from various threats including  
382 land clearing, feral animals, weed incursions, more frequent fires through arson and tree  
383 disease [51].

### 384 **The role of golf courses in maintaining urban forest**

385 Our study indicates that golf courses account for a significant proportion of the urban  
386 area of Perth. This category of land use has been vital in maintaining green space in

387 urban areas over the past thirty years. In contrast to the overall decline in urban green  
388 space, golf courses have preserved green spaces within urban settings and even created  
389 a net gain of vegetation cover over time. The highest net gain was seen in the period  
390 between 1988 to 1998 when some golf courses were established resulting in the planting  
391 of trees.

392 In the green ‘matrix’ of Perth, golf courses with their significant area of vegetation cover  
393 have contributed considerably to the connectivity in the urban landscape. A significant  
394 proportion of their green space was classified as core or bridge categories. The  
395 proportion of vegetation within golf courses classified as bridges was higher than in the  
396 whole study area. Golf courses with large areas of native vegetation provide “links” to  
397 other large natural patches of urban vegetation. 

398 Although there are concerns with the environmentally negative impacts of golf courses  
399 as a source of pollution through pesticide and fertiliser usage [22], habitat modification  
400 [25] and high water usage [57], previous studies provide evidence about the biological  
401 values of golf courses, such as providing refugial habitat for urban-avoiding wildlife  
402 [24, 58-66]. Our study indicates that golf courses in urban settings have been  
403 maintaining large green-area habitats and played an important role in biodiversity  
404 connectivity in the city.

## 405 **Monitoring urban forest dynamics**

406 In this study, we utilized medium-resolution satellite remote sensing data to identify  
407 land use classes, characterise vegetation dynamics and connectivity. The data maps the  
408 spatial and temporal patterns of land use types characterizing a consistent, detailed  
409 vegetation dynamic of the city [45, 67]. Clearly, the biophysical elements of urban  
410 landscapes are well-reflected through physical features (NDVI) derived from remote  
411 sensing data with an accuracy of up to 89%.

412 Despite these kinds of data, it is hard to describe the detailed information of ecosystem  
413 such as species composition and forest structure. However, they show their advantage  
414 in mapping land cover dynamics across large areas of big cities over time when high  
415 resolution imagery is not available. For monitoring urban forests in big cities, the large  
416 scale and long temporal datasets are more advantageous compared with datasets that

417 focus only on discerning a specific land use type in a relatively small area [27, 68, 69].  
418 This is because it allows spatially detailed identification of changes associated with  
419 development over time. Therefore, this method provides baseline information for  
420 sustainable urban planning and development. In addition, the MSPA analysis can  
421 further evaluate the dynamic of vegetation cover by the describing the spatial  
422 configuration of ecosystems at the pixel level, detecting changes of habitat connectivity  
423 over time [40].

## 424 **Conclusions**

425 With rapid urban expansion, the most meaningful question to address is how to balance  
426 urban development and urban forest preservation. Urbanization requiring vegetation  
427 clearing is inevitable in many cities worldwide. Our study found a significant loss of  
428 vegetation cover in a biodiversity hotspot over three decades of urbanization, which led  
429 to a reduction in **habitat connectivity** in the urban landscape. A lesson learned from the  
430 experience of urbanization in Perth is that any future urban growth following the  
431 patterns observed over the past three decades will continue to put pressure on  
432 maintaining urban forest ecosystem and biodiversity conservation. As cities continue to  
433 grow in response to socio-economic development, considering all opportunities for  
434 urban biodiversity conservation is important. Urban conservation strategies must  
435 therefore consider not only the protected areas, but also the off-reserve sites.

436 Our study indicates that golf courses in urban settings have been **maintaining green-area**  
437 **habitats and have played an important role in biodiversity connectivity in the city.**

438 Potentially, urban golf courses could become more purposefully managed for  
439 biodiversity conservation and the improvement of critical ecosystem services in urban  
440 areas. In the rapidly urbanizing biodiversity hotspots like Perth, where fragmentation is  
441 one the biggest threats to biodiversity, the way that golf courses contribute to increase  
442 the connectivity in the intervening urban matrix should not be underestimated.  
443 Therefore, it is important for government authorities and golf courses owners to pay  
444 more attention in maintaining ecosystem health in urban golf courses.

445

## 446 **Acknowledgments**

447 The authors thank Dr. Harry Eslick for his valuable advice in helping to design the  
448 research and Mr. Pham Dang Manh Hong Luan for his advice in data analysis. The  
449 research was supported by the Vietnamese Ministry of Education and Training and  
450 Murdoch University through a VIED-MU joint PhD scholarship to the first author.

## 451 **References**

- 452 1. Tabea TaE, Knop. A landscape ecology approach identifies important drivers of urban  
453 biodiversity. *Global Change Biol.* 2015;21 (4):1652-67.
- 454 2. Bagan H, Yamagata Y. Land-cover change analysis in 50 global cities by using a combination  
455 of Landsat data and analysis of grid cells. *Environmental Research Letters.* 2014;9(6):064015. doi:  
456 10.1088/1748-9326/9/6/064015.
- 457 3. UNDESA UNDoEaSA. World urbanization prospects: The 2011 revision. United Nations  
458 Department of Economic and Social Affairs/Population Division, New York: 2012.
- 459 4. McGrane SJ. Impacts of urbanisation on hydrological and water quality dynamics, and urban  
460 water management: a review. *Hydrological Sciences Journal.* 2016;61(13):2295-311. doi:  
461 10.1080/02626667.2015.1128084.
- 462 5. Gaston KJ, Ávila-Jiménez ML, Edmondson JL. REVIEW: Managing urban ecosystems for goods  
463 and services. *Journal of Applied Ecology.* 2013;50(4):830-40. doi: 10.1111/1365-2664.12087.
- 464 6. Deplet-Barreto J, Brazel AJ, Martin CA, Chow WTL, Harlan SL. Creating the park cool island in  
465 an inner-city neighborhood: heat mitigation strategy for Phoenix, AZ. *Urban Ecosystems.*  
466 2013;16(3):617-35. doi: 10.1007/s11252-012-0278-8.
- 467 7. Scott AA, Misiani H, Okoth J, Jordan A, Gohlke J, Ouma G, et al. Temperature and heat in  
468 informal settlements in Nairobi. *PLOS ONE.* 2017;12(11):e0187300. doi:  
469 10.1371/journal.pone.0187300.
- 470 8. Van Den Berg AE, Custers MHG. Gardening promotes neuroendocrine and affective  
471 restoration from stress. *Journal of Health Psychology.* 2010;16(1):1359-053.
- 472 9. Mitchell R. Is physical activity in natural environments better for mental health than physical  
473 activity in other environments? *Social Science & Medicine.* 2013;91(Supplement C):130-4. doi:  
474 <https://doi.org/10.1016/j.socscimed.2012.04.012>.
- 475 10. Donovan GH, Butry DT, Michael YL, Prestemon JP, Liebhold AM, Gatzliolis D, et al. The  
476 relationship between trees and human health: Evidence from the spread of the emerald ash borer.  
477 *American Journal of Preventive Medicine.* 2013;44(2):139-45. doi:  
478 <https://doi.org/10.1016/j.amepre.2012.09.066>.
- 479 11. Ulrich RS. View through a window may influence recovery from surgery. *Science.*  
480 1984;224(4647):420.
- 481 12. Cecily Jane M. Promoting children's mental, emotional and social health through contact  
482 with nature: a model. *Health Education.* 2009;109(6):522-43. doi: 10.1108/09654280911001185.
- 483 13. Lee KE, Williams KJH, Sargent LD, Williams NSG, Johnson KA. 40-second green roof views  
484 sustain attention: The role of micro-breaks in attention restoration. *Journal of Environmental*  
485 *Psychology.* 2015;42(Supplement C):182-9. doi: <https://doi.org/10.1016/j.jenvp.2015.04.003>.
- 486 14. Kim G. Assessing urban forest structure, ecosystem services, and economic benefits on  
487 vacant land. *Sustainability.* 2016;8(7):679. doi: doi:10.3390/su8070679.
- 488 15. Zitkovic M. Managing green spaces for urban biodiversity. Boulevard Louis Schmidt 64 1040  
489 Brussels, Belgium: Countdown 2010 Secretariat, IUCN Regional Office for Europe, 2008.



- 490 16. Seitz J, Escobedo F. Urban forests in Florida: Trees control stormwater runoff and improve  
491 water quality. University of Florida, Institute of Food and Agricultural Sciences. IFAS Extension  
492 Publication FOR184.2014.
- 493 17. Bailey D, Schmidt-Entling MH, Eberhart P, Herrmann JD, Hofer G, Kormann U, et al. Effects of  
494 habitat amount and isolation on biodiversity in fragmented traditional orchards. *Journal of Applied  
495 Ecology*. 2010;47(5):1003-13. doi: 10.1111/j.1365-2664.2010.01858.x.
- 496 18. Yu D, Liu Y, Xun B, Shao H. Measuring landscape connectivity in a urban area for biological  
497 conservation. *CLEAN – Soil, Air, Water*. 2015;43(4):605-13. doi: 10.1002/clen.201200448.
- 498 19. Bierwagen B. Connectivity in urbanizing landscapes: The importance of habitat  
499 configuration, urban area size, and dispersal. 2007;10:29-42. doi: 10.1007/s11252-006-0011-6.
- 500 20. Lindenmayer D, Franklin J. *Conserving forest biodiversity: a comprehensive multiscaled  
501 approach*2002.
- 502 21. Napton DE, Laingen CR. Expansion of Golf Courses in the United States. *Geographical  
503 Review*. 2008;98(1):24-41.
- 504 22. Guzmán C, & Fernández, D., Javier Mesa. Environmental impacts by golf courses and  
505 strategies to minimize them: state of the art. *International Journal of Arts & Sciences*. 2014;7(3):403-  
506 17.
- 507 23. Colding J, Folke C. The role of golf courses in biodiversity conservation and ecosystem  
508 management. *Ecosystems*. 2009;12(2):191-206. doi: 10.1007/s10021-008-9217-1.
- 509 24. Hodgkison SC, Hero JM, Warnken J. The conservation value of suburban golf courses in a  
510 rapidly urbanising region of Australia. *Landscape and Urban Planning*. 2007;79(3):323-37. doi:  
511 <https://doi.org/10.1016/j.landurbplan.2006.03.009>.
- 512 25. Terman MR. Natural links: naturalistic golf courses as wildlife habitat. *Landscape and Urban  
513 Planning*. 1997;38(3):183-97. doi: [https://doi.org/10.1016/S0169-2046\(97\)00033-9](https://doi.org/10.1016/S0169-2046(97)00033-9).
- 514 26. Puglis HJ, Boone MD. Effects of Terrestrial Buffer Zones on Amphibians on Golf Courses.  
515 *PLOS ONE*. 2012;7(6):e39590. doi: 10.1371/journal.pone.0039590.
- 516 27. Theobald DM. Development and Applications of a Comprehensive Land Use Classification  
517 and Map for the US. *PLOS ONE*. 2014;9(4):e94628. doi: 10.1371/journal.pone.0094628.
- 518 28. Hu T, Yang J, Li X, Gong P. Mapping urban land use by using landsat images and open social  
519 data. *Remote Sensing*. 2016;8(2):151. PubMed PMID: doi:10.3390/rs8020151.
- 520 29. Li X, Liu X, Gong P. Integrating ensemble-urban cellular automata model with an uncertainty  
521 map to improve the performance of a single model. *International Journal of Geographical  
522 Information Science*. 2015;29(5):762-85. doi: 10.1080/13658816.2014.997237.
- 523 30. Vogt P, Riitters K, Estreguil C, Kozak J, G. Wade T, Wickham J. Mapping spatial patterns with  
524 morphological image processing.2007. 171-7 p.
- 525 31. Myers N, Mittermeier RA, Mittermeier CG, da Fonseca GAB, Kent J. Biodiversity hotspots for  
526 conservation priorities. *Nature*. 2000;403(6772):853-8. doi: 10.1038/35002501.
- 527 32. Environment Dot. Shrublands and Woodlands of the eastern Swan Coastal Plain in  
528 Community and Species Profile and Threats Database. In: Environment Dot, editor. Canberra.2016.
- 529 33. Dhakal SP. Glimpses of sustainability in Perth, Western Australia: Capturing and  
530 communicating the adaptive capacity of an activist group. *Consilience: The Journal of Sustainable  
531 Development*. 2014;11(1):167–82.
- 532 34. Song C, Woodcock CE, Seto KC, Lenney MP, Macomber SA. Classification and Change  
533 Detection Using Landsat TM Data: When and How to Correct Atmospheric Effects? *Remote Sensing  
534 of Environment*. 2001;75(2):230-44. doi: [https://doi.org/10.1016/S0034-4257\(00\)00169-3](https://doi.org/10.1016/S0034-4257(00)00169-3).
- 535 35. Cui L, Li G, Ren H, He L, Liao H, Ouyang N, et al. Assessment of atmospheric correction  
536 methods for historical Landsat TM images in the coastal zone: A case study in Jiangsu, China.  
537 *European Journal of Remote Sensing*. 2014;47(1):701-16. doi: 10.5721/EuJRS20144740.
- 538 36. Lu D, Mausel P, Brondizio E, Moran E. Assessment of atmospheric correction methods for  
539 Landsat TM data applicable to Amazon basin LBA research. *International Journal of Remote Sensing*.  
540 2002;23(13):2651-71. doi: 10.1080/01431160110109642.

- 541 37. Gu D, Gillespie A. Topographic normalization of landsat TM images of forest based on  
542 subpixel sun–canopy–sensor geometry. *Remote Sensing of Environment*. 1998;64(2):166-75. doi:  
543 [https://doi.org/10.1016/S0034-4257\(97\)00177-6](https://doi.org/10.1016/S0034-4257(97)00177-6).
- 544 38. Herring JWaD. Measuring Vegetation (NDVI & EVI) 2000. Available from:  
545 <https://earthobservatory.nasa.gov/features/MeasuringVegetation>.
- 546 39. Cha S-Y, Park C-H. The utilization of google earth images as reference data for the  
547 multitemporal land cover classification with MODIS data of North Korea.2007.
- 548 40. Vogt P, Riitters K, Estreguil C, Kozak J, G. Wade T, Wickham J. Mapping Spatial Patterns with  
549 Morphological Image Processing2007. 171-7 p.
- 550 41. Pascual-Hortal L, Saura S. Comparison and development of new graph-based landscape  
551 connectivity indices: towards the prioritization of habitat patches and corridors for conservation.  
552 *Landscape Ecology*. 2006;21(7):959-67. doi: 10.1007/s10980-006-0013-z.
- 553 42. Saornil J, Gutiérrez J, Hernando A, Abril A, Sánchez B, Aparicio M. Structural connectivity as  
554 an indicator of species richness and landscape diversity in Castilla y León (Spain)2019. 286-97 p.
- 555 43. Wickham JD, Riitters KH, Wade TG, Vogt P. A national assessment of green infrastructure  
556 and change for the conterminous United States using morphological image processing. 2010.
- 557 44. Shi X, Qin M. Research on the Optimization of Regional Green Infrastructure Network.  
558 *Sustainability*. 2018;10(12):4649. PubMed PMID: doi:10.3390/su10124649.
- 559 45. MacLachlan A, Biggs E, Roberts G, Boruff B. Urban growth dynamics in Perth, Western  
560 Australia: Using applied remote sensing for sustainable future planning. *Land*. 2017;6(1):9. PubMed  
561 PMID: doi:10.3390/land6010009.
- 562 46. WorldPopulationReview. Perth Population 2019 2019 [21 February 2019]. Available from:  
563 <http://worldpopulationreview.com/world-cities/perth-population/>.
- 564 47. Commission WAP. Urban Growth Monitor Perth Metropolitan, Peel and Greater Bunbury  
565 Regions. In: WAPC WAPC, editor. Gordon Stephenson House 140 William Street Perth WA 6000: the  
566 Western Australian Planning Commission; 2019.
- 567 48. Authority MRP. The Corridor Plan for Perth. In: Authority MRP, editor. Perth, WA1970.
- 568 49. Development DoPaU. Metroplan: A planning strategy for the Perth Metropolitan Region. In:  
569 Development DoPaU, editor. Perth, WA.1990.
- 570 50. Bureau of Infrastructure TaREB. Population growth, jobs growth and commuting flows in  
571 Perth, . In: Transport Dola, editor. Canberra ACT 2010.
- 572 51. Department of Biodiversity CaA. A methodology for the evaluation of wetlands on the Swan  
573 Coastal Plain, draft prepared by the Wetlands Section of the Department of Biodiversity. Perth,  
574 WA2017.
- 575 52. Saura S, Vogt P, Velázquez J, Hernando A, Tejera R. Key structural forest connectors can be  
576 identified by combining landscape spatial pattern and network analyses. *Forest Ecology and*  
577 *Management*. 2011;262(2):150-60. doi: <https://doi.org/10.1016/j.foreco.2011.03.017>.
- 578 53. Morjan CL, Rieseberg LH. How species evolve collectively: implications of gene flow and  
579 selection for the spread of advantageous alleles. *Mol Ecol*. 2004;13(6):1341-56. doi: 10.1111/j.1365-  
580 294X.2004.02164.x. PubMed PMID: 15140081.
- 581 54. Green T. Perth's Urban Forest: A WA 2.0 Project. 2018.
- 582 55. Commission WAP. Perth and Peel @ 3.5 Million. In: Department of Planning GoWA, editor.  
583 Perth,WA, Australia2015.
- 584 56. Wickham J, Riitters K, Vogt P, Costanza J, Neale A. An inventory of continental U.S. terrestrial  
585 candidate ecological restoration areas based on landscape context2017.
- 586 57. Neylan J. Improving The Environmental Management of New South Wales Golf courses. In:  
587 NSW DoEaCC, editor. 59–61 Goulburn Street, Sydney, PO Box A290.
- 588 58. Deslauriers MR, Asgary A, Nazarnia N, Jaeger JAG. Implementing the connectivity of natural  
589 areas in cities as an indicator in the City Biodiversity Index (CBI). *Ecological Indicators*. 2017. doi:  
590 <https://doi.org/10.1016/j.ecolind.2017.02.028>.

- 591 59. Dobbs EK, Potter DA. Naturalized habitat on golf courses: source or sink for natural enemies  
592 and conservation biological control? *Urban Ecosystems*. 2016;19(2):899-914. doi: 10.1007/s11252-  
593 015-0521-1.
- 594 60. Saarikivi J, Tähtinen S, Malmberg S, Kotze DJ. Converting land into golf courses – effects on  
595 ground beetles (Coleoptera, Carabidae). *Insect Conservation and Diversity*. 2015;8(3):247-51. doi:  
596 10.1111/icad.12103.
- 597 61. Chester ET, Robson BJ. Anthropogenic refuges for freshwater biodiversity: Their ecological  
598 characteristics and management. *Biological Conservation*. 2013;166(Supplement C):64-75. doi:  
599 <https://doi.org/10.1016/j.biocon.2013.06.016>.
- 600 62. Saarikivi J, Idström L, Venn S, Niemelä J, Kotze DJ. Carabid beetle assemblages associated  
601 with urban golf courses in the greater Helsinki area. *European Journal of Entomology*.  
602 2010;107(4):553-61. PubMed PMID: 814377100.
- 603 63. Hudson M-AR, Bird DM. Recommendations for design and management of golf courses and  
604 green spaces based on surveys of breeding bird communities in Montreal. *Landscape and Urban*  
605 *Planning*. 2009;92(3):335-46. doi: <https://doi.org/10.1016/j.landurbplan.2009.05.017>.
- 606 64. Colding J, Lundberg J, Lundberg S, Andersson E. Golf courses and wetland fauna. *Ecological*  
607 *Applications*. 2009;19(6):1481-91. doi: 10.1890/07-2092.1.
- 608 65. Burgin S, Wotherspoon D. The potential for golf courses to support restoration of  
609 biodiversity for BioBanking offsets. *Urban Ecosystems*. 2009;12(2):145-55. doi: 10.1007/s11252-008-  
610 0076-5.
- 611 66. Tanner RA, Gange AC. Effects of golf courses on local biodiversity. *Landscape and Urban*  
612 *Planning*. 2005;71(2):137-46. doi: <https://doi.org/10.1016/j.landurbplan.2004.02.004>.
- 613 67. Angiuli E, Trianni G. Urban Mapping in Landsat Images Based on Normalized Difference  
614 Spectral Vector. *IEEE Geoscience and Remote Sensing Letters*. 2014;11(3):661-5. doi:  
615 10.1109/LGRS.2013.2274327.
- 616 68. Wu S-S, Qiu X, Usery EL, Wang L. Using Geometrical, Textural, and Contextual Information of  
617 Land Parcels for Classification of Detailed Urban Land Use. *Annals of the Association of American*  
618 *Geographers*. 2009;99(1):76-98. doi: 10.1080/00045600802459028.
- 619 69. Toole JL, Ulm M, González MC, Bauer D, editors. Inferring land use from mobile phone  
620 activity. *Proceedings of the ACM SIGKDD international workshop on urban computing*; 2012: ACM.

621

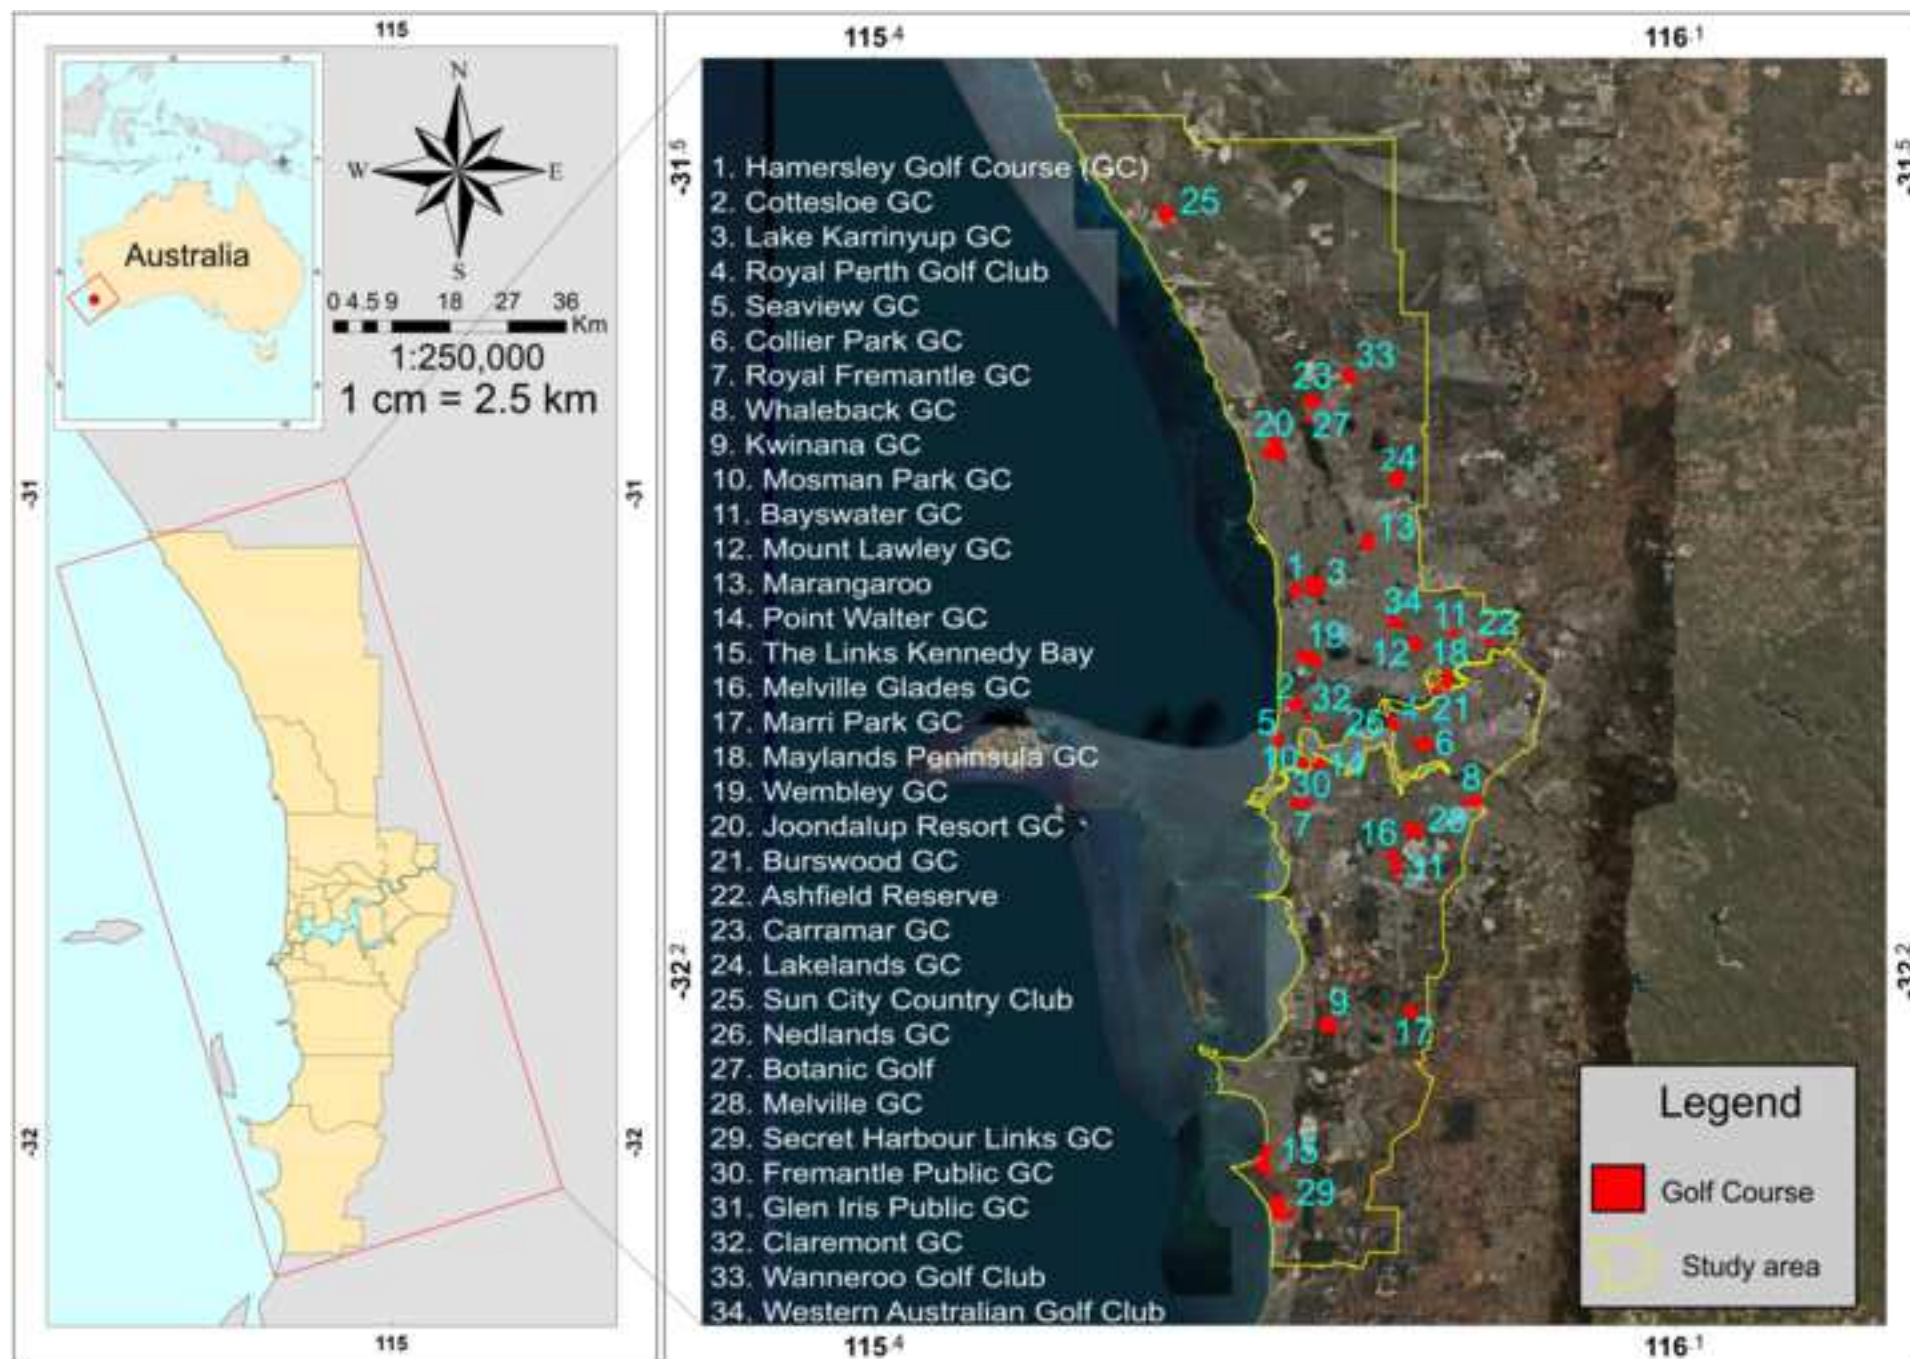

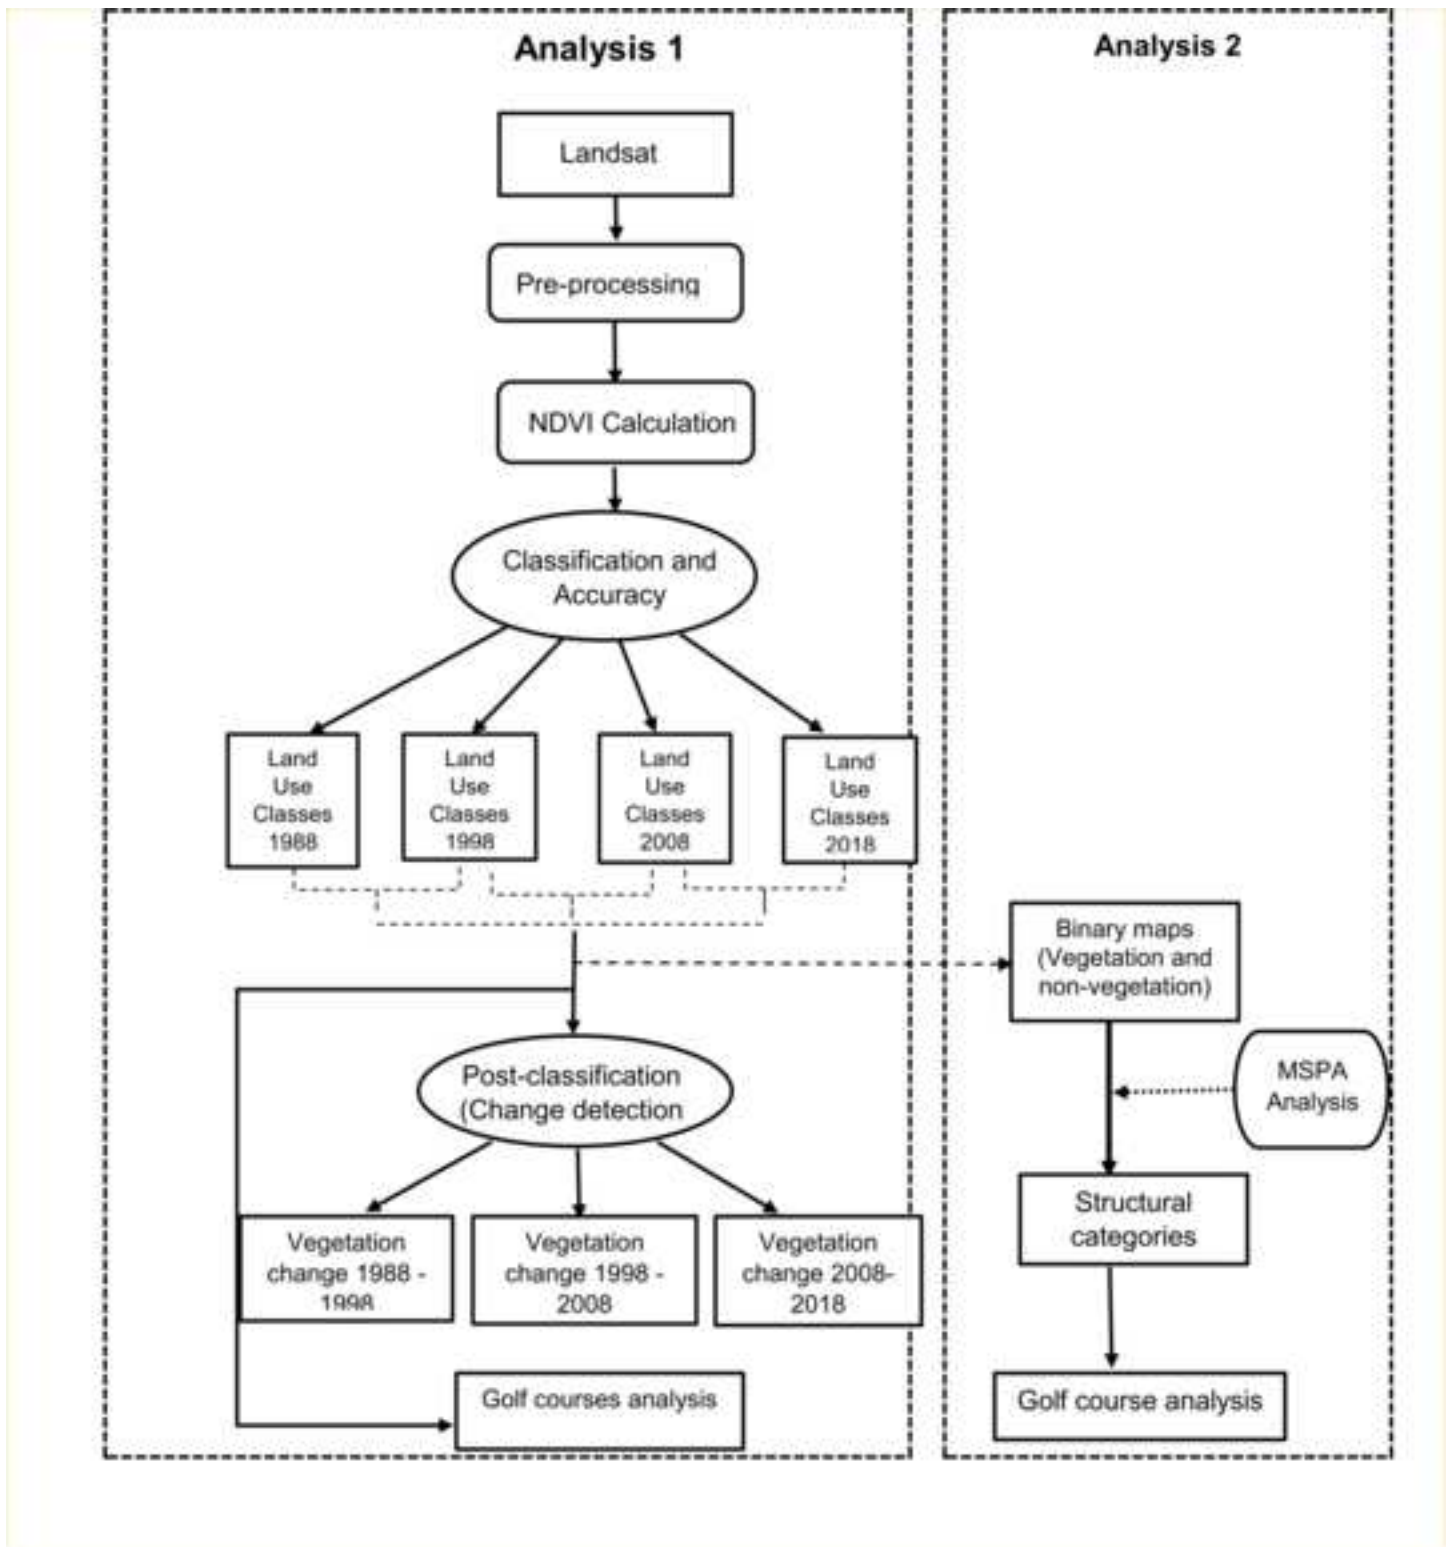

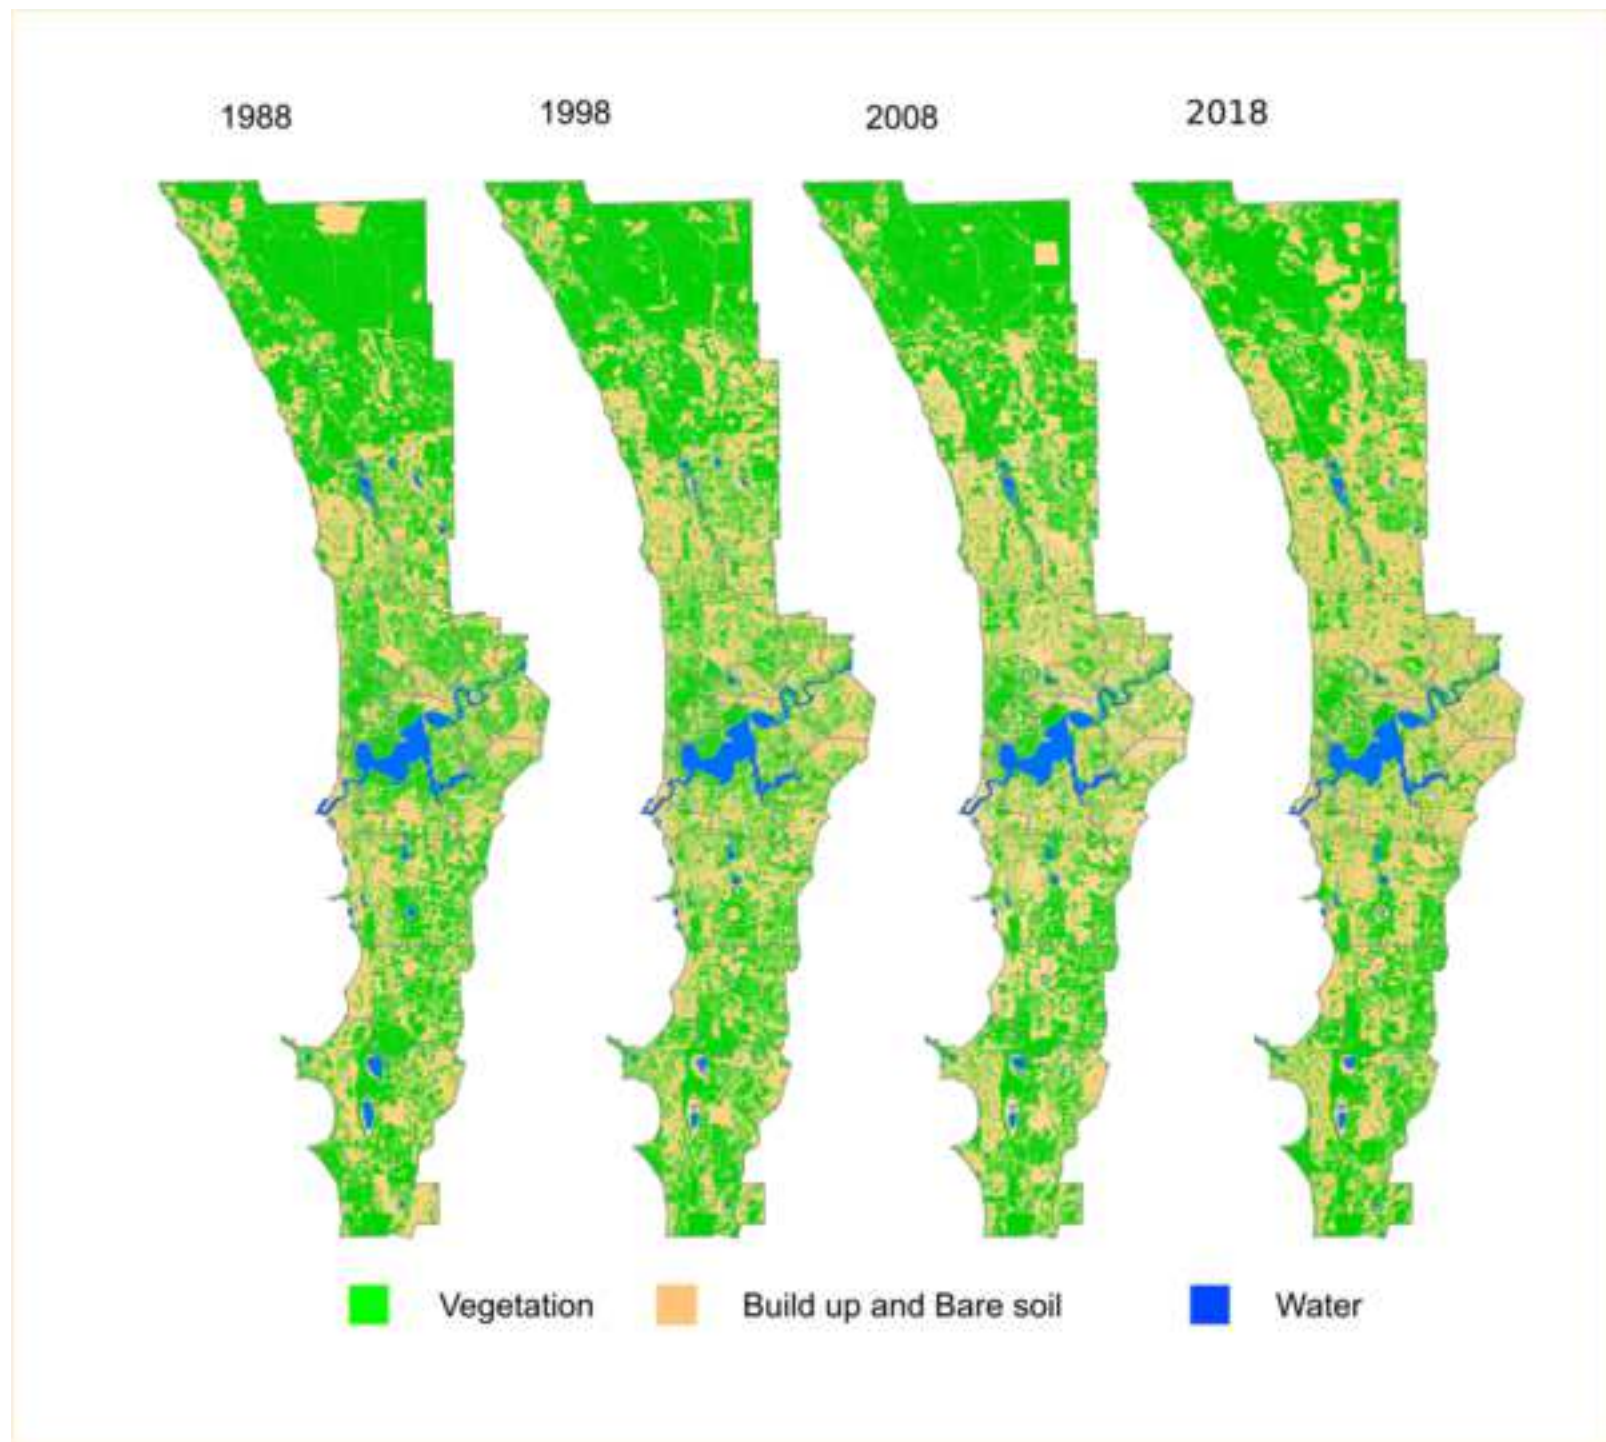

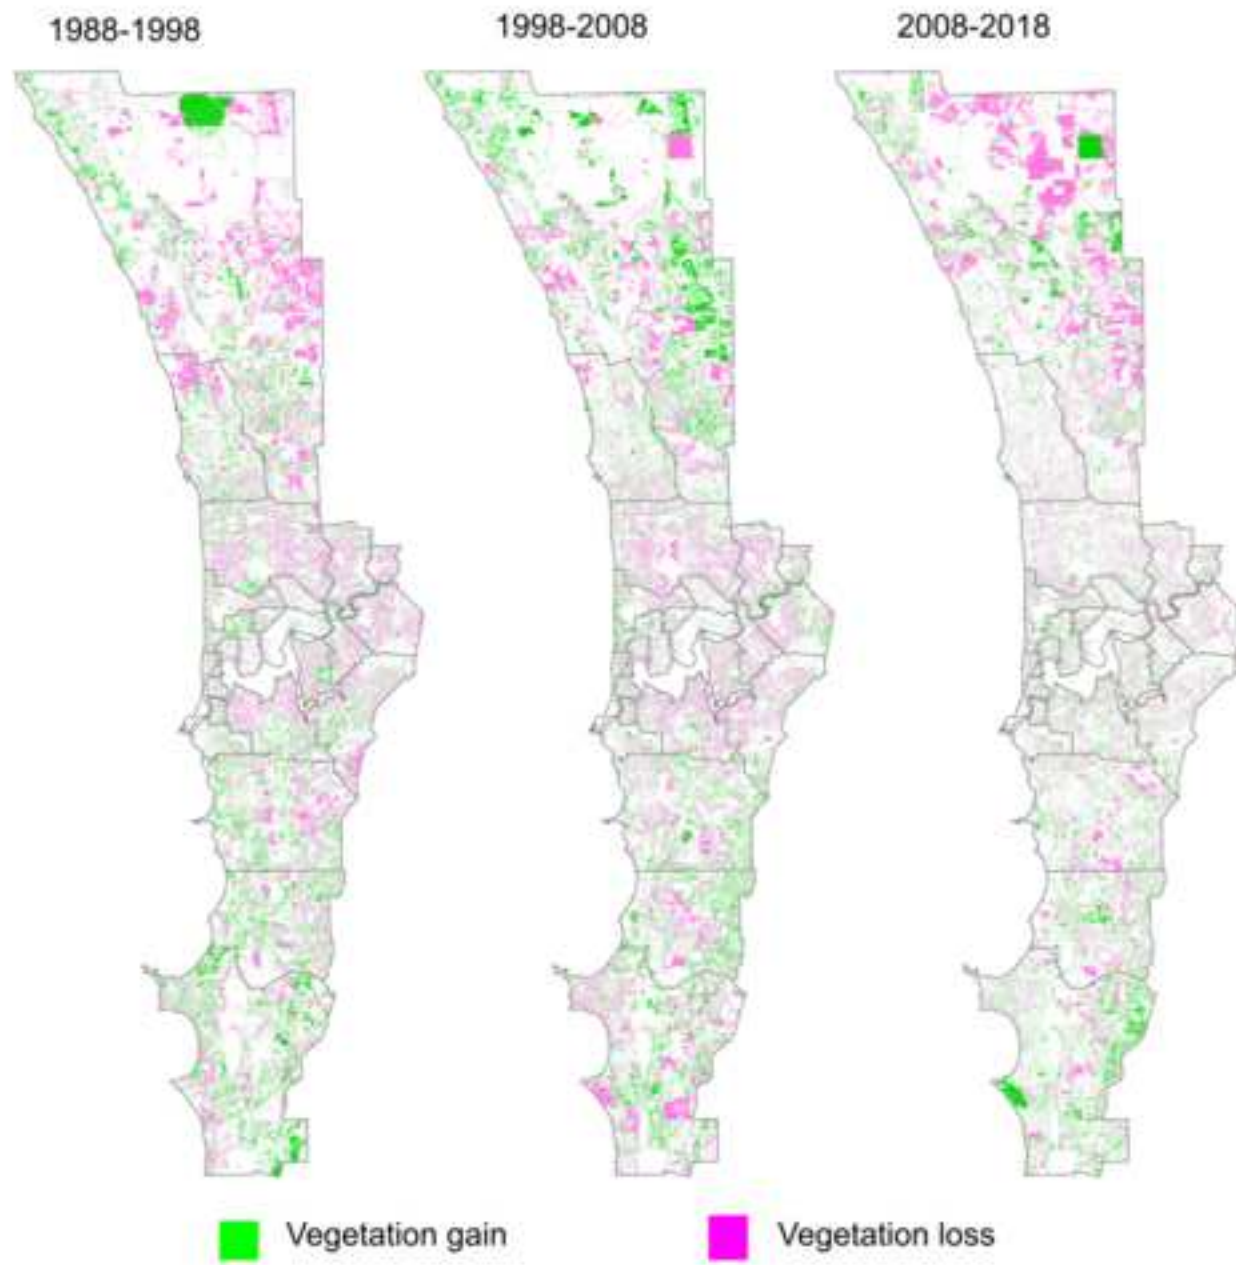

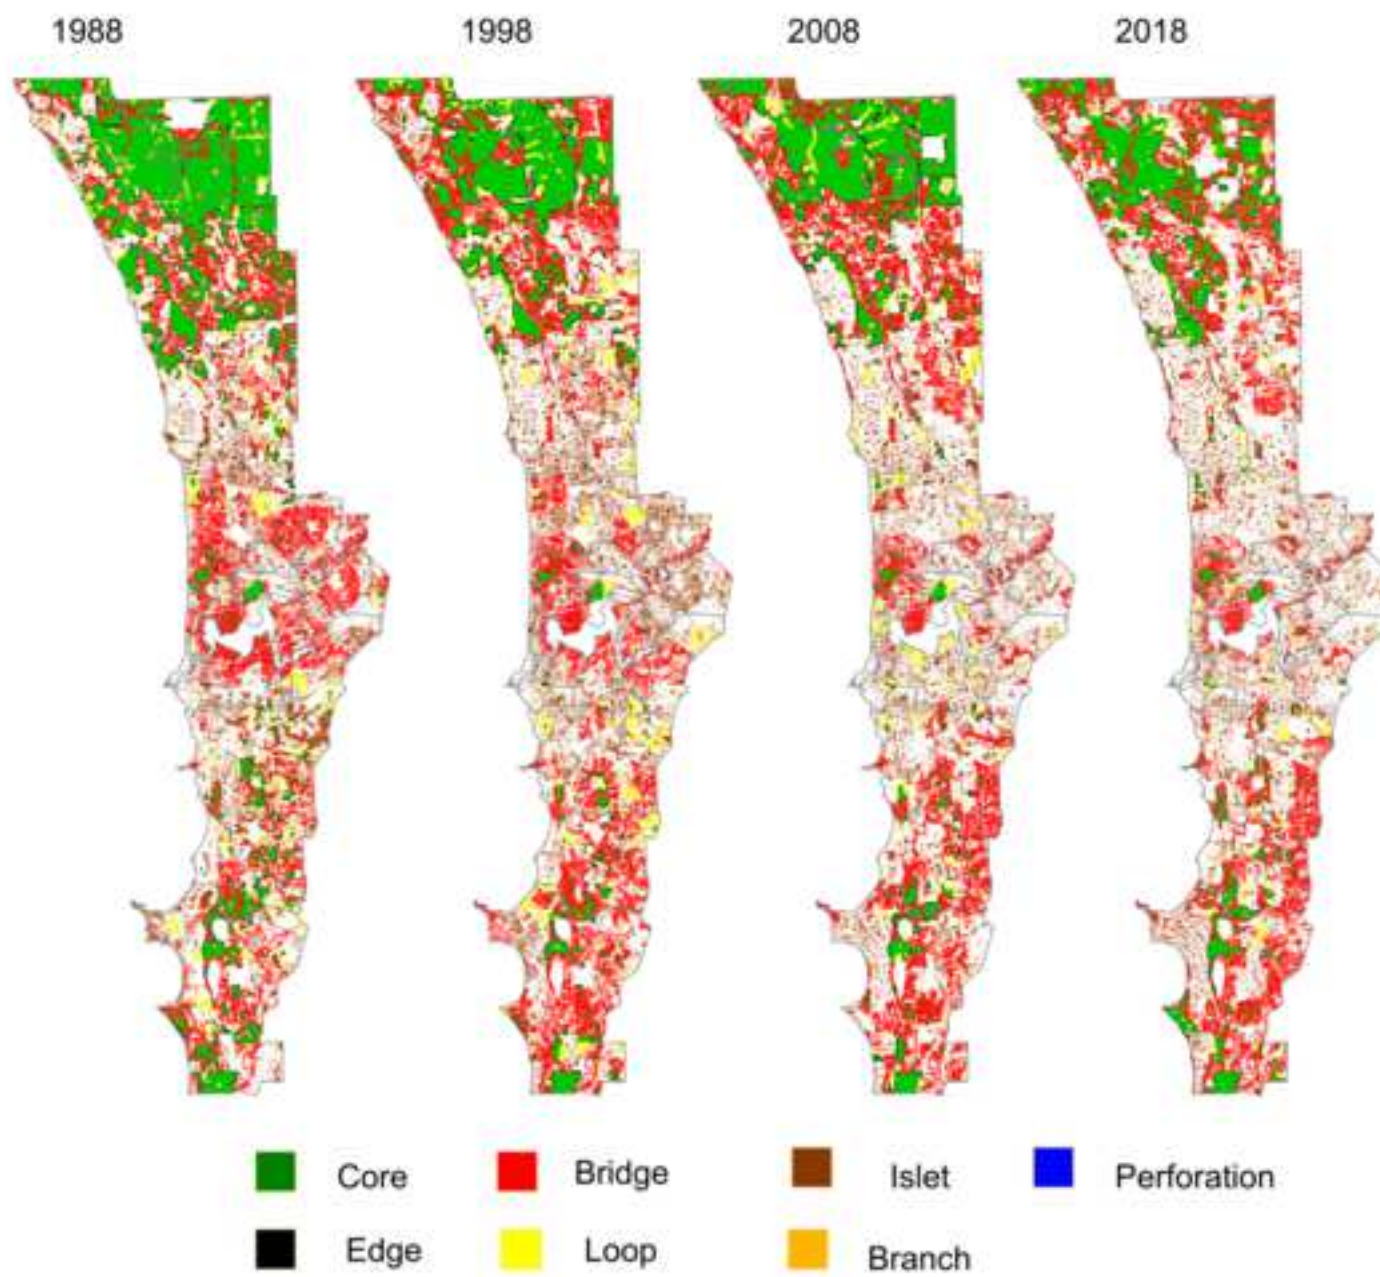

Supplement: pone.0228090.s001.pdf [file pone.0228090.s001.pdf]
