# Supplementary material for: Vegetation trends associated with urban development: The role of golf courses
Source: PubMed Central journal article supplement (PMC7001943; doi:10.1371/journal.pone.0228090), 2020-02-05
Supplement: pone.0228090.s004.pdf [file pone.0228090.s004.pdf]

# PLOS ONE

## Vegetation trends associated with urban development: the role of golf courses

--Manuscript Draft--

|                                |                                                                                                                                                                                                                                                                                                                                                                                                                                                                                                                                                                                                                                                                                                                                                                                                                                                                                                                                                                                                                                                                                                                                                                                                                                                                                                                                                                                                                                                                                                                                                                                                                                                                                                                                                                                                                                                                                                                                                                                                                                                                                                                            |
|--------------------------------|----------------------------------------------------------------------------------------------------------------------------------------------------------------------------------------------------------------------------------------------------------------------------------------------------------------------------------------------------------------------------------------------------------------------------------------------------------------------------------------------------------------------------------------------------------------------------------------------------------------------------------------------------------------------------------------------------------------------------------------------------------------------------------------------------------------------------------------------------------------------------------------------------------------------------------------------------------------------------------------------------------------------------------------------------------------------------------------------------------------------------------------------------------------------------------------------------------------------------------------------------------------------------------------------------------------------------------------------------------------------------------------------------------------------------------------------------------------------------------------------------------------------------------------------------------------------------------------------------------------------------------------------------------------------------------------------------------------------------------------------------------------------------------------------------------------------------------------------------------------------------------------------------------------------------------------------------------------------------------------------------------------------------------------------------------------------------------------------------------------------------|
| <b>Manuscript Number:</b>      | PONE-D-19-19510R1                                                                                                                                                                                                                                                                                                                                                                                                                                                                                                                                                                                                                                                                                                                                                                                                                                                                                                                                                                                                                                                                                                                                                                                                                                                                                                                                                                                                                                                                                                                                                                                                                                                                                                                                                                                                                                                                                                                                                                                                                                                                                                          |
| <b>Article Type:</b>           | Research Article                                                                                                                                                                                                                                                                                                                                                                                                                                                                                                                                                                                                                                                                                                                                                                                                                                                                                                                                                                                                                                                                                                                                                                                                                                                                                                                                                                                                                                                                                                                                                                                                                                                                                                                                                                                                                                                                                                                                                                                                                                                                                                           |
| <b>Full Title:</b>             | Vegetation trends associated with urban development: the role of golf courses                                                                                                                                                                                                                                                                                                                                                                                                                                                                                                                                                                                                                                                                                                                                                                                                                                                                                                                                                                                                                                                                                                                                                                                                                                                                                                                                                                                                                                                                                                                                                                                                                                                                                                                                                                                                                                                                                                                                                                                                                                              |
| <b>Short Title:</b>            | Urban development and the role of golf courses                                                                                                                                                                                                                                                                                                                                                                                                                                                                                                                                                                                                                                                                                                                                                                                                                                                                                                                                                                                                                                                                                                                                                                                                                                                                                                                                                                                                                                                                                                                                                                                                                                                                                                                                                                                                                                                                                                                                                                                                                                                                             |
| <b>Corresponding Author:</b>   | Thu T Nguyen<br>Vietnam National University of Forestry<br>Ha Noi, VIET NAM                                                                                                                                                                                                                                                                                                                                                                                                                                                                                                                                                                                                                                                                                                                                                                                                                                                                                                                                                                                                                                                                                                                                                                                                                                                                                                                                                                                                                                                                                                                                                                                                                                                                                                                                                                                                                                                                                                                                                                                                                                                |
| <b>Keywords:</b>               | Urban ecosystems, vegetation change, biodiversity connectivity, biodiversity hotspot, golf courses, remote sensing                                                                                                                                                                                                                                                                                                                                                                                                                                                                                                                                                                                                                                                                                                                                                                                                                                                                                                                                                                                                                                                                                                                                                                                                                                                                                                                                                                                                                                                                                                                                                                                                                                                                                                                                                                                                                                                                                                                                                                                                         |
| <b>Abstract:</b>               | <p>Globally, cities are growing rapidly in size and density and this has caused profound impacts on urban forest ecosystems. Urbanization requiring deforestation reduces ecosystem services that benefit both city dwellers and biodiversity. Understanding spatial and temporal patterns of vegetation changes associated with urbanization is thus a vital component of future sustainable urban development. We used Landsat time series data for three decades from 1988 to 2018 to characterize changes in vegetation cover and habitat connectivity in the Perth Metropolitan Area, in a rapidly urbanising Australian biodiversity hotspot, as a case study to understand the impacts of urbanization on urban forests. Moreover, as golf courses are a major component in urban areas, we assessed the role of golf courses in maintaining vegetation cover and creating habitat connectivity. To do this we employed (1) land use classification with post-classification change detection, and (2) Morphological Spatial Pattern Analysis (MSPA). Over 17,000 ha of vegetation were cleared and the area of vegetation contributing to biodiversity connectivity was reduced significantly over the three decades. The spatial patterns of vegetation loss and gain were different in each of the three decades (1988-2018) reflecting the implementation of urban planning. Furthermore, MSPA analysis showed that the reduction in vegetation cover led to habitat fragmentation with a significant decrease in the core and bridge classes and an increase in isolated patches in the urban landscape. Golf courses played a useful role in maintaining vegetation cover and contributing to connectivity in a regional biodiversity hotspot. Our findings suggest that for future urban expansion, urban planning needs to more carefully consider the impacts of deforestation on connectivity in the landscape. Moreover, there is a need to take into consideration opportunities for off-reserve conservation in smaller habitat fragments such as in golf courses in sustainable urban management.</p> |
| <b>Order of Authors:</b>       | <p>Thu Thi Nguyen</p> <p>Paul Barber</p> <p>Richard Harper</p> <p>Tran Vu Khanh Linh</p> <p>Bernard Dell</p>                                                                                                                                                                                                                                                                                                                                                                                                                                                                                                                                                                                                                                                                                                                                                                                                                                                                                                                                                                                                                                                                                                                                                                                                                                                                                                                                                                                                                                                                                                                                                                                                                                                                                                                                                                                                                                                                                                                                                                                                               |
| <b>Response to Reviewers:</b>  | <p>Reviewer 1: We have incorporated all of your comments into to our revision. They were very useful.</p> <p>Reviewer 2: We have incorporated all of your comments into to our revision. Thank you for your helpful suggestions.</p> <p>Reviewer 3: We have incorporated all of your comments into to our revision. Thank you for your help.</p> <p>Reviewer 4: We have incorporated all of your comments into to our revision. They were very helpful.</p>                                                                                                                                                                                                                                                                                                                                                                                                                                                                                                                                                                                                                                                                                                                                                                                                                                                                                                                                                                                                                                                                                                                                                                                                                                                                                                                                                                                                                                                                                                                                                                                                                                                                |
| <b>Additional Information:</b> |                                                                                                                                                                                                                                                                                                                                                                                                                                                                                                                                                                                                                                                                                                                                                                                                                                                                                                                                                                                                                                                                                                                                                                                                                                                                                                                                                                                                                                                                                                                                                                                                                                                                                                                                                                                                                                                                                                                                                                                                                                                                                                                            |
| <b>Question</b>                | <b>Response</b>                                                                                                                                                                                                                                                                                                                                                                                                                                                                                                                                                                                                                                                                                                                                                                                                                                                                                                                                                                                                                                                                                                                                                                                                                                                                                                                                                                                                                                                                                                                                                                                                                                                                                                                                                                                                                                                                                                                                                                                                                                                                                                            |

## Financial Disclosure

Enter a financial disclosure statement that describes the sources of funding for the work included in this submission. Review the [submission guidelines](#) for detailed requirements. View published research articles from [PLOS ONE](#) for specific examples.

This statement is required for submission and **will appear in the published article** if the submission is accepted. Please make sure it is accurate.

### Unfunded studies

Enter: *The author(s) received no specific funding for this work.*

### Funded studies

Enter a statement with the following details:

- Initials of the authors who received each award
- Grant numbers awarded to each author
- The full name of each funder
- URL of each funder website
- Did the sponsors or funders play any role in the study design, data collection and analysis, decision to publish, or preparation of the manuscript?
- **NO** - Include this sentence at the end of your statement: *The funders had no role in study design, data collection and analysis, decision to publish, or preparation of the manuscript.*
- **YES** - Specify the role(s) played.

\* typeset

TTN received PhD scholarship co-funded by Vietnam and Murdoch University.

## Competing Interests

Use the instructions below to enter a competing interest statement for this submission. On behalf of all authors, disclose any [competing interests](#) that could be perceived to bias this work—acknowledging all financial support and any other relevant financial or non-financial competing interests.

This statement **will appear in the published article** if the submission is accepted. Please make sure it is

A/Prof. Paul Barber is employed by the commercial entity ArborCarbon who provides in-kind support only through the employment of the co-author A/Prof. Paul Barber and access to facilities, equipment and software. This commercial affiliation does not alter our adherence to all PLOS ONE policies in sharing data and materials. Prof. Dell, Prof. Harper and other authors have no competing interests.

accurate. View published research articles from [PLOS ONE](#) for specific examples.

**NO authors have competing interests**

Enter: *The authors have declared that no competing interests exist.*

**Authors with competing interests**

Enter competing interest details beginning with this statement:

*I have read the journal's policy and the authors of this manuscript have the following competing interests: [insert competing interests here]*

\* typeset

**Ethics Statement**

Enter an ethics statement for this submission. This statement is required if the study involved:

- Human participants
- Human specimens or tissue
- Vertebrate animals or cephalopods
- Vertebrate embryos or tissues
- Field research

Write "N/A" if the submission does not require an ethics statement.

General guidance is provided below. Consult the [submission guidelines](#) for detailed instructions. **Make sure that all information entered here is included in the Methods section of the manuscript.**

No ethics approval required for the project.

**Format for specific study types**

**Human Subject Research (involving human participants and/or tissue)**

- Give the name of the institutional review board or ethics committee that approved the study
- Include the approval number and/or a statement indicating approval of this research
- Indicate the form of consent obtained (written/oral) or the reason that consent was not obtained (e.g. the data were analyzed anonymously)

**Animal Research (involving vertebrate animals, embryos or tissues)**

- Provide the name of the Institutional Animal Care and Use Committee (IACUC) or other relevant ethics board that reviewed the study protocol, and indicate whether they approved this research or granted a formal waiver of ethical approval
- Include an approval number if one was obtained
- If the study involved *non-human primates*, add *additional details* about animal welfare and steps taken to ameliorate suffering
- If anesthesia, euthanasia, or any kind of animal sacrifice is part of the study, include briefly which substances and/or methods were applied

**Field Research**

Include the following details if this study involves the collection of plant, animal, or other materials from a natural setting:

- Field permit number
- Name of the institution or relevant body that granted permission

**Data Availability**

Authors are required to make all data underlying the findings described fully available, without restriction, and from the time of publication. PLOS allows rare exceptions to address legal and ethical concerns. See the [PLOS Data Policy](#) and [FAQ](#) for detailed information.

Yes - all data are fully available without restriction

A Data Availability Statement describing where the data can be found is required at submission. Your answers to this question constitute the Data Availability Statement and **will be published in the article**, if accepted.

**Important:** Stating 'data available on request from the author' is not sufficient. If your data are only available upon request, select 'No' for the first question and explain your exceptional situation in the text box.

Do the authors confirm that all data underlying the findings described in their manuscript are fully available without restriction?

**Describe where the data may be found in full sentences. If you are copying our sample text, replace any instances of XXX with the appropriate details.**

- If the data are **held or will be held in a public repository**, include URLs, accession numbers or DOIs. If this information will only be available after acceptance, indicate this by ticking the box below. For example: *All XXX files are available from the XXX database (accession number(s) XXX, XXX).*
- If the data are all contained **within the manuscript and/or Supporting Information files**, enter the following: *All relevant data are within the manuscript and its Supporting Information files.*
- If neither of these applies but you are able to provide **details of access elsewhere**, with or without limitations, please do so. For example:

*Data cannot be shared publicly because of [XXX]. Data are available from the XXX Institutional Data Access / Ethics Committee (contact via XXX) for researchers who meet the criteria for access to confidential data.*

*The data underlying the results presented in the study are available from (include the name of the third party*

All relevant data are within the manuscript

|                                                                                                                                                                                                                                         |  |
|-----------------------------------------------------------------------------------------------------------------------------------------------------------------------------------------------------------------------------------------|--|
| <p><i>and contact information or URL).</i></p> <ul style="list-style-type: none"><li>• This text is appropriate if the data are owned by a third party and authors do not have permission to share the data.</li></ul> <p>* typeset</p> |  |
| Additional data availability information:                                                                                                                                                                                               |  |



34 deforestation on connectivity in the landscape. Moreover, there is a need to take into consideration  
35 opportunities for off-reserve conservation in smaller habitat fragments such as in golf courses in  
36 sustainable urban management.

## 37 **1 Introduction**

38 Globally, cities have grown rapidly in number and size over recent decades [1, 2]. This trend is predicted  
39 to continue as urban areas are expected to absorb most global population growth [3]. While the process  
40 of urbanization presents key implications for changes in physical landscapes and demographic  
41 characteristics, it can cause profound impacts on environmental components, especially on urban forest  
42 ecosystems [4, 5].

43 Vegetation in urban landscapes is critically important because provides goods and services, and full  
44 ecosystem functions that benefit city dwellers and the environment. On the one hand, a remarkable range  
45 of human well-being benefits are derived from urban green spaces including mitigating the urban heat  
46 island (UHI) effect which is a threat to human health [6, 7]; reducing stress [8], improving healing times  
47 [11], increasing self-esteem and empowerment [12], and improving cognitive ability [13]. On the other  
48 hand, urban green spaces provide various ecosystem services such as strengthening resistance to some  
49 kinds of natural disasters for example, floods [14], promoting biological processes such as pollination  
50 [15], and reducing surface erosion from stormwater runoff [16]. The amount of vegetation in cities  
51 strongly influences biodiversity, especially where vegetation is set aside during the process of  
52 urbanization [17]. However, if species dispersal and exchange among these patches is insufficient to  
53 allow gene flow and diversity, loss of regional biodiversity is inevitable [18]. Therefore, urban  
54 development that requires deforestation, with habitat loss and fragmentation is a threat to biodiversity  
55 [17, 19].

56 Urban conservation strategies must therefore consider not only the size and quality of habitat reserves,  
57 but the connectivity in the intervening urban vegetation matrix [19]. While the need to protect large  
58 habitat reserves is obvious, opportunities for off-reserve conservation of smaller habitat fragments  
59 should not be overlooked [20]. Understanding spatial and temporal patterns of vegetation change



60 associated with urbanization, as well as opportunities for the preservation of green spaces outside natural  
61 reserves, is vital for future sustainable urban development especially in areas of global ecological  
62 importance.

63 As the number of golf courses is rapidly increasing in many urban areas worldwide [21], there have  
64 been many environmental arguments about this green space category in urban landscapes. Golf courses  
65 are sometime considered to be major polluters of the environment through pesticide and fertilizer use  
66 [22]. In fact, golf courses have been established for recreational purposes, which are a mix of bushland,  
67 fairways and infrastructure. Though they are not fully ecologically functional as with a natural parks,  
68 previous studies investigated the condition of vegetation inside the golf courses and indicated that the  
69 bushland in non-playing areas of golf courses are significantly important to biodiversity conservation  
70 and the provision of ecosystem services in cities [24], such as providing refuge habitats for urban-  
71 avoiding wildlife [23, 25, 26]. Therefore, potentially, together with the natural reserves, golf courses  
72 can play some roles as off-reserve sites for purposeful biodiversity conservation in urban landscapes.  
73 Nevertheless, little research has been undertaken to comprehensively assess the role of golf courses in  
74 maintaining vegetation patches as interconnected nodes in urban landscapes during a long period of  
75 urban development where deforestation was significant.

76 Deforestation for urban expansion can occur gradually over multiple years. Satellite-based remote  
77 sensing holds certain advantages in the characterization of these changes in urban landscapes because  
78 of the large spatial coverage, high time resolution, and wide availability of data [27]. For example,  
79 medium resolution Landsat images allow mapping of large urban areas [28]. Many methods have been  
80 used to detect, monitor and quantify vegetation changes, but differences in vegetation index and land  
81 use classification are the most widely used methods for vegetation change over a long period of time  
82 [28].

83 A great number of vegetation indices have been proposed, ranging from very simple to very complex  
84 band combinations [29]. The most widely-used vegetation index is the Normalized Difference  
85 Vegetation Index (NDVI), which is the most efficient and simple metric to identify vegetated areas and  
86 their condition [30]. This separates green vegetation from other surfaces based on the ability of

the differential absorption of red by chlorophyll and reflection of NIR by green vegetation.

87 chlorophyll to absorb red light for photosynthesis and reflect the near-infrared (NIR) wavelengths [31].

88 Furthermore, information on vegetation cover dynamics can be combined with Morphological Spatial  
89 Pattern Analysis (MSPA) to describe the spatial configuration of the ecosystem at the pixel level, making  
90 it possible to detect temporal changes in the structural connectivity of habitats in urban settings [32].

91 Therefore, to enhance the understanding of vegetation dynamics associated with urbanization and the  
92 role of golf courses in maintaining urban forests, we used Landsat imagery to map vegetation cover and  
93 to assess its spatial and temporal distribution over three decades from 1988 to 2018. Maps of vegetation  
94 cover were used for MSPA analysis to detect changes in habitat connectivity. We chose the Perth  
95 Metropolitan area for the study as it lies within a rapidly urbanizing biodiversity hotspot in Australia.  
96 The three primary research objectives were to: (1) determine the spatial and temporal patterns of  
97 deforestation in urbanization; (2) evaluate the spatial and temporal patterns of green landscape  
98 connectivity; and (3) assess the role of golf courses in preserving green spaces and biodiversity in an  
99 urban landscape. This analysis will provide a useful perspective on the land-use pressure facing  
100 vegetation remnants in this region which is recognised as one of 35 international biodiversity hotspots  
101 with over 1500 plant species with a high degree of endemism [33], and provide a framework for planning  
102 urban expansions both in this region and globally.

## 103 **2 Methods**

### 104 **2.1 Study area**

105 The study area belongs to the Perth Metropolitan region covering four sub-regions (North West, Middle  
106 Central, Inner Central and South West). Perth has a Mediterranean-type temperate climate with a hot  
107 and dry summer, and a cold and rainy season occurring between May and October [34]. Under future  
108 climate-change scenarios, this area is projected to experience a lower annual rainfall [35].

109 Perth belongs to the Australia's southwest corner, which is recognized as a global biodiversity "hotspot"  
110 with outstanding natural environments. Our study area occurs on the Swan Coastal Plain which is part  
111 of the southwest of Australia which in turn has the highest concentration of rare and endangered species  
112 on the entire continent (at least 1,500 endemic species). More than 6,000 species of native plants and

113 100 native mammals, birds, frogs and reptiles occur in this region, making it a [biodiversity "hotspot"](#)  
114 [33, 36].

115 Perth has retained a significant area of natural vegetation which has conservation significance thanks to  
116 the introduction of legislation and policies aimed primarily at protecting biophysical environmental  
117 values. This includes the Western Australian *Environmental Protection Act* 1986 [37]; the Federal  
118 Government's *Environment Protection and Biodiversity Conservation Act* 1999 [38]; and more recently,  
119 Bush Forever [39, 40], a policy which took a whole-of-government approach to identify and protect  
120 biologically significant bushland and wetlands within the Perth metropolitan area. However, Perth has  
121 experienced extensive urban development since the 1980s [42]. The expansive growth of the Perth  
122 metropolitan footprint has contributed to the loss of biodiversity, together with the ecosystem services  
123 provided by natural areas. Together with urbanization, the golf industry has expanded contributing to a  
124 growing proportion of Perth's urban green space with 34 golf courses in the study area (Figure 1).

Excellent additions

125 **Figure 1. Location of the study area**

126 (The Landsat 8 on 30 September 2018 from USGS EROS (Earth Resources Observatory and Science  
127 (EROS) Center) in the public domain: <http://eros.usgs.gov>) 

## 128 2.2 *Approaches*

129 We conducted two types of analyses in this study: (1) assessment of vegetation cover change in golf  
130 courses since 1988 relative to surrounding areas to provide a broad overall context of the urban  
131 vegetation changes that have taken place throughout the region and the role of golf courses; and (2)  
132 assessment of MSPA. In these analyses, we used four data sets (1988, 1998, 2008, 2018) covering thirty  
133 years of urban development. The steps taken in this study are summarized in a flow chart (Figure 2).

### 134 2.2.1 *Landsat data and pre-processing*

135 Three Landsat 5 Thematic Mapper images (WRS path 113 row 82) were acquired from 1988 to 2008  
136 and one Landsat OLI 8 (WRS path 113 row 82) was acquired in 2018 at four time steps, including year  
137 1988 (11<sup>th</sup> December), year 1998 (7<sup>th</sup> December), year 2008 (18<sup>th</sup> December), year 2018 (14<sup>th</sup>  
138 December). The Landsat imagery were obtained from the US Geological Survey (USGS) of the Earth

139 Resources Observation and Science Center (EROS). Image dates were selected acquired during  
140 December (summer, dry season) to reduce the seasonal difference effects. All images selected are cloud-  
141 free scenes or little cloud cover (0.05% and 0.4%) scenes with the whole study area is cloud-free;  
142 Therefore, is no requirement for removing cloud. Georeferencing was performed at the USGS prior to  
143 downloading the data (L1T level of systematic geometric accuracy) and no further refinement was  
144 undertaken. Atmospheric and topographic corrections were performed on the Landsat data sets. The  
145 atmospheric correction was carried out to adjust the multitemporal dataset to a common radiometric  
146 scale [43].

147 The first process of atmospheric correction was conversion of the digital number (DN) remote sensing  
148 data values to at-sensor radiance based on the image header file. After that we employed the image-  
149 based models - dark object subtraction (DOS) to correct atmospheric scattering scene-by-scene. This  
150 method is a widely used and effective method in atmospheric correction [44-50]. Topographic correction  
151 was conducted to remove topographic effects. We used a sun-canopy-sensor (SCS) correction based on  
152 the 30 m digital elevation model (DEM) because topographic shading is not only due to slope but also  
153 to shadowing of one tree crown over another and this is one of the most widely and effective used  
154 methods of topographic correction [51]. 

155 **Figure 2. Flow chart summarizing the major steps taken during the investigation.**

### 156 2.2.2 Classification

157 In a preliminary step, we used a decor relation stretch to enhance the image for more effective  
158 visualization. Prior to image classification, NDVI images were generated. A classification technique  
159 was then applied to the NDVI images of 1988, 1998, 2008 and 2018 using Arc-GIS 10.3 software. NDVI  
160 images were obtained by calculating the ratio between the red (R) and near infrared (NIR) values of the  
161 satellite image using Equation 1:

$$162 \quad \text{NDVI} = \frac{(\text{NIR}-\text{R})}{(\text{NIR}+\text{R})} \quad (1)$$

163 In Landsat 4-7, NDVI = (Band 4 – Band 3) / (Band 4 + Band 3).

164 In Landsat 8,  $NDVI = (Band\ 5 - Band\ 4) / (Band\ 5 + Band\ 4)$ .

165 Landsat TM data from different dates were independently classified based on the NDVI values. Water  
166 bodies have negative NDVI values, whereas, bare soil and built-up areas have an NDVI value of around  
167 zero. Chlorophyll in green vegetation, on the other hand,  has consumed RED to drive photosynthesis  
168 thereby providing moderate and high NDVI values close to +1 [52]. Based on this understanding, the  
169 four NDVI images were classified into three classes (Vegetation, Built up + bare soil, Water bodies)  
170 using the NDVI threshold ranges technique in Arc-GIS 10.3 software.

171 The classification based on NDVI threshold was evaluated using accuracy assessment. An error matrix  
172 compared information from a classified image or land cover map to known reference (truth) sites for a  
173 number of sample points assessed in 2018. We obtained photographs of representative land use  
174 categories with GPS locations to assist in our image interpretations. Also, we used Google Earth images,  
175 true and false colour combination images and knowledge-based information including expert  
176 knowledge, land use maps and reports. For historical images, Google Earth was used to substitute the  
177 traditional reference data collection on each of the sites [53]. Based on data of accuracy assessment, we  
178 reclassified the preliminary land use classification maps to improve the accuracy of classification.

### 179 2.2.3 *Vegetation change detection*

180 In order to detect the vegetation cover change, we created binary maps of vegetation and non-vegetation  
181 from the classified maps in the previous analysis, one for each adjacent pair of time steps, which depict  
182 where degradation occurred within a decade of urbanization. This post-classification analysis uses two  
183 images from different dates and classifies them independently. We then calculated changes in vegetation  
184 cover type using Equation 2:

$$185 \quad \text{Change area} = D_2 - D_1 \quad (2)$$

186 where  $D_1$  and  $D_2$  are the area of the target vegetation cover at the beginning and the end of the study  
187 period, respectively. This analysis allows the calculation of vegetation loss and gain in each period.

### 188 2.2.4 *Golf courses Analysis I*

189 We compared the vegetation cover, and the change (vegetation loss and gain) taking place within all  
190 golf courses in the study area, and in their surrounding regions. After creating the GIS boundaries of the  
191 golf courses, we extracted the vegetation cover and the vegetation change within these boundaries at  
192 four time steps in 1988, 1998, 2008 and 2018 to compare vegetation dynamics within the golf courses  
193 and the whole study area over time.

194 *2.2.5 Morphological Spatial Pattern Analysis (MSPA) for the structural connectivity of*  
195 *habitats*

196 MSPA was employed to describe the structural connectivity of habitats in Perth for four time steps in  
197 1988, 1998, 2008 and 2018. This method describes the spatial and temporal configuration of the  
198 ecosystem at the pixel level [32], which was based on the concept of “habitat availability” and “graphic  
199 theory” [54, 55] in which the landscape is considered as a collection of nodes, and links with a node is  
200 a place where connectivity exists and will depend on the width of itself. The output of the MSPA analysis  
201 includes the seven structural categories into which habitats are divided, including core, edge,  
202 perforation, bridge, loop, branch and islet [56] and [57] and is summarized in Table 1.

203

204

205

206

207

208

209

210

211

212

213 **Table 1. Definition of Morphological Spatial Pattern Analysis (MSPA) classes**

| Class       | Description                                                                                                               | Ecological Meaning                                                                                                              |
|-------------|---------------------------------------------------------------------------------------------------------------------------|---------------------------------------------------------------------------------------------------------------------------------|
| Core        | A collection of foreground pixels which are interconnected and greater than the user-specified edge width from background | Large-scale natural patches with high connectivity                                                                              |
| Edge        | Transition pixels between the foreground and background that form the outer edge                                          | The transition zone between vegetation and non-vegetation areas.                                                                |
| Perforation | The transition pixels between foreground and background inside core areas that form the inner edge                        | Unnatural patch inside the core area.                                                                                           |
| Bridge      | A set of linear foreground pixels between two cores that connect two or more core areas.                                  | The striped ecological land that connects two cores, which is equivalent to the connecting corridor of the green space network. |
| Loop        | Linearly oriented foreground pixels extended from core that connects core area to itself.                                 | Connecting corridor inside a large natural patch.                                                                               |
| Branch      | Linearly oriented foreground pixels extended from core that do not connect to any other core area                         | Striped ecological land with low connectivity.                                                                                  |
| Islet       | A collection of foreground pixels which is smaller than the core zone and do not connect to any other foreground cells.   | Small natural patches that are isolated and do not connect to each other.                                                       |

214

215 In order to undertake the MSPA analysis, we defined the input data (foreground class). For this study,  
 216 we used the classified maps for 1988, 1998, 2008, 2018 in Analysis 1 to create the binary maps which  
 217 contained vegetation and non-vegetation classes. Hence, the high and full covered vegetation pixels  
 218 were defined as the foreground pixels (green landscape) in the MSPA approach. The results of MSPA

219 analysis for the four time steps allowed us to assess the changes in habitat connectivity over 30 years of  
220 urbanization. 

#### 221 2.2.6 *Golf course analysis 2*

222 To assess the role of golf courses in maintaining biodiversity connectivity over 30 years, we compared  
223 the habitat connectivity within all golf courses in the study area and in their surrounding green spaces.  
224 Using the GIS boundaries of the golf courses, we extracted the habitat connectivity within the golf  
225 course boundaries for four time steps (1988, 1998, 2008 and 2018).

### 226 3 Results

#### 227 3.1 *Land use classification in Perth*

228 Data sets representing four time periods (1988, 1998, 2008 and 2018) are shown in Figure 3 and Table  
229 3, which provide an overview of the land cover changes (vegetation, built up and bare land, water bodies)  
230 over recent decades. From the 1988 and 1998 data sets, it is evident that over half of the region was  
231 vegetated. However, the urban footprint of built up and bare land area had increased 10% from 1998 to  
232 2018. As a consequence, there was a significant decrease in vegetation cover, which comprised 56% of  
233 the land surface in 1988 and declined by 10.1% over the next 30 years (Table 2).

234

235

236

237

238

239

240

241



242 **Table 2. Land cover classification within the Perth Metropolitan Region.**

|      |                | Land cover category |                        |              |             |                        |              |
|------|----------------|---------------------|------------------------|--------------|-------------|------------------------|--------------|
|      |                | Whole area          |                        |              | Golf course |                        |              |
|      |                | Vegetation          | Built up and bare soil | Water bodies | Vegetation  | Built up and bare soil | Water bodies |
| 1988 | Area (ha)      | 98,446              | 74,376                 | 2,667        | 929         | 210                    | 0.1          |
|      | Proportion (%) | 56.1                | 42.4                   | 1.5          | 81.5        | 18.5                   | 0.0          |
| 1998 | Area (ha)      | 91,754              | 81,464                 | 2,271        | 1,042       | 97                     | 0.7          |
|      | Proportion (%) | 52.3                | 46.4                   | 1.3          | 91.4        | 8.5                    | 0.1          |
| 2008 | Area (ha)      | 88,341              | 84,971                 | 2,176        | 1,084       | 55                     | 0.2          |
|      | Proportion (%) | 50.3                | 48.4                   | 1.2          | 95.1        | 4.9                    | 0.0          |
| 2018 | Area (ha)      | 80,755              | 92,243                 | 2,491        | 1,093       | 46                     | 0.7          |
|      | Proportion (%) | 46.0                | 52.6                   | 1.4          | 95.9        | 4                      | 0.1          |

243

244 **Figure 3. Map of land cover classification for Perth in four time steps between 1988 and**  
 245 **2018** 

246 The analysis had the overall accuracy (OA) of classification from 87% and the kappa coefficient from  
 247 91% for the three classes (Table 3).

248

249

250

251

252

253

254

255

256 **Table 3. Accuracy assessment of land cover maps generated**

| <b>Year 1988</b>       |            |                        |              |       |
|------------------------|------------|------------------------|--------------|-------|
| LULC Class             | Vegetation | Build Up and Bare Soil | Water Bodies | Total |
| Vegetation             | 14         | 1                      | 0            | 15    |
| Build Up and Bare Soil | 1          | 12                     | 2            | 15    |
| Water Bodies           | 0          | 0                      | 15           | 15    |
| Total                  | 15         | 13                     | 17           | 45    |
| Overall Accuracy       |            |                        | 87%          |       |
| Overall Kappa          |            |                        | 0.91         |       |
| <b>Year 1998</b>       |            |                        |              |       |
| LULC Class             | Vegetation | Build Up and Bare Soil | Water Bodies | Total |
| Vegetation             | 15         | 0                      | 0            | 15    |
| Build Up and Bare Soil | 0          | 13                     | 2            | 15    |
| Water Bodies           | 1          | 0                      | 14           | 15    |
| Total                  | 16         | 13                     | 16           | 45    |
| Overall Accuracy       |            |                        | 90%          |       |
| Overall Kappa          |            |                        | 0.93         |       |
| <b>Year 2008</b>       |            |                        |              |       |
| LULC Class             | Vegetation | Build Up and Bare Soil | Water Bodies | Total |
| Vegetation             | 14         | 1                      | 0            | 15    |
| Build Up and Bare Soil | 1          | 14                     | 0            | 15    |
| Water Bodies           | 0          | 0                      | 15           | 15    |
| Total                  | 15         | 15                     | 15           | 45    |
| Overall Accuracy       |            |                        | 93%          |       |
| Overall Kappa          |            |                        | 0.96         |       |
| <b>Year 2018</b>       |            |                        |              |       |
| LULC Class             | Vegetation | Build Up and Bare Soil | Water Bodies | Total |
| Vegetation             | 15         | 0                      | 0            | 15    |
| Build Up and Bare Soil | 0          | 13                     | 2            | 15    |
| Water Bodies           | 1          | 1                      | 13           | 15    |
| Total                  | 16         | 14                     | 15           | 45    |
| Overall Accuracy       |            |                        | 87%          |       |
| Overall Kappa          |            |                        | 0.91         |       |

257 I highly suggest the tables be restructured to show change in each class for all years on the same tables/Columns. This will make is easier to read and understand.

258 Using the GIS layer of land use categories, we also extracted the data for three classes within the golf  
 259 courses in comparison with the whole area (Table 2). Our analysis shows that while there was a  
 260 significant decrease in vegetation cover throughout the region, the total area of golf courses remained  
 261 unchanged at around 1,093 ha over the last 30 years.

262 **Figure 4. Land cover classification showing a detailed view of the Collier Park Golf**  
 263 **Course for a) Landsat data; b) NDVI values; c) Land cover classification**

264 *3.2 Spatial patterns of vegetation change*

265 To characterize spatial patterns of vegetation dynamics, we detected the vegetation loss and gain for  
 266 each of the three decades (Figure 5). In the period 1988 to 1998, deforestation occurred intensively in  
 267 the central and north regions. From 1998 to 2008, vegetation loss expanded to the north and south of the  
 268 city. However, in the last decade from 2008 to 2018, vegetation loss accelerated in the distal regions  
 269 with urbanization. However, there was also some vegetation gain over the three decades (Figure 5, Table  
 270 4) predominantly in the northern part of the city.

271 **Figure 5. Change in vegetation cover over the period 1988 to 2018 for the Perth region**

272 **Table 4. Vegetation loss and gain (ha) between 1988 and 2018.**

|              |                 | Period    |           |           |
|--------------|-----------------|-----------|-----------|-----------|
|              |                 | 1988-1998 | 1998-2008 | 2008-2018 |
| Whole Area   | Vegetation loss | 22,231    | 19,250    | 20,178    |
|              | Vegetation gain | 15,538    | 15,838    | 12,591    |
|              | Net loss        | 6,692     | 3,412     | 7,587     |
| Golf courses | Vegetation loss | 68        | 27        | 40        |
|              | Vegetation gain | 219       | 92        | 43        |
|              | Net gain        | 152       | 64        | 4         |

273  
 274 Calculation of changes within the golf courses and in the whole area (Table 4) showed that the major  
 275 urban area of Perth experienced a net loss in vegetation cover. Though vegetation compensation  
 276 occurred together with deforestation over 30 years of urbanization, the vegetation loss was always much  
 277 larger than vegetation gain with the largest net vegetation loss occurring in the last decade. However,  
 278 the golf courses showed a different trend where the net gain of vegetation cover happened over three  
 279 decades and the largest gain was between 1988 and 1998.

280 3.3 *Analysis of connectivity components of green space networks*

281 Results of the MSPA analysis indicate that the reduction in vegetation cover over the last thirty years  
282 has led to a decline in connectivity (Table 5) . Among the two MSPA classes that are important for  
283 connectivity (core and bridge), the total area of core class decreased by about 10% over three decades  
284 while the bridge class was maintained at around 37,000 ha, but the proportion of this class per total  
285 vegetation cover area (VCA) increased due to the reduction of vegetation cover over time (Table 5). This  
286 analysis also shows the fluctuation in the areas of the rest of the MSPA classes including islets, loops,  
287 edges, perforations, and branches which do not contribute to connectivity in the landscape. The  
288 proportion of these classes increased through time from 24% in 1988 to 30% in 2008 and 2018.

289 Figure 6 shows that the core area was distributed mostly in the northern part of the city and their areas  
290 decreased significantly in later years. In 1988, the bridge class covered a large area of the city's central  
291 region but this decreased over time. In recent years, most of the vegetation cover in the central region  
292 of the city belongs to the islet, loop, edge, perforation and branch classes, illustrating that isolation  
293 became more serious in the central region of the city over the three decades.

294 **Figure 6. Results of the Morphological Spatial Pattern Analysis (MSPA) for the Perth region**  
295 **from 1988 to 2018** 

296 The vegetation cover within golf courses also contributes to connectivity. The proportion of core area  
297 within golf courses fluctuated between 12% and 27%. Moreover, the largest proportion of vegetation in  
298 golf courses was classified as bridge but it experienced a downward trend from 52% to 41% in three  
299 decades. Of the remaining classes which do not contribute to connectivity, the edge and loop classes  
300 accounted for a higher proportion with each of them contributing 7% to 16% of total vegetation cover.

301  
302  
303  
304  
305  
306

307  
308

**Table 5. Results of Morphological Spatial Pattern Analysis (MSPA) analysis of connectivity of Perth’s vegetation from 1988 to 2018.**

| Landscape type | Year | Perth Metropolitan Region |                             | Within golf courses |                             |
|----------------|------|---------------------------|-----------------------------|---------------------|-----------------------------|
|                |      | Area (ha)                 | Proportion of total VCA (%) | Area (ha)           | Proportion of total VCA (%) |
| Core           | 1988 | 32,012                    | 32.6                        | 325                 | 23.2                        |
|                | 1998 | 20,607                    | 22.5                        | 171                 | 12.7                        |
|                | 2008 | 22,251                    | 25.3                        | 230                 | 16.7                        |
|                | 2018 | 18,101                    | 22.5                        | 383                 | 27.3                        |
| Bridge         | 1988 | 37,127                    | 37.9                        | 738                 | 52.6                        |
|                | 1998 | 39,412                    | 43.0                        | 814                 | 60.2                        |
|                | 2008 | 37,902                    | 43.1                        | 732                 | 53.1                        |
|                | 2018 | 37,503                    | 46.7                        | 588                 | 42.0                        |
| Islet          | 1988 | 10,396                    | 10.6                        | 31                  | 2.2                         |
|                | 1998 | 16,436                    | 17.9                        | 78                  | 5.8                         |
|                | 2008 | 12,922                    | 14.7                        | 15                  | 1.1                         |
|                | 2018 | 12,349                    | 15.4                        | 37                  | 2.7                         |
| Perforation    | 1988 | 1,099                     | 1.1                         | 3                   | 0.2                         |
|                | 1998 | 486                       | 0.5                         | -                   | -                           |
|                | 2008 | 834                       | 1.0                         | -                   | -                           |
|                | 2018 | 406                       | 0.5                         | 6                   | 0.4                         |
| Edge           | 1988 | 7,430                     | 7.6                         | 162                 | 11.5                        |
|                | 1998 | 4,814                     | 5.3                         | 95                  | 7.0                         |
|                | 2008 | 4,986                     | 5.7                         | 147                 | 10.7                        |
|                | 2018 | 5,218                     | 6.5                         | 230                 | 16.4                        |
| Loop           | 1988 | 5,670                     | 5.8                         | 112                 | 8.0                         |
|                | 1998 | 6,295                     | 6.9                         | 146                 | 10.8                        |
|                | 2008 | 5,607                     | 6.4                         | 209                 | 15.2                        |
|                | 2018 | 3,669                     | 4.6                         | 129                 | 9.2                         |
| Branch         | 1988 | 4,361                     | 4.5                         | 32                  | 2.3                         |
|                | 1998 | 3,619                     | 4.0                         | 47                  | 3.5                         |
|                | 2008 | 3,491                     | 4.0                         | 43                  | 3.2                         |
|                | 2018 | 3,117                     | 3.9                         | 29                  | 2.1                         |

309

## 310 **4 Discussion**

311 We used Landsat imagery to characterize the patterns of vegetation change, habitat connectivity and the  
312 role of golf courses in maintaining green spaces and connectivity in an urban landscape. We found that  
313 deforestation led to a reduction in habitat connectivity in the Perth Metropolitan Region. However, golf  
314 courses can play an important role in maintaining vegetation and supporting biodiversity connectivity  
315 in urban landscapes. Previous studies have documented the increase in the urban footprint of Perth using  
316 multi-temporal urban expansion statistics derived from Satellite imagery [58]; However, their work did  
317 not address the issues of vegetation dynamics, nor the biodiversity and structure of the vegetation and  
318 habitat connectivity in the Perth Metropolitan Region. Therefore, our study addresses this gap.

### 319 *4.1 Deforestation and urbanization*

320 The vegetation dynamics in the major urban areas of Perth reflect the pattern of urbanization over time.  
321 The reduction in green space found in this study can be explained as a close relation to the process of  
322 development in this city. Over the last three decades, urban development in Perth has taken place at an  
323  **unsustainable** rate [42]. In the early 1990s to 2006, Perth's population grew by around 1.8%, but the  
324 figure has nearly doubled since then [59]. Also, this study indicated that, from 1988 to 2018, Perth's  
325 urban footprint increased from 74,376 to 92,243 ha (Table 2) and is consistent with previous research  
326 in urban growth in this region [58]. In the last 20 years, on average, 740 ha/yr of urban and urban deferred  
327 zoned land was consumed by subdivision, and 830 ha/yr was consumed by construction in the Perth  
328 metropolitan area and nearby Peel region [60]. In addition to this expansion, the city has become denser  
329 with the construction of new residential dwellings in urbanised areas. Although vegetation gain occurred  
330 in some places as a result of natural increase in canopy cover as urban vegetation grows through the  
331 conservation efforts, vegetation offset from development projects (e.g. mining), the plantation programs  
332 of the government taking place in bare soils in some suburbs, and efforts to increase green spaces from  
333 private land owners, the vegetation loss associated with urbanization has been more significant.

334 The difference in spatial patterns of vegetation loss are also related to the urban plans of this city. Our  
335 results show that between 1988 and 1998, there was significant vegetation loss in the central region of  
336 the city which can be linked to The Corridor Plan [61]. Historically, Perth's development pattern from

337 1970s to 1990s was based on linear corridors stretching out from the city's core, with large non-urban  
338 wedges between each of these corridors [61]. However, from 1998 to 2008 and from 2008 to 2018,  
339 deforestation was more significant in the outer subregions north-west and south-west of the city due to  
340 the adoption of Metroplan [62]. Perth recently has been divided into subregional areas, rather than  
341 corridors for planning purposes. The two coastal subregions (the North-West and South-West) included  
342 in our study have consistently achieved higher rates of population growth under Metroplan [63].

343 Originally the region was covered by woodlands dominated by eucalypts and banksias and coastal heath  
344 interspersed with chains of wetlands. Perth is home to a rich biodiversity, with more than 1,700 species  
345 of flowering plants and iconic species of threatened fauna in the region [64]. Therefore, such  
346 deforestation for urbanization has resulted in the devastating loss of significant natural habitats in this  
347 biodiversity hotspot city, leading to the designation as an endangered ecological community by the  
348 Australian Government [41].

#### 349 **4.2 *Connectivity of green space networks in urban landscapes***

350 The MSPA analysis indicates that the loss of vegetation as a consequence of urban expansion has led to  
351 a marked reduction in connectivity of green space networks in the Perth urban landscape. As only cores  
352 (the stepping stones between forest habitat patches) and bridges (the structural corridors to link core  
353 areas) can contribute to the connectivity between the habitat areas in the landscape [65], the reduction  
354 of these areas in Perth associated with urbanization throughout the time indicates the high impact of  
355 urban development on habitat connectivity. This analysis also shows the increase in proportion of islets,  
356 which are totally isolated patches, and other classes (perforations, loops, branches, edges) that cannot  
357 reach a new core habitat area for originating the potential movement [65]. Clearly, expansion of Perth  
358 city has fragmented the remaining blocks of natural habitat and increased isolation of natural habitats.  
359 This may reduce population and gene flow among patches and may disrupt the connection between  
360 subpopulations and a large regional population [66] and thus threaten the long-term viability of relict  
361 populations.

362 Fragmentation was obvious in the central region of the city and in recent decades it has become more  
363 serious in the outer parts of the city. This is critical as Perth is within a globally recognised biodiversity

364 hotspot, which is home to rich biodiversity found nowhere else in the world. The connectivity in the  
365 major urban area of Perth is not only critical for the linkage of habitats within the Swan Coastal Plain  
366 but also for the connection of these coastal habitats to a large regional biosphere in south-western  
367 Australia.

368 The results also illustrated that a 'Core' area and a network of 'Bridge' types exist in the central and  
369 outer subregions of Perth. This is the consequence of early conservation efforts of the government which  
370 created protected areas such as Kings Park, Bold Park and other significant areas. Very few cities in the  
371 world have such large areas of natural bushland in the centre of a big city [67]. However, future urban  
372 growth will continue to put pressure on the biodiversity. If current policies (Perth and Peel@3.5million)  
373 are fully implemented, existing stocks of urban and urban deferred land would be consumed by about  
374 2075 [68]. The challenge for urban planning to preserve urban forests and biodiversity is thus increasing,  
375 and it is clear that planning for future expansion should also include large protected areas.

376 Our MSPA output with spatial distribution of seven classes provides fundamental information for future  
377 urban planning. There is a need to maintain important green spaces which are classified as cores and  
378 bridges in the city, especially in the central region where most of the natural vegetation exists as islands.  
379 Also, the MSPA branch classes can be used to identify candidate ecological restoration areas. The  
380 branch class can be thought of [69] as a foundation of a potential corridor that could, if revegetated,  
381 connect two spatially disjunct core areas to improve connectivity in the larger region.

382 Although other analyses, such as functional connectivity, should be taken into account in landscape  
383 connectivity assessment [32], the structural connectivity analysis in this study will be useful for  
384 determining the priority protection level and critical areas of the connecting corridor, informing  
385 conservation strategies at a variety of scales, especially when the biodiversity values of this region are  
386 suffering from various threats including deforestation, feral animals, weed incursions, more frequent  
387 fires through arson and tree disease [64].



### 388 4.3 *The role of golf courses in maintaining urban forest*

389 Our study indicates that golf courses account for a significant proportion of the urban area of Perth. This  
390 category of land use has been vital in maintaining green space in urban areas over the past thirty years.  
391 In contrast to the overall decline in urban green space,  golf courses have preserved green spaces within  
392 urban settings and even created a net gain of vegetation cover over time. The highest net gain was seen  
393 in the period between 1988 to 1998 when some golf courses were established resulting in the planting  
394 of trees.

395 In the green ‘matrix’ of Perth, golf courses with their significant area of vegetation cover have  
396 contributed considerably to the connectivity in the urban landscape. A significant proportion of their  
397 green space was classified as core or bridge categories. The proportion of vegetation within golf courses  
398 classified as bridges was higher than in the whole study area. Golf courses with large areas of native  
399 vegetation provide “links” to other large natural patches of urban vegetation.

400 Although there are concerns with the environmentally negative impacts of golf courses as a source of  
401 pollution through pesticide and fertiliser usage [22], habitat modification [25] and high water usage [70],  
402 previous studies provide evidence about the biological values of golf courses, such as providing refugial  
403 habitat for urban-avoiding wildlife [24, 71-79]. Our study indicates that golf courses in urban settings  
404 have been maintaining large green-area habitats and played an important role in biodiversity  
405 connectivity in the city.

### 406 4.4 *Monitoring urban forest dynamics*

407 In this study, we utilized medium-resolution satellite remote sensing data to identify land use classes,  
408 characterise vegetation dynamics and connectivity. The data maps the spatial and temporal patterns of  
409 land use types characterizing a consistent, detailed vegetation dynamic of the city [58, 80]. Clearly, the  
410 biophysical elements of urban landscapes are well-reflected through physical features (NDVI) derived  
411 from remote sensing data with an accuracy of up to 89%.

412 Despite these kinds of data, it is hard to describe the detailed information of ecosystem such as species  
413 composition and forest structure. However, they show their advantage in mapping land cover dynamics

414 across large areas of big cities over time when high resolution imagery is not available. For monitoring  
415 urban forests in big cities, the large scale and long temporal datasets are more advantageous compared  
416 with datasets that focus only on discerning a specific land use type in a relatively small area [27, 81,  
417 82]. This is because it allows spatially detailed identification of changes associated with development  
418 over time. Therefore, the approach described in this paper provides baseline information for sustainable  
419 urban planning and development. In addition, the MSPA analysis can further evaluate the dynamic of  
420 vegetation cover by the describing the spatial configuration of ecosystems at the pixel level, detecting  
421 changes of habitat connectivity over time [32].

## 422 **5 Conclusions**

423 With rapid urban expansion, the most meaningful question to address is how to balance urban  
424 development and urban forest preservation. Urbanization requiring deforestation is inevitable in many  
425 cities worldwide. Our study found a significant loss of vegetation cover in a biodiversity hotspot over  
426 three decades of urbanization, which led to a reduction in habitat connectivity in the urban landscape. A  
427 lesson learned from the experience of urbanization in Perth is that any future urban growth following  
428 the patterns observed over the past three decades will continue to put pressure on maintaining urban  
429 forest ecosystems and biodiversity conservation. As cities continue to grow in response to socio-  
430 economic development, considering all opportunities for urban biodiversity conservation is important.  
431 Urban conservation strategies must therefore consider not only the protected areas, but also the off-  
432 reserve sites.

433 Our study indicates that golf courses in urban settings have been maintaining green-area habitats and  
434 have played an important role in biodiversity connectivity in the city. Potentially, urban golf courses  
435 could become more purposefully managed for biodiversity conservation and the improvement of critical  
436 ecosystem services in urban areas. In rapidly urbanizing biodiversity hotspots like Perth, where  
437 fragmentation is one the biggest threats to biodiversity, the way that golf courses contribute to increase  
438 the connectivity in the intervening urban matrix should not be underestimated. Therefore, it is important  
439 for government authorities and golf courses owners to pay more attention in maintaining ecosystem  
440 health in urban golf courses.

441 **6 Acknowledgments**

442 The authors thank Dr. Harry Eslick for his valuable advice in helping to design the research and Mr.  
443 Pham Dang Manh Hong Luan for his advice in data analysis. The research was supported by the  
444 Vietnamese Ministry of Education and Training and Murdoch University through a VIED-MU joint  
445 PhD scholarship to the first author.

446 **7 References**

- 447 1. Tabea TaE, Knop. A landscape ecology approach identifies important drivers of urban  
448 biodiversity. *Global Change Biol.* 2015;21 (4):1652-67.
- 449 2. Bagan H, Yamagata Y. Land-cover change analysis in 50 global cities by using a combination  
450 of Landsat data and analysis of grid cells. *Environmental Research Letters.* 2014;9(6):064015. doi:  
451 10.1088/1748-9326/9/6/064015.
- 452 3. UNDESA UNDoEaSA. World urbanization prospects: The 2011 revision. United Nations  
453 Department of Economic and Social Affairs/Population Division, New York: 2012.
- 454 4. McGrane SJ. Impacts of urbanisation on hydrological and water quality dynamics, and urban  
455 water management: a review. *Hydrological Sciences Journal.* 2016;61(13):2295-311. doi:  
456 10.1080/02626667.2015.1128084.
- 457 5. Gaston KJ, Ávila-Jiménez ML, Edmondson JL. REVIEW: Managing urban ecosystems for goods  
458 and services. *Journal of Applied Ecology.* 2013;50(4):830-40. doi: 10.1111/1365-2664.12087.
- 459 6. Declet-Barreto J, Brazel AJ, Martin CA, Chow WTL, Harlan SL. Creating the park cool island in  
460 an inner-city neighborhood: heat mitigation strategy for Phoenix, AZ. *Urban Ecosystems.*  
461 2013;16(3):617-35. doi: 10.1007/s11252-012-0278-8.
- 462 7. Scott AA, Misiani H, Okoth J, Jordan A, Gohlke J, Ouma G, et al. Temperature and heat in  
463 informal settlements in Nairobi. *PLOS ONE.* 2017;12(11):e0187300. doi:  
464 10.1371/journal.pone.0187300.
- 465 8. Van Den Berg AE, Custers MHG. Gardening promotes neuroendocrine and affective  
466 restoration from stress. *Journal of Health Psychology.* 2010;16(1):1359-053.
- 467 9. Mitchell R. Is physical activity in natural environments better for mental health than physical  
468 activity in other environments? *Social Science & Medicine.* 2013;91(Supplement C):130-4. doi:  
469 <https://doi.org/10.1016/j.socscimed.2012.04.012>.
- 470 10. Donovan GH, Butry DT, Michael YL, Prestemon JP, Liebhold AM, Gatzliolis D, et al. The  
471 relationship between trees and human health: Evidence from the spread of the emerald ash borer.  
472 *American Journal of Preventive Medicine.* 2013;44(2):139-45. doi:  
473 <https://doi.org/10.1016/j.amepre.2012.09.066>.
- 474 11. Ulrich RS. View through a window may influence recovery from surgery. *Science.*  
475 1984;224(4647):420.
- 476 12. Cecily Jane M. Promoting children's mental, emotional and social health through contact  
477 with nature: a model. *Health Education.* 2009;109(6):522-43. doi: 10.1108/09654280911001185.
- 478 13. Lee KE, Williams KJH, Sargent LD, Williams NSG, Johnson KA. 40-second green roof views  
479 sustain attention: The role of micro-breaks in attention restoration. *Journal of Environmental*  
480 *Psychology.* 2015;42(Supplement C):182-9. doi: <https://doi.org/10.1016/j.jenvp.2015.04.003>.
- 481 14. Kim G. Assessing Urban Forest Structure, Ecosystem Services, and Economic Benefits on  
482 Vacant Land. *Sustainability.* 2016;8(7):679. PubMed PMID: doi:10.3390/su8070679.
- 483 15. Zitkovic M. Managing green spaces for urban biodiversity. Boulevard Louis Schmidt 64 1040  
484 Brussels, Belgium: Countdown 2010 Secretariat, IUCN Regional Office for Europe, 2008.

- 485 16. Seitz J, Escobedo F. Urban forests in Florida: Trees control stormwater runoff and improve  
486 water quality. University of Florida, Institute of Food and Agricultural Sciences. IFAS Extension  
487 Publication FOR184.2014.
- 488 17. Bailey D, Schmidt-Entling MH, Eberhart P, Herrmann JD, Hofer G, Kormann U, et al. Effects of  
489 habitat amount and isolation on biodiversity in fragmented traditional orchards. *Journal of Applied  
490 Ecology*. 2010;47(5):1003-13. doi: 10.1111/j.1365-2664.2010.01858.x.
- 491 18. Yu D, Liu Y, Xun B, Shao H. Measuring Landscape Connectivity in a Urban Area for Biological  
492 Conservation. *CLEAN – Soil, Air, Water*. 2015;43(4):605-13. doi: 10.1002/clen.201200448.
- 493 19. Bierwagen B. Connectivity in urbanizing landscapes: The importance of habitat configuration,  
494 urban area size, and dispersal2007. 29-42 p.
- 495 20. Lindenmayer D, Franklin J. Conserving forest biodiversity: a comprehensive multiscaled  
496 approach2002.
- 497 21. Napton DE, Laingen CR. Expansion of Golf Courses in the United States. *Geographical Review*.  
498 2008;98(1):24-41.
- 499 22. Guzmán C, & Fernández, D., Javier Mesa. Environmental impaccts by golf courses and  
500 strategies to minimize them: state of the art. *International Journal of Arts & Sciences*. 2014;7(3):403-  
501 17.
- 502 23. Colding J, Folke C. The Role of Golf Courses in Biodiversity Conservation and Ecosystem  
503 Management. *Ecosystems*. 2009;12(2):191-206. doi: 10.1007/s10021-008-9217-1.
- 504 24. Hodgkison SC, Hero JM, Warnken J. The conservation value of suburban golf courses in a  
505 rapidly urbanising region of Australia. *Landscape and Urban Planning*. 2007;79(3):323-37. doi:  
506 <https://doi.org/10.1016/j.landurbplan.2006.03.009>.
- 507 25. Terman MR. Natural links: naturalistic golf courses as wildlife habitat. *Landscape and Urban  
508 Planning*. 1997;38(3):183-97. doi: [https://doi.org/10.1016/S0169-2046\(97\)00033-9](https://doi.org/10.1016/S0169-2046(97)00033-9).
- 509 26. Puglis HJ, Boone MD. Effects of Terrestrial Buffer Zones on Amphibians on Golf Courses. *PLOS  
510 ONE*. 2012;7(6):e39590. doi: 10.1371/journal.pone.0039590.
- 511 27. Theobald DM. Development and Applications of a Comprehensive Land Use Classification  
512 and Map for the US. *PLOS ONE*. 2014;9(4):e94628. doi: 10.1371/journal.pone.0094628.
- 513 28. Hu T, Yang J, Li X, Gong P. Mapping Urban Land Use by Using Landsat Images and Open Social  
514 Data. *Remote Sensing*. 2016;8(2):151. PubMed PMID: doi:10.3390/rs8020151.
- 515 29. Li X, Liu X, Gong P. Integrating ensemble-urban cellular automata model with an uncertainty  
516 map to improve the performance of a single model. *International Journal of Geographical  
517 Information Science*. 2015;29(5):762-85. doi: 10.1080/13658816.2014.997237.
- 518 30. Tucker CJ. Red and photographic infrared linear combinations for monitoring vegetation.  
519 *Remote Sensing of Environment*. 1979;8(2):127-50. doi: [https://doi.org/10.1016/0034-  
520 4257\(79\)90013-0](https://doi.org/10.1016/0034-4257(79)90013-0).
- 521 31. Myneni RB, Hall FG, Sellers PJ, Marshak AL. The interpretation of spectral vegetation indexes.  
522 *IEEE Transactions on Geoscience and Remote Sensing*. 1995;33(2):481-6. doi:  
523 10.1109/TGRS.1995.8746029.
- 524 32. Vogt P, Riitters K, Estreguil C, Kozak J, G. Wade T, Wickham J. Mapping Spatial Patterns with  
525 Morphological Image Processing2007. 171-7 p.
- 526 33. Myers N, Mittermeier RA, Mittermeier CG, da Fonseca GAB, Kent J. Biodiversity hotspots for  
527 conservation priorities. *Nature*. 2000;403(6772):853-8. doi: 10.1038/35002501.
- 528 34. Kottek MG, Jürgen; Beck, Christoph; Rudolf, Bruno; Rubel, Franz. World Map of the K \ o  
529 ppen-Geiger climate classification updated. *Meteorologische Zeitschrift*. 2006;15(3):259-63. doi:  
530 10.1127/0941-2948/2006/0130.
- 531 35. Hope PK, Drosowsky W, Nicholls N. Shifts in the synoptic systems influencing southwest  
532 Western Australia. *Climate Dynamics*. 2006;26(7):751-64. doi: 10.1007/s00382-006-0115-y.
- 533 36. Mittermeier R, Gil P, Hoffmann M, Pilgrim J, Brooks T, Mittermeier C, et al. Hotspots  
534 Revisited. *Earth's Biologically Richest and Most Endangered Terrestrial Ecoregions2004*.
- 535 37. Environmental Protection Act 1986, (1986).

- 536 38. Environment Protection and Biodiversity Conservation Act 1999 (EPBC Act), (1999).
- 537 39. Australia GoW. Bush Forever Volume 1: Policies, principles and processes. In: Protection  
538 MfPaDoE, editor. Perth, WA.2000a.
- 539 40. Australia GoW. Bush Forever Volume 2: Directory of Bush Forever sites. In: Protection  
540 MfPaDoE, editor. Perth, WA.2000b.
- 541 41. Environment Dot. Shrublands and Woodlands of the eastern Swan Coastal Plain in  
542 Community and Species Profile and Threats Database. In: Environment Dot, editor. Canberra.2016.
- 543 42. Dhakal SP. Glimpses of sustainability in Perth, Western Australia: Capturing and  
544 communicating the adaptive capacity of an activist group. *Consilience: The Journal of Sustainable  
545 Development*. 2014;11(1):167–82.
- 546 43. Song C, Woodcock CE, Seto KC, Lenney MP, Macomber SA. Classification and Change  
547 Detection Using Landsat TM Data: When and How to Correct Atmospheric Effects? *Remote Sensing  
548 of Environment*. 2001;75(2):230-44. doi: [https://doi.org/10.1016/S0034-4257\(00\)00169-3](https://doi.org/10.1016/S0034-4257(00)00169-3).
- 549 44. Cui L, Li G, Ren H, He L, Liao H, Ouyang N, et al. Assessment of atmospheric correction  
550 methods for historical Landsat TM images in the coastal zone: A case study in Jiangsu, China.  
551 *European Journal of Remote Sensing*. 2014;47(1):701-16. doi: 10.5721/EuJRS20144740.
- 552 45. Lu D, Mausel P, Brondizio E, Moran E. Assessment of atmospheric correction methods for  
553 Landsat TM data applicable to Amazon basin LBA research. *International Journal of Remote Sensing*.  
554 2002;23(13):2651-71. doi: 10.1080/01431160110109642.
- 555 46. Gilmore S, Saleem A, Dewan A. Effectiveness of DOS (Dark-Object Subtraction) method and  
556 water index techniques to map wetlands in a rapidly urbanising megacity with Landsat 8 data. *CEUR  
557 Workshop Proceedings*. 2015;1323:100-8.
- 558 47. Nazeer M, Nichol J. Selection of atmospheric correction method and estimation of  
559 Chlorophyll-A (Chl-a) in coastal waters of Hong Kong. 3rd International Workshop on Earth  
560 Observation and Remote Sensing Applications, EORSA 2014 - Proceedings. 2014:374-8. doi:  
561 10.1109/EORSA.2014.6927916.
- 562 48. Yusuf FR, Santoso KB, Ningam MUL, Kamal M, Wicaksono P. Evaluation of atmospheric  
563 correction models and Landsat surface reflectance product in Daerah Istimewa Yogyakarta,  
564 Indonesia. *IOP Conference Series: Earth and Environmental Science*. 2018;169:012004. doi:  
565 10.1088/1755-1315/169/1/012004.
- 566 49. Dewi E, Trisakti B. COMPARING ATMOSPHERIC CORRECTION METHODS FOR LANDSAT OLI  
567 DATA. *International Journal of Remote Sensing and Earth Sciences (IJReSES)*. 2017;13:105. doi:  
568 10.30536/j.ijreses.2016.v13.a2472.
- 569 50. Mohajane M, Essahlaoui A, Oudija F, Hafyani ME, Hmadi AE, Ouali AE, et al. Land Use/Land  
570 Cover (LULC) Using Landsat Data Series (MSS, TM, ETM+ and OLI) in Azrou Forest, in the Central  
571 Middle Atlas of Morocco. *Environments*. 2018;5(12):131. PubMed PMID:  
572 doi:10.3390/environments5120131.
- 573 51. Gu D, Gillespie A. Topographic Normalization of Landsat TM Images of Forest Based on  
574 Subpixel Sun–Canopy–Sensor Geometry. *Remote Sensing of Environment*. 1998;64(2):166-75. doi:  
575 [https://doi.org/10.1016/S0034-4257\(97\)00177-6](https://doi.org/10.1016/S0034-4257(97)00177-6).
- 576 52. Herring JWaD. Measuring Vegetation (NDVI & EVI) 2000. Available from:  
577 <https://earthobservatory.nasa.gov/features/MeasuringVegetation>.
- 578 53. Cha S-Y, Park C-H. The utilization of google earth images as reference data for the  
579 multitemporal land cover classification with MODIS data of North Korea.2007.
- 580 54. Pascual-Hortal L, Saura S. Comparison and development of new graph-based landscape  
581 connectivity indices: towards the prioritization of habitat patches and corridors for conservation.  
582 *Landscape Ecology*. 2006;21(7):959-67. doi: 10.1007/s10980-006-0013-z.
- 583 55. Saornil J, Gutiérrez J, Hernando A, Abril A, Sánchez B, Aparicio M. Structural connectivity as  
584 an indicator of species richness and landscape diversity in Castilla y León (Spain)2019. 286-97 p.
- 585 56. Wickham JD, Riitters KH, Wade TG, Vogt P. A national assessment of green infrastructure and  
586 change for the conterminous United States using morphological image processing. 2010.

- 587 57. Shi X, Qin M. Research on the Optimization of Regional Green Infrastructure Network.  
588 Sustainability. 2018;10(12):4649. PubMed PMID: doi:10.3390/su10124649.
- 589 58. MacLachlan A, Biggs E, Roberts G, Boruff B. Urban Growth Dynamics in Perth, Western  
590 Australia: Using Applied Remote Sensing for Sustainable Future Planning. Land. 2017;6(1):9. PubMed  
591 PMID: doi:10.3390/land6010009.
- 592 59. WorldPopulationReview. Perth Population 2019 2019 [21 February 2019]. Available from:  
593 <http://worldpopulationreview.com/world-cities/perth-population/>.
- 594 60. Commission WAP. Urban Growth Monitor Perth Metropolitan, Peel and Greater Bunbury  
595 Regions. In: WAPC WAPC, editor. Gordon Stephenson House 140 William Street Perth WA 6000: the  
596 Western Australian Planning Commission; 2019.
- 597 61. Authority MRP. The Corridor Plan for Perth. In: Authority MRP, editor. Perth, WA1970.
- 598 62. Development DoPaU. Metroplan: A planning strategy for the Perth Metropolitan Region. In:  
599 Development DoPaU, editor. Perth, WA.1990.
- 600 63. Bureau of Infrastructure TaREB. Population growth, jobs growth and commuting flows in  
601 Perth, . In: Transport Dola, editor. Canberra ACT 2010.
- 602 64. Department of Biodiversity CaA. A methodology for the evaluation of wetlands on the Swan  
603 Coastal Plain, draft prepared by the Wetlands Section of the Department of Biodiversity. In:  
604 Regulation CaAatUWBotDoWaE, editor. Perth, WA2017.
- 605 65. Saura S, Vogt P, Velázquez J, Hernando A, Tejera R. Key structural forest connectors can be  
606 identified by combining landscape spatial pattern and network analyses. Forest Ecology and  
607 Management. 2011;262(2):150-60. doi: <https://doi.org/10.1016/j.foreco.2011.03.017>.
- 608 66. Morjan CL, Rieseberg LH. How species evolve collectively: implications of gene flow and  
609 selection for the spread of advantageous alleles. Molecular ecology. 2004;13(6):1341-56. doi:  
610 10.1111/j.1365-294X.2004.02164.x. PubMed PMID: 15140081.
- 611 67. Green T. Perth's Urban Forest: A WA2.0 Project 2018.
- 612 68. Commission WAP. Perth and Peel @ 3.5 Million. In: Department of Planning GoWA, editor.  
613 Perth,WA, Australia2015.
- 614 69. Wickham J, Riitters K, Vogt P, Costanza J, Neale A. An inventory of continental U.S. terrestrial  
615 candidate ecological restoration areas based on landscape context2017.
- 616 70. Neylan J. Improving The Environmental Management of New South Wales Golf courses. In:  
617 NSW DoEaCC, editor. 59–61 Goulburn Street, Sydney, PO Box A290.
- 618 71. Deslauriers MR, Asgary A, Nazarnia N, Jaeger JAG. Implementing the connectivity of natural  
619 areas in cities as an indicator in the City Biodiversity Index (CBI). Ecological Indicators. 2017. doi:  
620 <https://doi.org/10.1016/j.ecolind.2017.02.028>.
- 621 72. Dobbs EK, Potter DA. Naturalized habitat on golf courses: source or sink for natural enemies  
622 and conservation biological control? Urban Ecosystems. 2016;19(2):899-914. doi: 10.1007/s11252-  
623 015-0521-1.
- 624 73. Saarikivi J, Tähtinen S, Malmberg S, Kotze DJ. Converting land into golf courses – effects on  
625 ground beetles (Coleoptera, Carabidae). Insect Conservation and Diversity. 2015;8(3):247-51. doi:  
626 10.1111/icad.12103.
- 627 74. Chester ET, Robson BJ. Anthropogenic refuges for freshwater biodiversity: Their ecological  
628 characteristics and management. Biological Conservation. 2013;166(Supplement C):64-75. doi:  
629 <https://doi.org/10.1016/j.biocon.2013.06.016>.
- 630 75. Saarikivi J, Idström L, Venn S, Niemelä J, Kotze DJ. Carabid beetle assemblages associated  
631 with urban golf courses in the greater Helsinki area. European Journal of Entomology.  
632 2010;107(4):553-61. PubMed PMID: 814377100.
- 633 76. Hudson M-AR, Bird DM. Recommendations for design and management of golf courses and  
634 green spaces based on surveys of breeding bird communities in Montreal. Landscape and Urban  
635 Planning. 2009;92(3):335-46. doi: <https://doi.org/10.1016/j.landurbplan.2009.05.017>.
- 636 77. Colding J, Lundberg J, Lundberg S, Andersson E. Golf courses and wetland fauna. Ecological  
637 Applications. 2009;19(6):1481-91. doi: 10.1890/07-2092.1.

- 638 78. Burgin S, Wotherspoon D. The potential for golf courses to support restoration of biodiversity  
639 for BioBanking offsets. *Urban Ecosystems*. 2009;12(2):145-55. doi: 10.1007/s11252-008-0076-5.
- 640 79. Tanner RA, Gange AC. Effects of golf courses on local biodiversity. *Landscape and Urban*  
641 *Planning*. 2005;71(2):137-46. doi: <https://doi.org/10.1016/j.landurbplan.2004.02.004>.
- 642 80. Angiuli E, Trianni G. Urban Mapping in Landsat Images Based on Normalized Difference  
643 Spectral Vector. *IEEE Geoscience and Remote Sensing Letters*. 2014;11(3):661-5. doi:  
644 10.1109/LGRS.2013.2274327.
- 645 81. Wu S-S, Qiu X, Usery EL, Wang L. Using Geometrical, Textural, and Contextual Information of  
646 Land Parcels for Classification of Detailed Urban Land Use. *Annals of the Association of American*  
647 *Geographers*. 2009;99(1):76-98. doi: 10.1080/00045600802459028.
- 648 82. Toole JL, Ulm M, González MC, Bauer D, editors. *Inferring land use from mobile phone*  
649 *activity*. *Proceedings of the ACM SIGKDD international workshop on urban computing*; 2012: ACM.

650

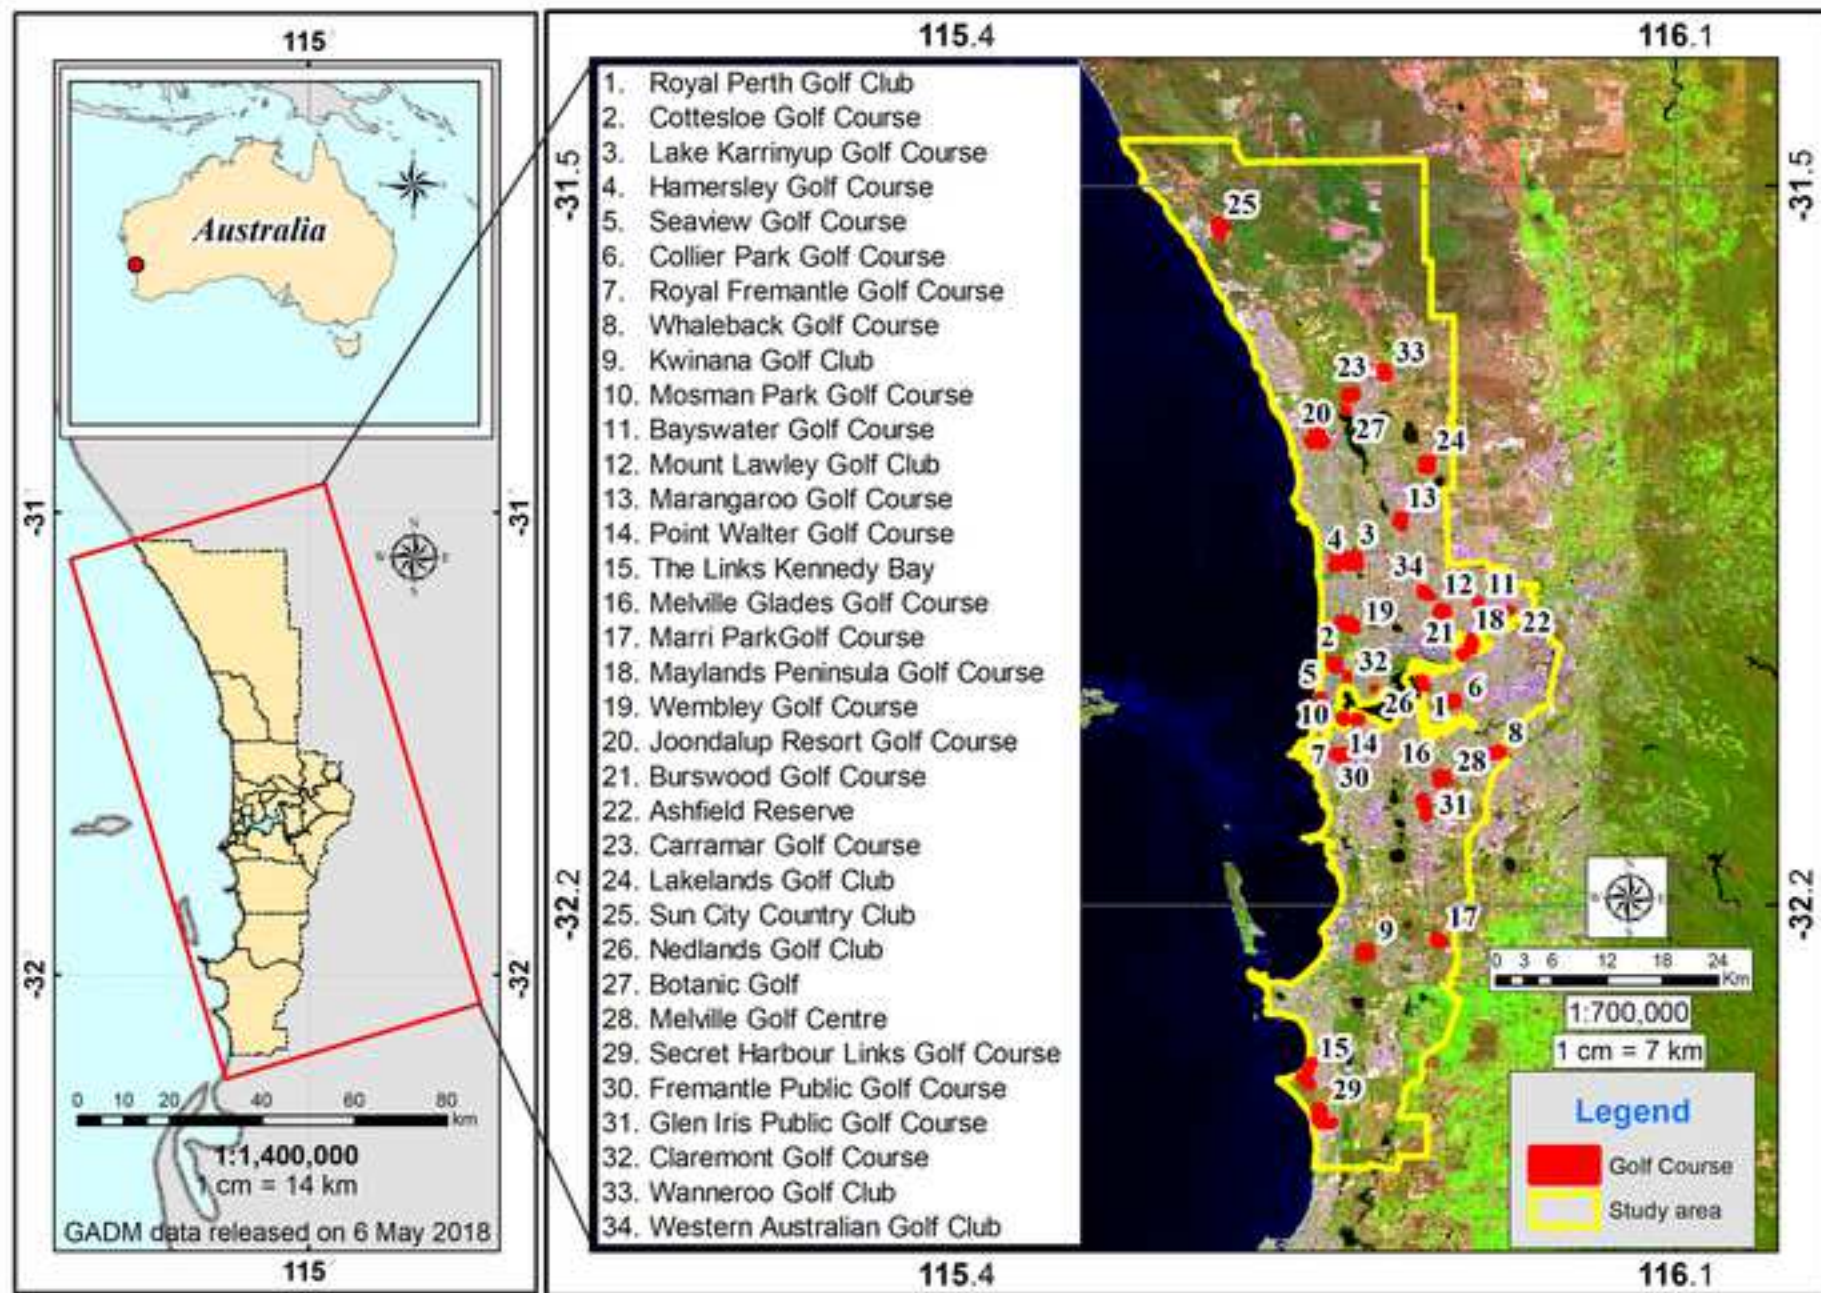



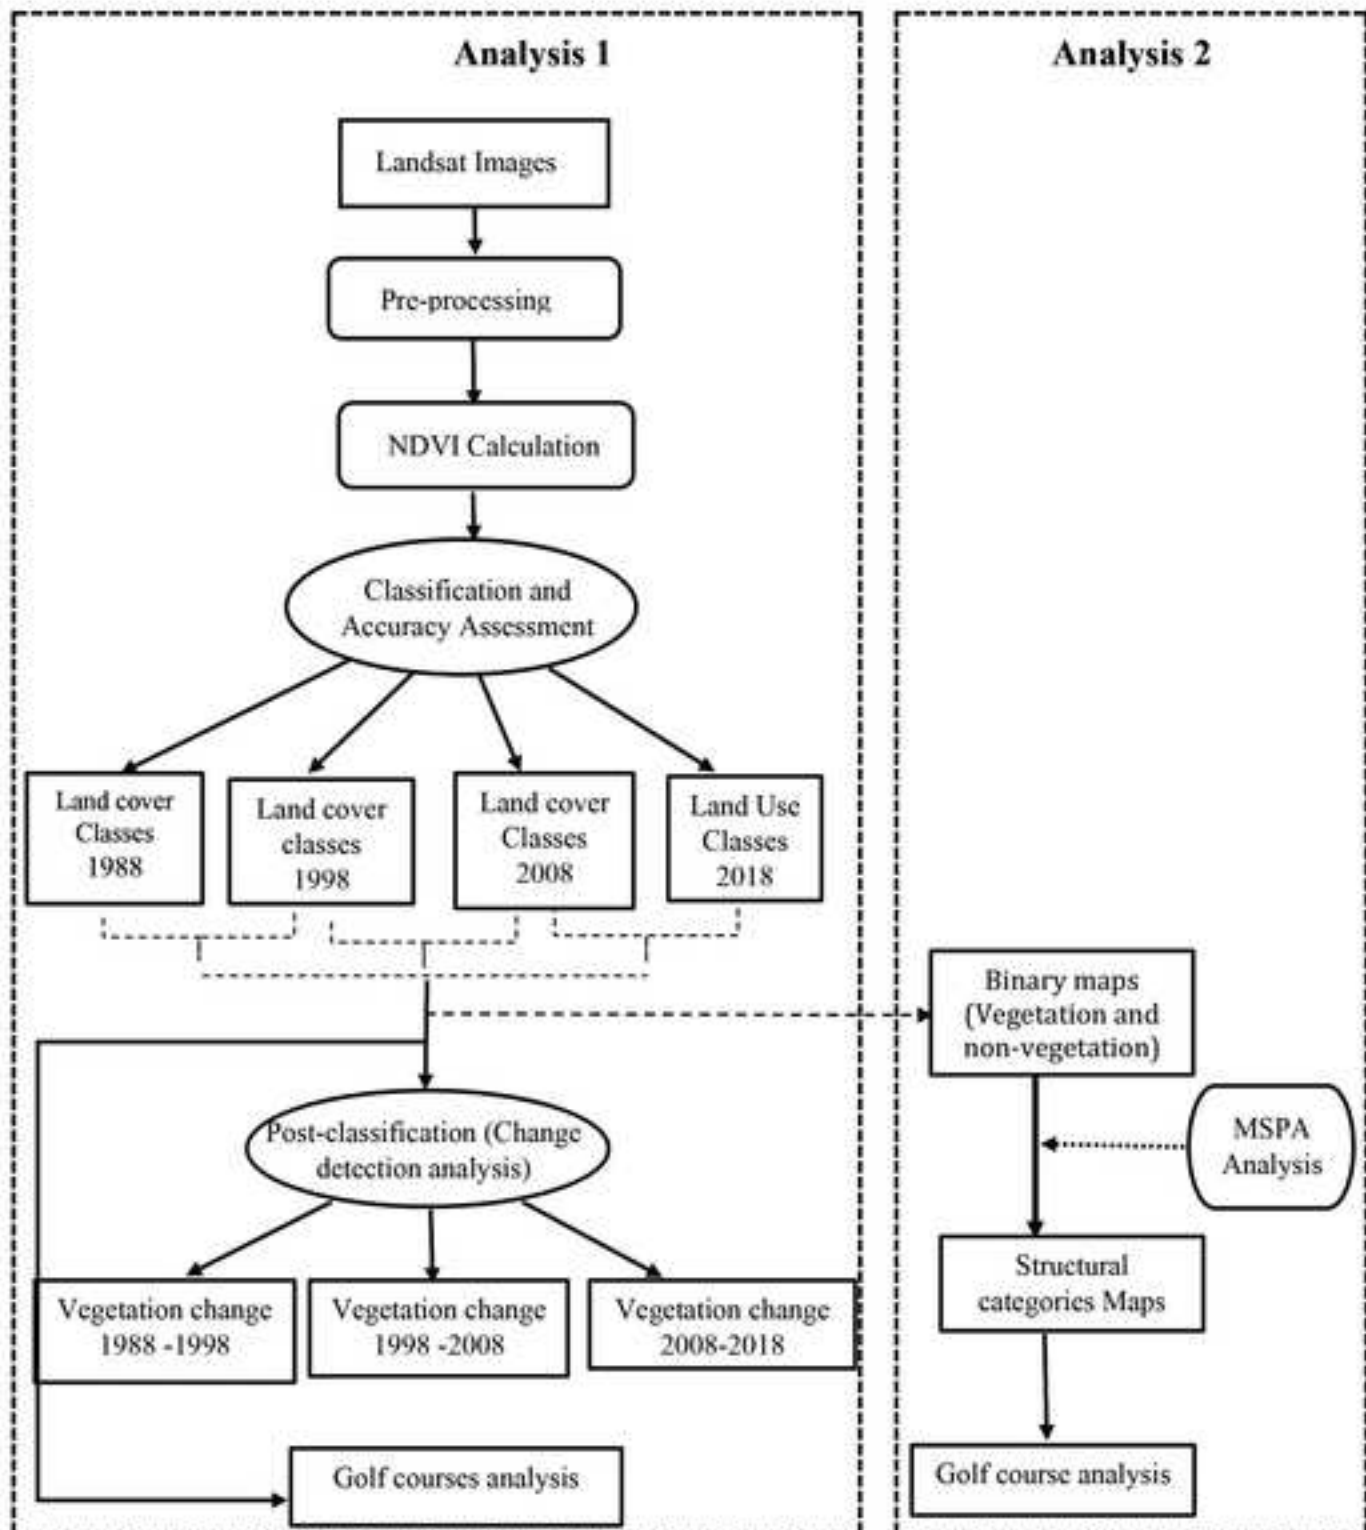

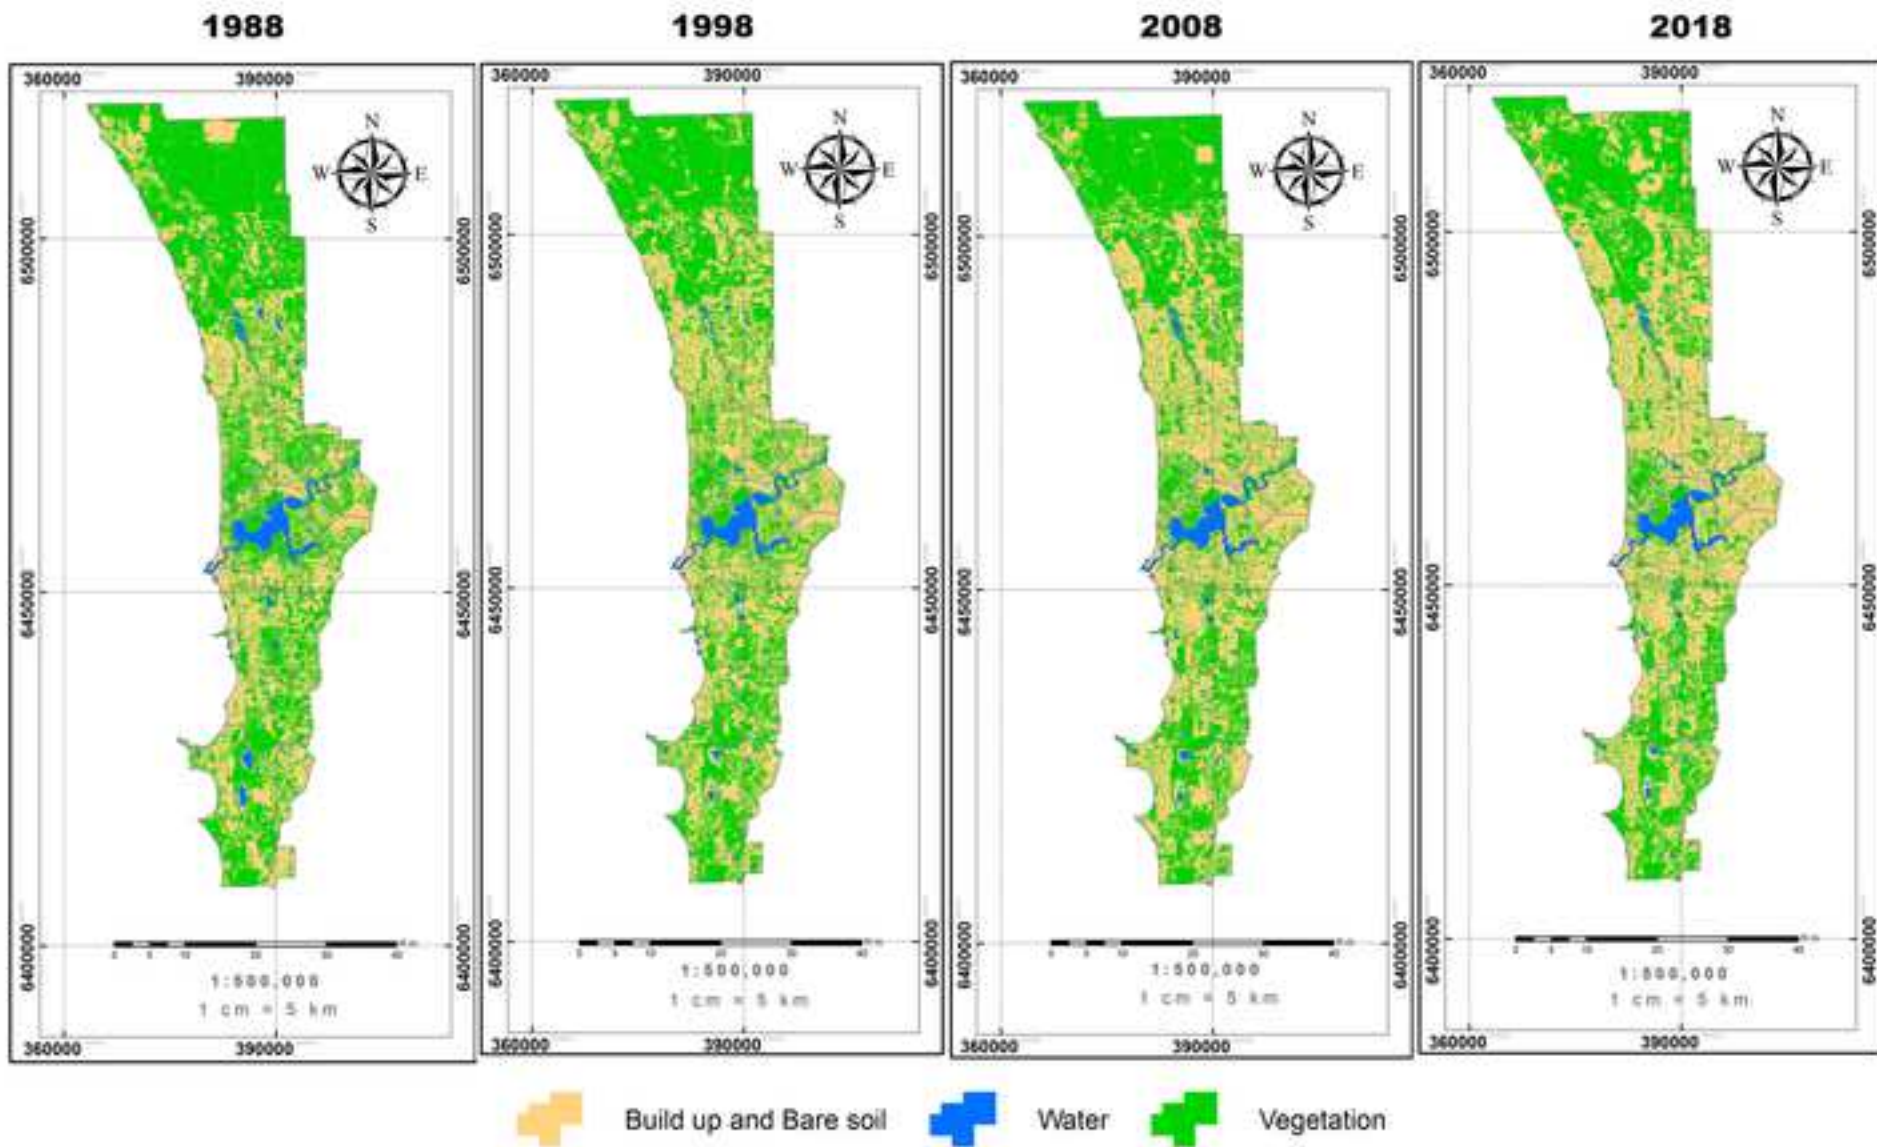

**a. Landsat Image**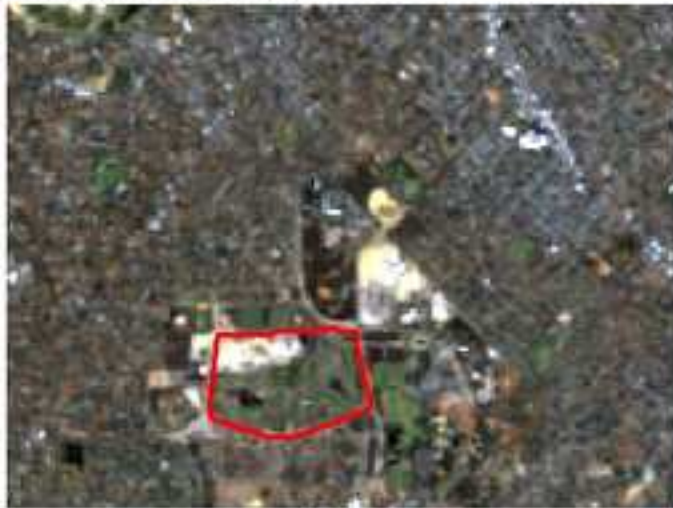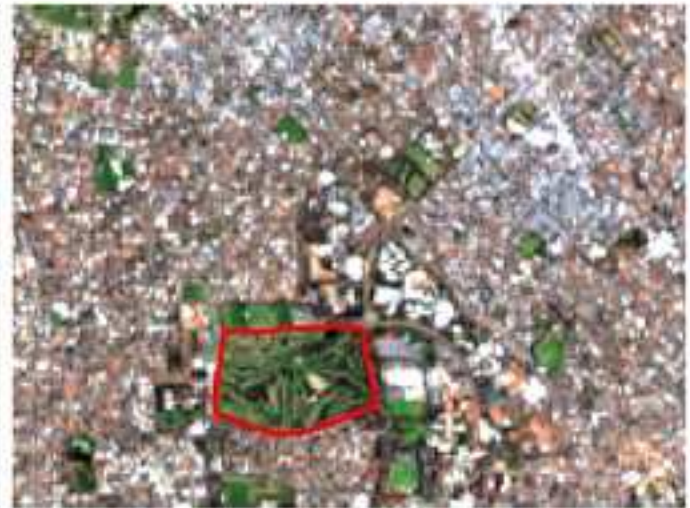**b. NDVI Value**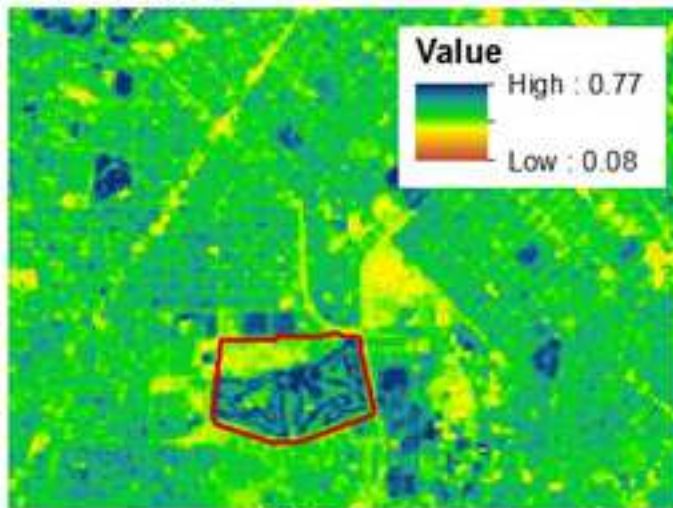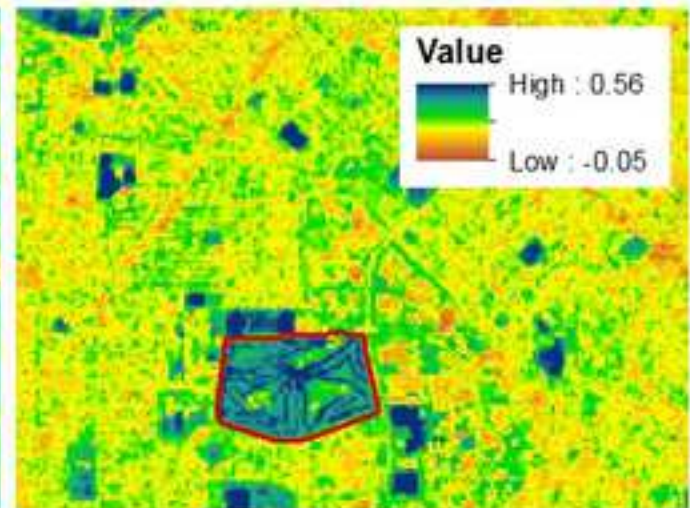**c. Land cover classification**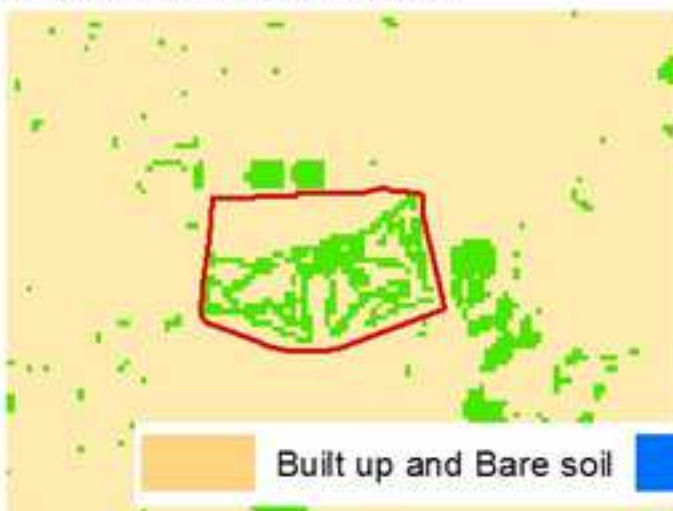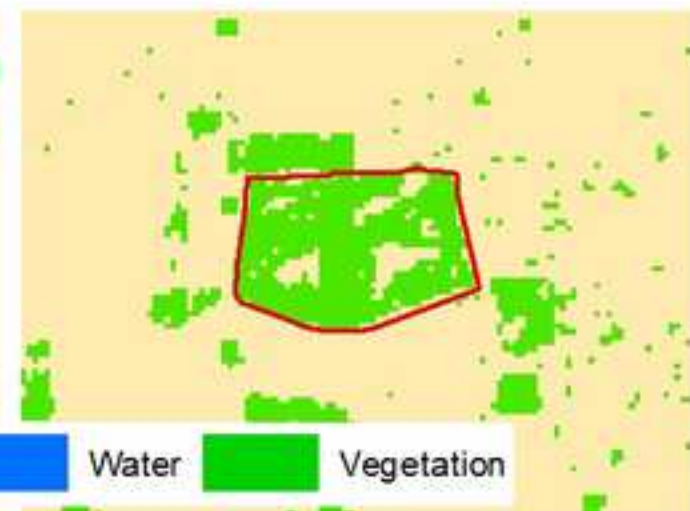

Built up and Bare soil Water Vegetation

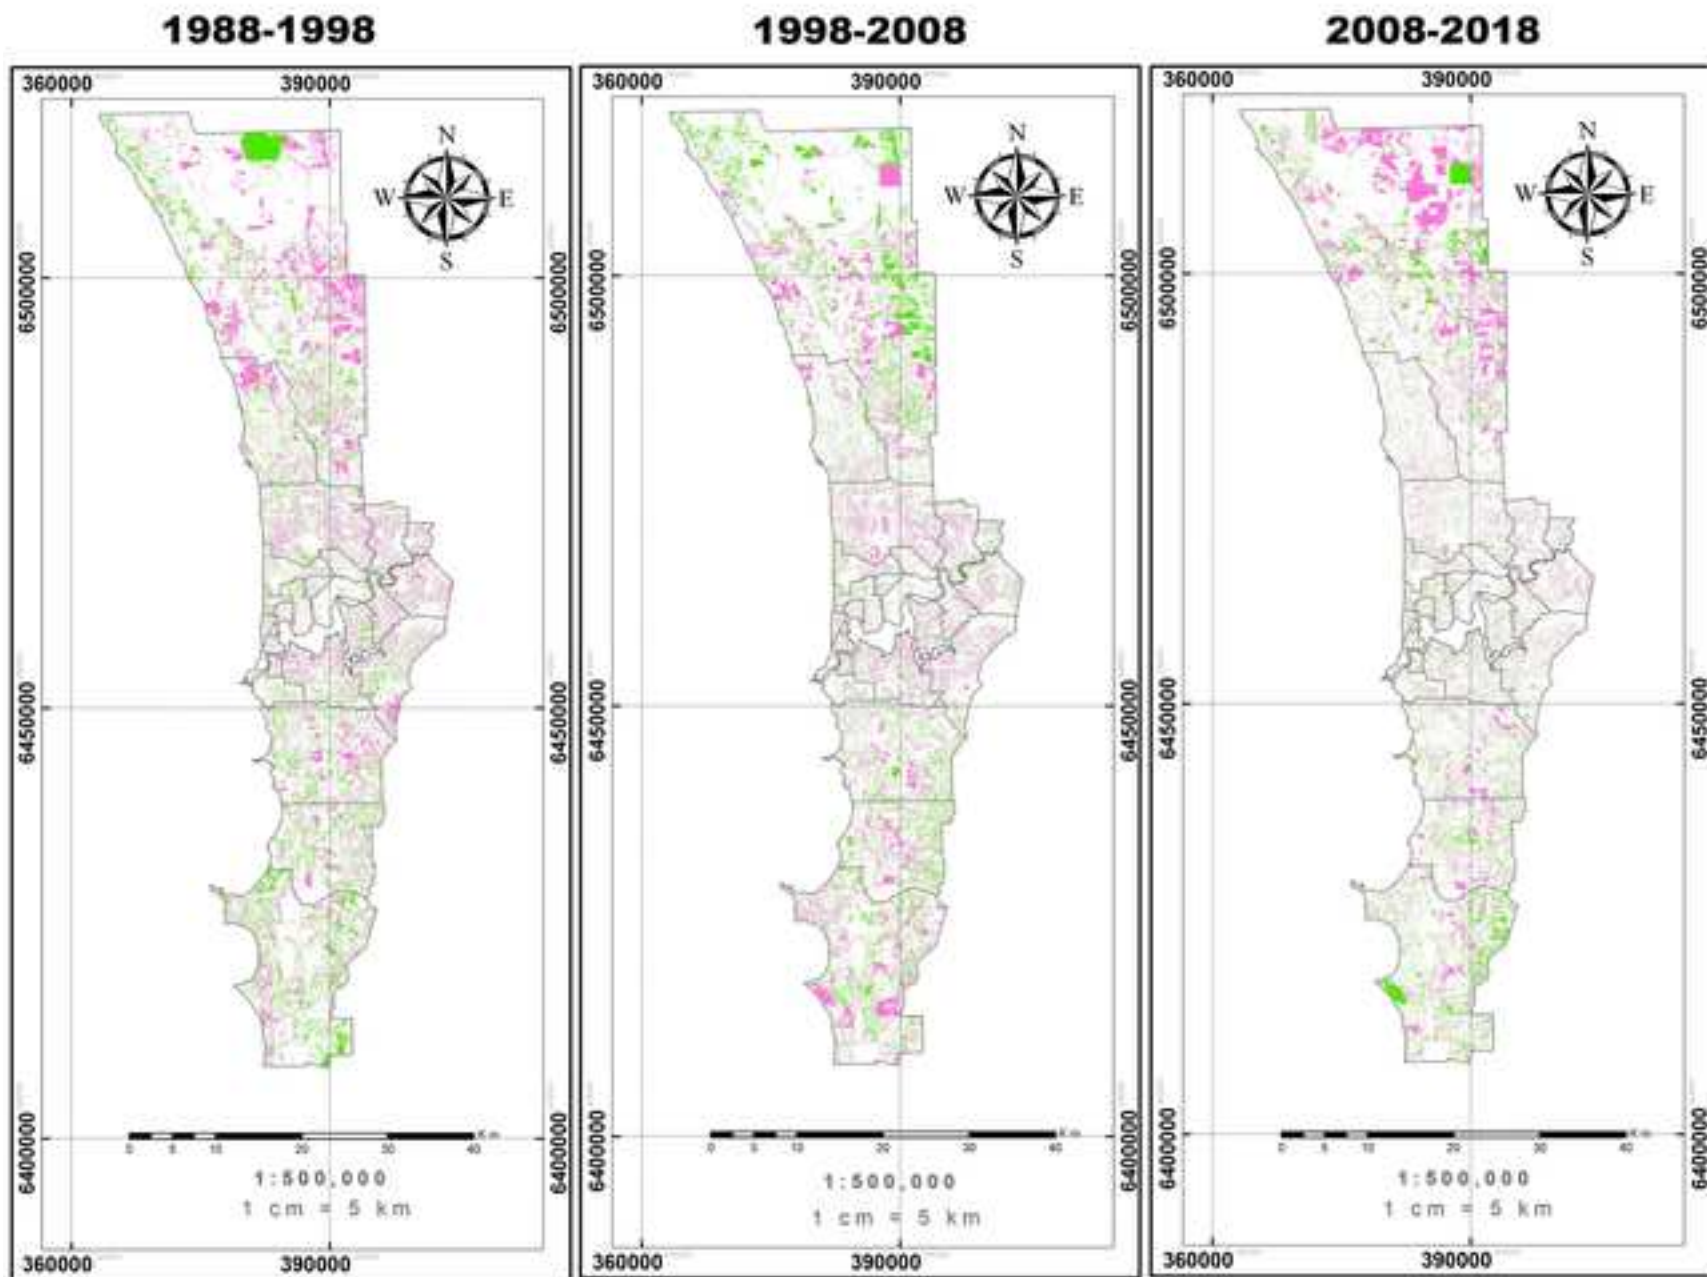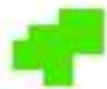

vegetation gain

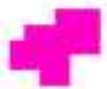

vegetation loss

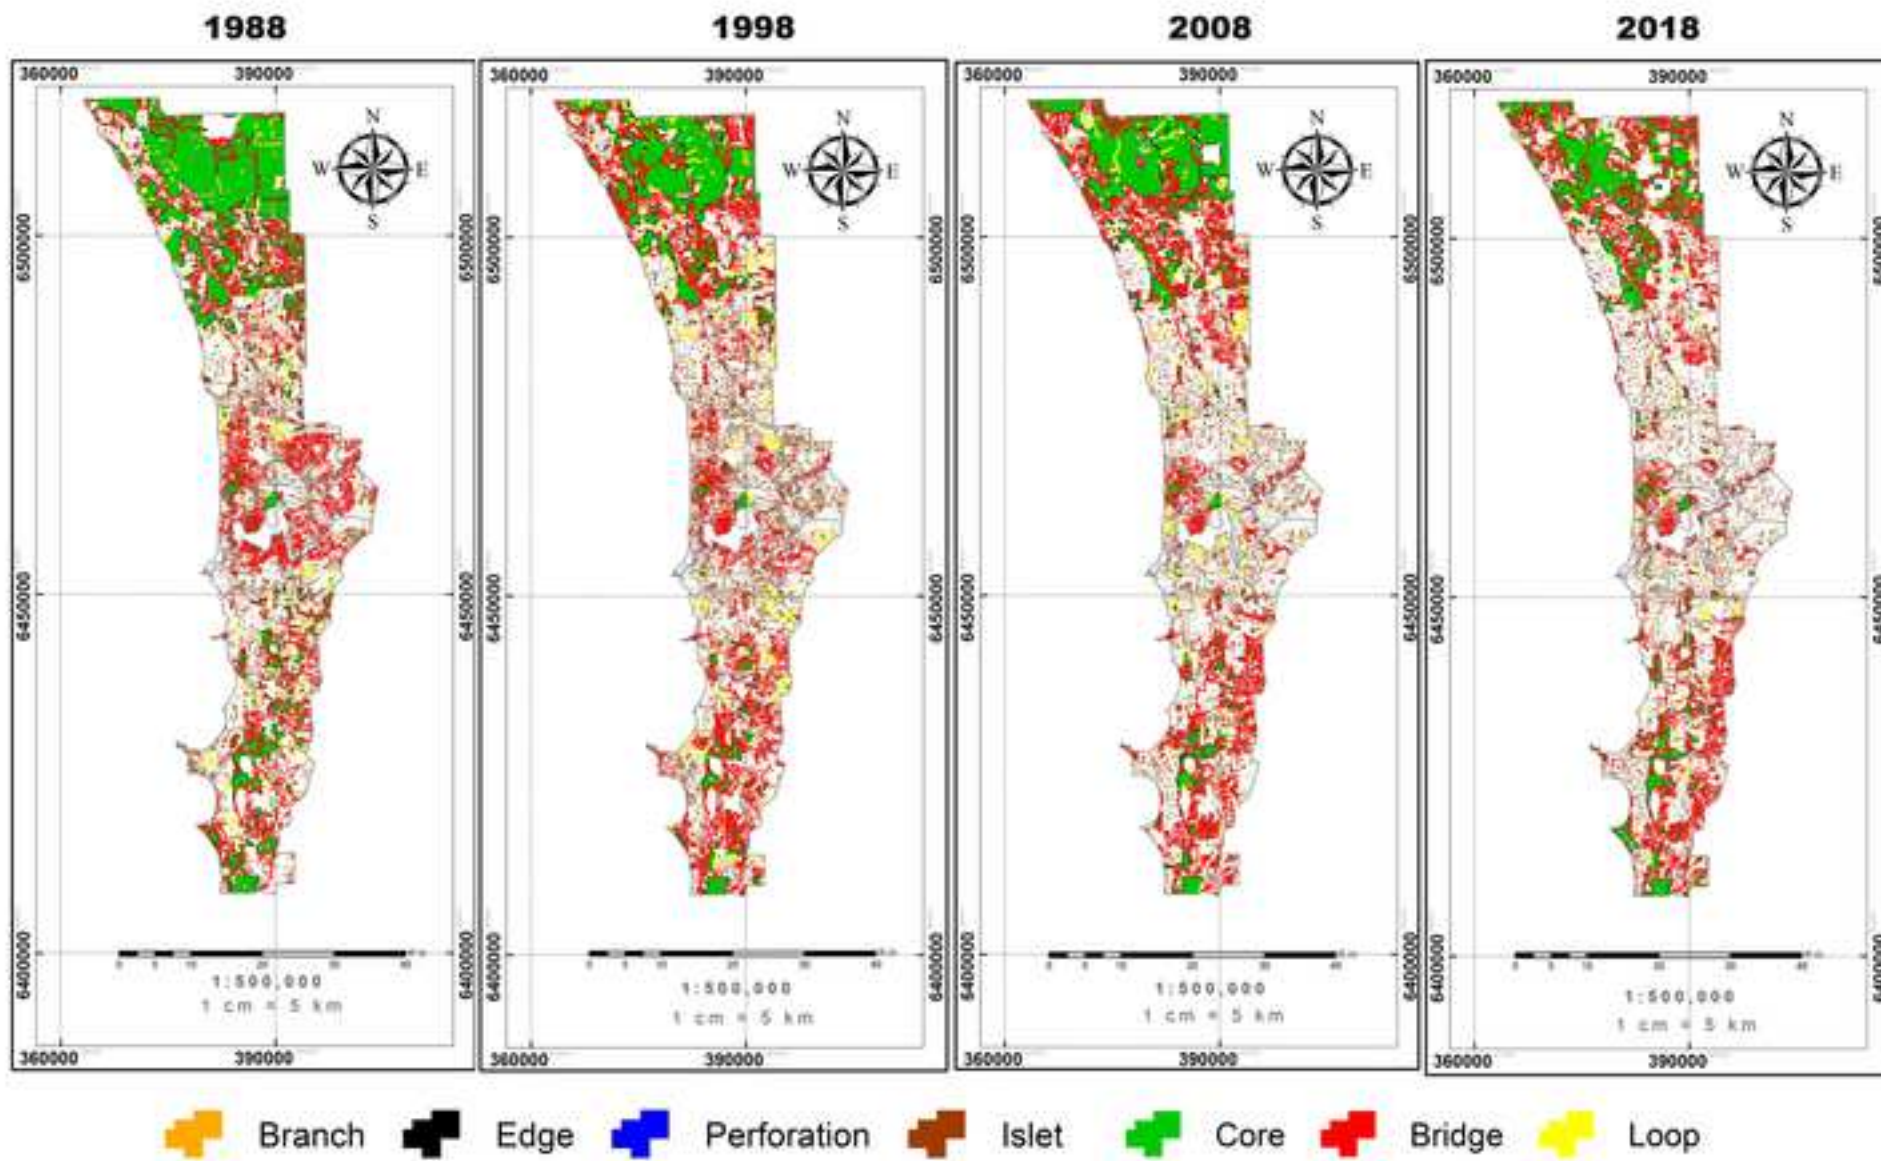

1 Vegetation trends associated with urban development: ~~The~~ role of golf  
 2 courses~~Trends in vegetation dynamics associated with urban development:~~  
 3 The role of golf courses

4  
 5  
 6 Thu Thi Nguyen<sup>1,3\*</sup>, Paul Barber<sup>2,3</sup>, Richard Harper<sup>3</sup>, Tran Vu Khanh Linh<sup>4</sup>, Bernard Dell<sup>3</sup>

7  
 8 <sup>1</sup> Vietnam National University of Forestry (VNUF), Xuan Mai, Chuong My, Ha Noi, Vietnam,

9 <sup>2</sup> ArborCarbon Pty Ltd, 1 City Farm Place, East Perth, WA 6004, Australia

10 <sup>3</sup> Agricultural and Forestry Sciences, Murdoch University, Murdoch, WA 6150, Australia,

11  
 12 <sup>4</sup> Faculty of Forestry, Nong Lam University - Ho Chi Minh City, Thu Duc District, Ho Chi Minh City, Vietnam-

13  
 14  
 15  
 16  
 17 \*Corresponding author

18  
 19 -Emails: [Thu.Nguyen@murdoch.edu.au](mailto:Thu.Nguyen@murdoch.edu.au); [thu.nguyen.2k14@gmail.com](mailto:thu.nguyen.2k14@gmail.com)

20  
 21  
 22  
 23 **Abstract**

24 Globally, cities ~~have~~are growing rapidly in size and density and this has caused profound impacts on  
 25 urban forest ecosystems. Urbanization requiring ~~clearing~~deforestation of vegetation-reduces  
 26 ecosystem services that benefit both city dwellers and biodiversity. Understanding spatial and  
 27 temporal patterns of vegetation changes associated with urbanization is ~~thus a~~ vital ~~for~~component of  
 28 future sustainable urban development. We used Landsat time series data for ~~the~~three decades from  
 29 ~~period~~ 1988 to 2018 to characterize changes in vegetation cover and habitat connectivity in the Perth  
 30 Metropolitan Area, in a rapidly urbanising Australian biodiversity hotspot, as a case study to  
 31 understand the impacts of urbanization on urban forests. Moreover, as golf courses are ~~rapidly~~  
 32 ~~increasing~~a major component in ~~many~~ urban areas, we assessed the role of golf courses in maintaining  
 33 vegetation cover and creating habitat connectivity. ~~We~~To do this we employed (1) land use  
 34 classification ~~with~~ post-classification change detection, and (2) Morphological Spatial Pattern  
 35 Analysis (MSPA). Over 17,000 ~~hectares~~ha of vegetation were cleared and the area of vegetation

**Style Definition:** Normal: Font: Times, Line spacing: Double

**Style Definition:** Heading 1: Font: Bold, Font color: Text 1, Outline numbered + Level: 1 + Numbering Style: 1, 2, 3, ... + Start at: 1 + Alignment: Left + Aligned at: 0" + Indent at: 0.3"

**Style Definition:** Heading 2: Font: Bold, Italic, Outline numbered + Level: 2 + Numbering Style: 1, 2, 3, ... + Start at: 1 + Alignment: Left + Aligned at: 0" + Indent at: 0.4"

**Style Definition:** Heading 3: Font: 12 pt, Not Bold,

**Formatted:** Font: 14 pt, Bold

**Formatted:** Font: 14 pt

**Formatted:** Font: 14 pt, Bold

**Formatted:** Font: Times, 14 pt

**Formatted:** Font: 11 pt

**Formatted:** Font: Times, 11 pt, Not Bold

**Formatted:** Font: +Body (Calibri), 11 pt

**Formatted:** Font: Times, 11 pt, Not Bold

**Formatted:** Font: (Default) Times, 11 pt, Not Bold, Font color: Auto, Superscript

**Formatted:** Font: (Default) Times, 11 pt, Font color: Auto

**Formatted:** Font: (Default) Times, 11 pt, Not Bold, Font color: Auto, Superscript

**Formatted:** Font: (Default) Times, 11 pt, Font color: Auto

**Formatted:** Font: (Default) Times, 11 pt, Font color: Auto, Superscript

**Formatted:** Font: (Default) Times, 11 pt, Font color: Auto

**Formatted:** Font: (Default) Times, 11 pt, Not Bold, Font color: Auto, Superscript

**Formatted:** Font: (Default) Times, 11 pt, Font color: Auto

**Formatted:** Justified

**Formatted:** Font: Times, 11 pt

**Formatted:** Font: Times, 11 pt

**Field Code Changed**

**Formatted:** Font: Times, 11 pt

**Formatted:** Font: (Default) Times, 12 pt, Font color: Auto

**Formatted:** Normal

**Formatted:** Font: (Default) Times, 12 pt

**Formatted**

36 contributing to biodiversity connectivity was reduced significantly over the three decades. The spatial  
37 patterns of vegetation loss and gain were different in each of ~~last the three decades (-1988-2018), the~~  
38 ~~three decades~~ reflecting the implementation of urban planning. Furthermore, MSPA analysis showed  
39 that the reduction in vegetation cover led to habitat fragmentation with a significant decrease in the  
40 core and bridge classes and an increase in isolated patches in the urban landscape. Golf courses played  
41 a useful role in maintaining vegetation cover and contributing to connectivity in a regional biodiversity  
42 hotspot. Our findings suggest that for future urban expansion, urban planning needs to more carefully  
43 consider ~~land clearing and its~~ impacts of deforestation on connectivity in the landscape. Moreover,  
44 there is a need to take into consideration opportunities for off-reserve conservation in smaller habitat  
45 fragments such as in golf courses in sustainable urban management.

**Formatted:** Font: (Default) Times, 11 pt, Font color: Auto, English (Australia)

**Formatted:** Font: (Default) Times, 11 pt, Font color: Auto, English (Australia)

**Formatted:** Font: (Default) Times, 11 pt, Font color: Auto, English (Australia)

**Formatted:** Font: (Default) Times, 11 pt

**Formatted:** Not Highlight

**Formatted:** Font: (Default) Times, 11 pt

**Formatted:** Not Highlight

**Formatted:** Font: (Default) Times, 11 pt

## 46 1 Introduction

**Formatted:** Font: (Default) Times, 12 pt, Not Bold, Not Italic

48 Introduction

49 Globally, cities have grown rapidly in number and size over recent decades [1, 2]. This trend is

50 predicted to continue as urban areas are expected to absorb most ~~of the~~ global population growth [3].

51 While the process of urbanization presents key implications for changes in physical landscapes and

52 demographic characteristics, it can cause profound impacts on environmental components, especially

53 on urban forest ecosystems [4, 5].

54 Vegetation in urban landscapes is critically important because ~~it can provide~~s goods and services, and

55 full ecosystem functions that benefit city dwellers and the environment. On the one hand, a remarkable

56 range of human well-being benefits are ~~derived~~delivered from urban green spaces including mitigating

57 the urban heat island (UHI) effect which is a threat to human health [6, 7]; reducing stress [8], ~~risk of~~

58 ~~poor mental health~~ [9] and ~~mortality from cardiovascular disease~~ [10]; and improving healing times

59 [11], increasing self-esteem and empowerment [12], and improving cognitive ability [13]. On the other

60 hand, urban green spaces provide various ecosystem services such as strengthening resistance to some

61 ~~kinds of natural disasters; for example, floods~~ natural disasters [14], promoting biological processes

62 such as pollination [15], and reducing surface erosion from stormwater runoff [16]. The amount of

63 vegetation in cities strongly influences biodiversity, especially where vegetation is set aside during the

64 process of urbanization [17]. However, if species dispersal and exchange among these patches is

65 insufficient to allow gene flow and diversity, loss of regional biodiversity is inevitable [18]. Therefore,

66 urban development that requires ~~clearing of vegetation~~deforestation, due to causes reduction in

67 vegetation cover, with habitat loss and fragmentation ~~is, and hence may be considered~~ a threat to

68 biodiversity [17, 19].

69 Urban conservation strategies must therefore consider not only the size and quality of habitat reserves,

70 but the connectivity in the intervening urban vegetation matrix [19]. While the need to protect large

71 habitat reserves is obvious, opportunities for off-reserve conservation of smaller habitat fragments

72 should not be overlooked [20]. Understanding spatial and temporal patterns of vegetation change

73 associated with urbanization, as well as opportunities for the preservation of green spaces outside

- Formatted: Font: (Default) Times, 12 pt, Not Bold
- Formatted: Font: (Default) Times, 12 pt, Font color: Text 1
- Formatted: Check spelling and grammar
- Formatted: Left, Space Before: 0 pt, After: 0 pt, Line spacing: single
- Field Code Changed
- Formatted: Font: 11 pt
- Formatted: Default Paragraph Font, Font: 11 pt
- Field Code Changed
- Formatted: Font: 11 pt
- Formatted: Default Paragraph Font, Font: 11 pt
- Formatted: Check spelling and grammar
- Formatted: Font: (Default) Times, 11 pt, Font color: Auto, English (Australia)
- Field Code Changed
- Formatted: Font: 11 pt
- Formatted: Default Paragraph Font, Font: 11 pt
- Formatted: Check spelling and grammar
- Formatted: Not Expanded by / Condensed by , Pattern: Clear
- Formatted: Font color: Auto, Pattern: Clear
- Formatted: Font color: Auto, Pattern: Clear



74 natural reserves, is vital for future sustainable urban development especially in areas of global  
75 ecological importance.

76 ~~As the number of golf courses is rapidly increasing in many urban areas worldwide [21], there have~~  
77 ~~been many environmental arguments about this green space category in urban landscapes. Golf~~  
78 ~~courses are sometime considered to be major polluters of the environment through pesticide and~~  
79 ~~fertilizer use [22]. However, golf courses in urban settings create large green area habitats, which even~~  
80 ~~surpass many nature reserves in size [23]. In fact, golf courses have been established for recreational~~  
81 ~~purposes, which are a mix of bushland, fairways and infrastructure. Though they are not fully~~  
82 ~~ecologically functional as with a natural parks, previous studies investigated the condition of~~  
83 ~~vegetation inside the golf courses and indicated that the bushland in non-playing areas of golf courses~~  
84 ~~are significantly important to biodiversity conservation and the provision of ecosystem services in~~  
85 ~~cities [24], such as providing refuge habitats for urban-avoiding wildlife [23, 25, 26]. Therefore,~~  
86 ~~potentially, together with the natural reserves, golf courses can play some roles as off-reserve sites for~~  
87 ~~purposeful biodiversity conservation in urban landscapes. Potentially, urban golf courses could~~  
88 ~~become more purposeful areas for biodiversity conservation and the provision of ecosystem services~~  
89 ~~in cities [24]. Previous studies have identified some of the biological values of golf courses, such as~~  
90 ~~providing refuge habitats for urban-avoiding wildlife [23, 25, 26]. Nevertheless, little research has~~  
91 ~~been undertaken to comprehensively assess the role of golf courses in maintaining vegetation patches~~  
92 ~~as interconnected nodes in urban landscapes during a long period of urban development where~~  
93 ~~vegetation clearing/deforestation was significant.~~

94 ~~Vegetation clearing/Deforestation~~ for urban expansion can occur gradually over multiple years.  
95 Satellite-based remote sensing holds certain advantages in the characterization of these changes in  
96 urban landscapes because of the large spatial coverage, high time resolution, and wide availability of  
97 data [27]. ~~For example, medium resolution Landsat images of medium resolution allow for mapping~~  
98 ~~of large~~ urban areas ~~at a large spatial scale~~ [28]. Many methods have been used to detect, monitor and  
99 quantify vegetation changes, but differences in vegetation index and land use classification are the  
100 most widely used methods for vegetation change over a long period of time [28].

Formatted: Font: (Default) Times New Roman

Formatted: Left, Space Before: 0 pt, After: 0 pt, Line spacing: single

Formatted: Font: (Default) Times New Roman

Formatted: Font: (Default) Times New Roman

Formatted: Font: Times New Roman

Formatted: Font: Times New Roman

Formatted: Font: (Default) Times New Roman

Formatted: Font: (Default) Times, 11 pt, Font color: Auto

Formatted: Font: (Default) Times, 11 pt, Font color: Auto

Formatted: Font: (Default) Times, 11 pt, Font color: Auto

Formatted: Font: (Default) Times, 11 pt, Font color: Auto

Formatted: Font: (Default) + Body (Calibri)

101 A great number of vegetation indices have been proposed, ranging from very simple to very complex  
102 band combinations [29]. The most widely-used vegetation index is the Normalized Difference  
103 Vegetation Index (NDVI), which is the most efficient and simple metric to identify vegetated  
104 areas and their condition [30]. ~~which~~ This separates green vegetation from other surfaces based on the  
105 ability of chlorophyll to absorb red light for photosynthesis and reflect the near-infrared (NIR)  
106 wavelengths [31]. Furthermore, information on vegetation cover dynamics can be combined with  
107 Morphological Spatial Pattern Analysis (MSPA) to describe the spatial configuration of the ecosystem  
108 at the pixel level, making it possible to detect temporal changes in the structural connectivity of  
109 habitats in urban settings [32].

**Formatted:** Font: (Default) Times, 11 pt, No underline, Font color: Auto, Not Highlight

**Formatted:** Left, Space Before: 0 pt, After: 0 pt, Line spacing: single, Adjust space between Latin and Asian text, Adjust space between Asian text and numbers

**Formatted:** Font: (Default) Times, 11 pt, Not Highlight

**Formatted:** Font: 11 pt, English (Australia)

**Formatted:** Font: 11 pt, English (Australia)

110 Therefore, to enhance the understanding of vegetation dynamics associated with urbanization and the  
111 role of golf courses in maintaining urban forests, we used Landsat imagery to map vegetation cover  
112 and to assess its spatial and temporal distribution over three decades from 1988 to 2018. ~~Then, m~~ Maps  
113 of vegetation cover were used for MSPA analysis to detect changes in habitat connectivity. We chose  
114 the Perth Metropolitan area for the study as it lies within a rapidly urbanizing biodiversity hotspot in  
115 Australia. The three primary research objectives were to: (1) determine the spatial and temporal  
116 patterns of ~~vegetation clearing~~ deforestation in urbanization; (2) evaluate the spatial and temporal  
117 patterns of green landscape connectivity; and (3) assess the ~~impact~~ role of golf courses ~~on~~ in  
118 preserving green spaces and biodiversity in an urban landscape. This analysis will provide a useful  
119 perspective on the land-use pressure facing vegetation remnants ~~in-in this the~~ region ~~and their~~  
120 connectivity in the Southwest Australia Ecoregion (SWAE) which is recognised as one of 35  
121 international biodiversity hotspots, ~~and is home to with~~ over 1500 plant species with a high degree of  
122 endemism [33], and provide a framework for planning urban expansions both in this region and  
123 globally.

**Formatted:** Default Paragraph Font, Font: 11 pt

**Formatted:** Font: Not Bold

## 124 2 Methods

**Formatted:** Line spacing: single

### 125 2.1 Study area

**Formatted:** Heading 2, Space Before: 0 pt, After: 0 pt, Line spacing: single

126 The study area belongs to the Perth Metropolitan ~~area~~ region covering four sub-regions (North West,  
127 Middle Central, Inner Central and South West). Perth has a Mediterranean-type temperate climate

**Formatted:** Left, Line spacing: single

128 with a hot and dry summer, and a cold and rainy season ~~occurring~~ occurring between May and October  
129 [34]. West (Fig 1). Under future climate-change scenarios, this area is projected to experience a  
130 lower annual rainfall in the future [35].

Formatted: English (Australia)

Formatted: English (Australia)

131 Although Perth may be the driest regions on Earth, it is still home to some amazing biodiversity. Perth  
132 belongs to the Australia's southwest corner, which is recognized as a global biodiversity "hotspot"  
133 with outstanding natural environments. Our study area covers occurs on most of the Swan Coastal  
134 Plain. This plain which is connected with the valleys around Perth, the Esperance plains, and  
135 the jarrah karri eucalyptus forests, making part of the southwest of Australia which in turn has the  
136 highest concentration of rare and endangered species on the entire continent (at least 1,500 endemic  
137 species). More than 6,000 species of native plants and 100 native mammals, birds, frogs and reptiles  
138 found occur in this region, making it a biodiversity "hotspot" [33, 36].

Formatted: English (Australia)

139 Perth has retained a significant area of natural vegetation which ~~have~~ has conservation significance  
140 thanks to the introduction of ~~some of~~ legislation, and policies aimed primarily at protecting  
141 biophysical environmental values. ~~Some of these policies are~~ This includes the Western Australian  
142 *Environmental Protection Act*, 1986 [37]; the Federal Government's *Environment Protection and*  
143 *Biodiversity Conservation Act*, 1999 [38]; and more recently, Bush Forever [39, 40], a policy which  
144 took a whole-of-government approach to identify and protect biologically significant bushland and  
145 wetlands within the Perth metropolitan area. However, Perth ~~Perth is located in a globally recognised~~  
146 **biodiversity hot spot** [41] in a region of Mediterranean type climate and has experienced extensive  
147 urban development ~~at an unsustainable rates~~ since the 1980s [42]. The expansive growth of the Perth  
148 metropolitan footprint has contributed to the loss of biodiversity, together with the ecosystem services  
149 provided by natural areas [37-40].

Formatted: English (Australia)

Formatted: Font: +Body (Calibri), English (Australia)

150 Together with urbanization, the golf industry has expanded contributing to a growing proportion of  
151 Perth's urban green space. ~~There are with~~ 34 golf courses in the study area (FigFigure 1).

Formatted: Font: Not Bold

152  
153

154  
155  
156  
157  
158  
159  
160  
161  
162  
163  
164  
165  
166  
167  
168  
169  
170  
171  
172  
173  
174  
175  
176  
177  
178  
179

**Figure 1. Location of the study area (from USGS EROS (Earth Resources Observatory and Science (EROS) Center) in the public domain: <http://eros.usgs.gov/#>)**

## 2.2 Approaches

We conducted two types of analyses in this study: (1) assessment of vegetation cover change in golf courses since 1988 relative to surrounding areas to provide a broad overall context of the urban vegetation changes that have taken place throughout the region and the role of golf courses; and (2) assessment of MSPA. In these analyses, we used four data sets (1988, 1998, 2008, 2018) covering thirty years of urban development. The steps taken in this study are summarized in a flow chart (Figure 2).

### 2.2.1 Landsat data and pre-processing

Three Landsat 5 Thematic Mapper images (WRS path 113 row 82) were acquired from 1988 to 2008 and one Landsat OLI 8 (WRS path 113 row 82) was acquired in 2018 at four time steps, including ~~year 1988 (11<sup>th</sup> December), year 1998 (7<sup>th</sup> December), year 2008 (18<sup>th</sup> December), year 2018 (14<sup>th</sup> December)~~. The Landsat imagery were obtained from the US Geological Survey (USGS) of the Earth Resources Observation and Science Center (EROS)-Earth Resources Observation. Image dates were selected ~~from cloud-free scenes~~ acquired during December (summer, dry season) to reduce the seasonal difference effects (Table 1). All images selected are cloud-free scenes or little cloud cover (0.05% and 0.4%) scenes with the whole study area is cloud-free; Therefore, is no requirement for removing cloud. Georeferencing was performed at the USGS prior to downloading the data (LIT level of systematic geometric accuracy) and no further refinement was undertaken. Atmospheric and topographic corrections were performed on the Landsat data sets. The atmospheric correction was carried out to adjust the multitemporal dataset to a common radiometric scale [43].

**Table 1. Landsat scenes used in the study**

Formatted: Left, Line spacing: single, Tab stops: 1.25", Left

Formatted: Font: +Body (Calibri), Bold

Formatted: Left, Line spacing: single

Formatted: Left: 0.98", Right: 0.98", Header distance from edge: 0.49", Footer distance from edge: 0.49", Different first page header

Formatted: Left, Line spacing: single

Formatted: Font: (Default) Times, 12 pt

Formatted: Font: (Default) Times, 12 pt, Not Bold

Formatted: Heading 2, Space Before: 0 pt, After: 0 pt, Line spacing: single

Formatted: Left, Space Before: 0 pt, After: 0 pt, Line spacing: single, Adjust space between Latin and Asian text, Adjust space between Asian text and numbers

Formatted: Font: 12 pt, Not Bold, Font color: Auto

Formatted: Superscript

Formatted: Superscript

Formatted: Superscript

Formatted: Superscript

Formatted: Font: (Default) Times, 11 pt, English (Australia)

Formatted: Font color: Auto

Formatted: Font color: Auto

Formatted: Font: (Default) Times, Bold

Formatted: Left

Formatted: Font: Bold, Pattern: Clear

Formatted: Font: (Default) +Body (Calibri), 11 pt, Bold

180

| Type of imagery | Year | Day/month | Cloud Cover | Resolution (m) |
|-----------------|------|-----------|-------------|----------------|
| Landsat 5 TM    | 1988 |           | 0%          | 30m            |
|                 | 1998 |           | 0%          | 30m            |
|                 | 2008 |           | 0%          | 30m            |
| Landsat 8 OLI   | 2018 |           | 0%          | 30m            |

- Formatted: Font: Bold
- Formatted: Don't adjust space between Latin and Asian text, Don't adjust space between Asian text and numbers
- Commented [RH1]: Add data in this column
- Formatted Table

181

182 The first process of atmospheric correction was conversion of the digital number (DN) remote sensing  
 183 data values to at-sensor radiance based on the image header file. After that we employed the image-  
 184 based models - dark object subtraction (DOS) to correct atmospheric scattering scene-by-scene. [This  
 185 method is a widely used and effective method in atmospheric correction](#) [44-50]. Topographic  
 186 correction was conducted to remove ~~the~~ topographic effects. We used [a sun-canopy-sensor \(SCS\)](#)  
 187 correction based on the 30 m [digital elevation model \(DEM\)](#) because topographic shading is not only  
 188 due to slope but also to shadowing of one tree crown over another and this is one of the most widely  
 189 and effective used methods of topographic correction [51].

- Formatted: Left, Space Before: 0 pt, After: 0 pt, Line spacing: single, Adjust space between Latin and Asian text, Adjust space between Asian text and numbers

- Formatted: Pattern: Clear

- Formatted: Font: 11 pt

190

191 **Figure 2.**

192 Flow

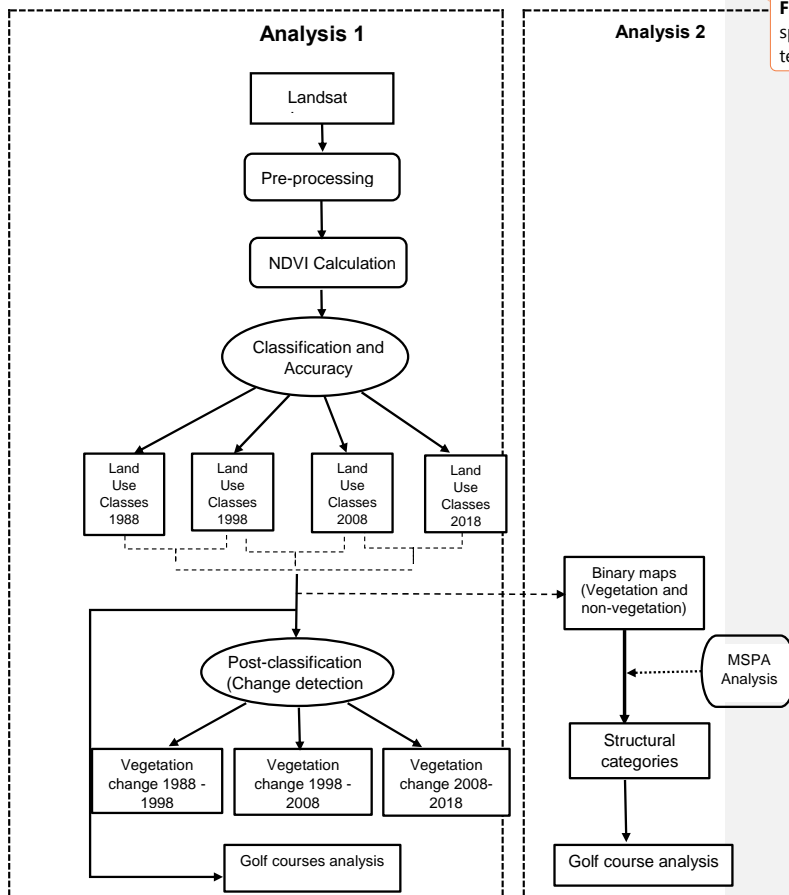

Formatted: Left

Formatted: Font: 11 pt, Bold

Formatted: Left, Space Before: 0 pt, After: 0 pt, Line spacing: single, Adjust space between Latin and Asian text, Adjust space between Asian text and numbers

193

chartPipelines, Flow chart summarizing the major steps taken during the investigation.

Formatted: Font: (Default) Times, Bold, Font color: Auto, English (Australia), Pattern: Clear

Formatted: Font: Bold

Formatted: Font: +Body (Calibri), Bold

194 *(NDVI: Normalized Difference Vegetation Index; MSPA: Morphological Spatial*  
195 *Pattern Analysis)*  
196 **2.2.2 Classification**

197 In a preliminary step, we used a decor relation stretch to enhance the image for more effective  
198 visualization. Prior to image classification, NDVI images were generated. A classification technique  
199 was then applied to the NDVI images of 1988, 1998, 2008 and 2018 using Arc-GIS 10.3 software.

200 NDVI images were obtained by calculating the ratio between the red (R) and near infrared (NIR)  
201 values the visible (VIS) and near infrared (NIR) bands of the satellite image by using Equation 1:

$$NDVI = \frac{(NIR - VISR)}{(NIR + VISR)} \quad (1)$$

203 In Landsat 4-7, NDVI = (Band 4 - Band 3) / (Band 4 + Band 3).

204 In Landsat 8, NDVI = (Band 5 - Band 4) / (Band 5 + Band 4).

205 Landsat TM data of from different dates were independently classified based on the NDVI values. The  
206 Water bodies have negative NDVI values, whereas, bare soil and built-up areas have an NDVI value  
207 of around zero. Chlorophyll in Green vegetation, on the other hand, has consumed RED to drive  
208 photosynthesis stronger near infrared reflectance thereby providing moderate and high NDVI values  
209 close to +1 [52]. Based on this information understanding, the four NDVI images were classified into  
210 three classes (Vegetation, Built up and, bare soil, Water bodies) by using the NDVI threshold  
211 ranges technique in Arc-GIS 10.3 software.

212 The classification based on NDVI threshold was evaluated using accuracy assessment. An error matrix  
213 compared information from a classified image or land cover map to known reference (truth) sites for a  
214 number of sample points assessed in 2018. We obtained photographs of representative land use  
215 categories with GPS locations to assist us in our image interpretations. Also, we used Google Earth  
216 images, true and false colour combination images and knowledge-based information including expert  
217 knowledge, land use maps and reports. For historical images, Google Earth was used to substitute the  
218 traditional reference data collection on each of the sites [53]. Based on data of accuracy assessment,  
219 we reclassified the preliminary land use classification maps to improve the accuracy of classification.

Formatted: Font: Times, 12 pt

Formatted: Heading 3, Left, Space Before: 0 pt, After: 0 pt, Line spacing: single, Adjust space between Latin and Asian text, Adjust space between Asian text and numbers

Formatted: Font: 12 pt, Not Bold

Formatted: Font: (Default) Times, 11 pt, Font color: Auto

Formatted: Font: (Default) Times, 11 pt

Formatted: Font: Times, 11 pt

Formatted: Font: +Body (Calibri), 11 pt

Formatted: Font: (Default) Times, 11 pt, Font color: Auto

Formatted: Space After: 0 pt, Pattern: Clear

Formatted: Left, Space Before: 0 pt, After: 0 pt, Line spacing: single, Adjust space between Latin and Asian text, Adjust space between Asian text and numbers

Formatted: Font: (Default) Times, 11 pt

Formatted: Font: Times

Formatted: Font: Times

Formatted: Font: Times

Formatted: Font: (Default) Times, 11 pt, Font color: Auto, English (Australia)

Formatted: Font: (Default) Times, 11 pt

Formatted: Font: Times

Formatted: Font: (Default) Times, 11 pt

Formatted: Font: (Default) Times, 11 pt, Font color: Auto, English (Australia)

Formatted: Font: Times

Formatted: Font: Times, Font color: Auto

Formatted: Font: Times

### 2.2.3 Vegetation change detection

In order to detect the vegetation cover change, we created binary maps of vegetation and non-vegetation from the classified maps in the previous analysis, one for each adjacent pair of time steps, which depict where degradation occurred within a decade of urbanization. This post-classification analysis uses two images from different dates and classifies them independently. We then calculated changes in vegetation cover type using Equation 2:

$$\text{Change area} = D_2 - D_1 \quad (2)$$

where  $D_1$  and  $D_2$  are the area of the target vegetation cover at the beginning and the end of the study period, respectively. This analysis allows the calculation of vegetation loss and gain in each period.

### 2.2.4 Golf courses Analysis 1

We compared the vegetation cover, and the change detection (vegetation loss and gain) taking place within all golf courses in the study area, and in their surrounding regions. After creating the GIS boundaries of these golf courses, we extracted the vegetation cover and the vegetation change within these boundaries at four time steps in 1988, 1998, 2008 and 2018 to compare vegetation dynamics within the golf courses and the whole study area over time.

### 2.2.5 Morphological Spatial Pattern Analysis (MSPA) ~~MSPA analysis for the structural connectivity of habitats~~

MSPA was employed to describe the structural connectivity of habitats in Perth for four time steps in 1988, 1998, 2008 and 2018. This method describes the spatial and temporal configuration of the ecosystem at the pixel level [32], which was based on the concept of “habitat availability” and “graphic theory” [54, 55] in which the landscape is considered as a collection of nodes, and links with a node is a place where connectivity exists and will depend on the width of itself. The output of the MSPA analysis includes the seven structural categories into which habitats are divided, including core, edge, perforation, bridge, loop, branch and islet [56] and [57] which and are summarized in Table 12. [56] and [57].

Formatted: Font: 12 pt, Not Bold

Formatted: Left, Space Before: 0 pt, After: 0 pt, Line spacing: single

Formatted: Font: 11 pt

Formatted: Left, Space Before: 0 pt, After: 0 pt, Line spacing: single

Formatted: Not Superscript/ Subscript

Formatted: Not Superscript/ Subscript

Formatted: Font: 12 pt, Not Bold

Formatted: Heading 3, Left, Space Before: 0 pt, After: 0 pt, Line spacing: single, Adjust space between Latin and Asian text, Adjust space between Asian text and numbers

Formatted: Font: 12 pt, Not Bold

Formatted: Font color: Auto

Formatted: Font: 11 pt, Not Bold

Formatted: Font: 11 pt, Not Bold

Formatted: Font: Bold

Formatted: Left, Space Before: 0 pt, After: 0 pt, Line spacing: single, Adjust space between Latin and Asian text, Adjust space between Asian text and numbers



246  
247  
248  
249  
250  
251  
252  
253

**Table 121.** Definition of **Morphological Spatial Pattern Analysis (MSPA)** MSPA classes (see [56] and [57]).

| Class       | Description                                                                                                                                                           | Ecological Meaning                                                                                                                                                                                       |
|-------------|-----------------------------------------------------------------------------------------------------------------------------------------------------------------------|----------------------------------------------------------------------------------------------------------------------------------------------------------------------------------------------------------|
| Core        | A collection of foreground pixels which are interconnected. Foreground surrounded by foreground and greater than the user-specified edge width from background.       | Large-scale natural patches with high connectivity.                                                                                                                                                      |
| Edge        | Transition pixels between the foreground and background that form the outer edge. Foreground that separates core from background.                                     | The transition zone between vegetation and non-vegetation areas. The transition zone between green space and non-green space.                                                                            |
| Perforation | The transition pixels between foreground and background inside core areas that form the inner edge. Foreground that separates core from interior areas of background. | Unnatural patch inside the core area.                                                                                                                                                                    |
| Bridge      | A set of linear foreground pixels between two cores that connect two or more core areas. Linearly oriented                                                            | The striped ecological land that connects two cores, which is equivalent to the connecting corridor of the green space network. Striped ecological land between core areas with high connectivity, which |

- Formatted: Font: 11 pt
- Formatted: Font: 11 pt
- Formatted: Font: 11 pt
- Formatted: Font: Bold
- Formatted: Font: 11 pt
- Formatted: Font: 11 pt
- Formatted: Font: +Body (Calibri), 11 pt
- Formatted: Font: 11 pt, Not Bold
- Formatted
- Formatted Table
- Formatted: Font: +Body (Calibri), 11 pt, Not Bold
- Formatted: Font: 11 pt, Not Bold
- Formatted: Font: +Body (Calibri), 11 pt, Not Bold
- Formatted: Font: 11 pt, Not Bold
- Formatted: Font: 11 pt
- Formatted: Font: 11 pt
- Formatted
- Formatted
- Formatted: Font: 11 pt
- Formatted: Font: (Default) +Body (Calibri), 11 pt
- Formatted: Font: +Body (Calibri), 11 pt
- Formatted: Font: 11 pt, Not Bold
- Formatted
- Formatted: Font: 11 pt
- Formatted: Font: 11 pt
- Formatted
- Formatted: Font: +Body (Calibri), 11 pt
- Formatted: Font: (Default) +Body (Calibri), 11 pt
- Formatted: Font: 11 pt, Not Bold
- Formatted
- Formatted: Font: 11 pt
- Formatted: Font: 11 pt
- Formatted: Font: +Body (Calibri), 11 pt
- Formatted: Font: +Body (Calibri), 11 pt
- Formatted: Font: 11 pt, Not Bold
- Formatted
- Formatted: Font: 11 pt
- Formatted: Font: 11 pt
- Formatted

|        |                                                                                                                                                       |                                                                                |
|--------|-------------------------------------------------------------------------------------------------------------------------------------------------------|--------------------------------------------------------------------------------|
|        | <del>foreground that connects two disjunct core areas</del>                                                                                           | <del>is equivalent to the connecting corridor of the green space network</del> |
| Loop   | Linearly oriented foreground pixels that extends from core and connects back to the same core area (e.g. a handle) that connects core area to itself. | Connecting corridor inside a large natural patch.                              |
| Branch | Linearly oriented foreground pixels extended from core that do not connect to any other core area                                                     | Striped ecological land with low connectivity.                                 |
| Islet  | A collection of foreground pixels which is smaller than the core zone and do not connect to any other foreground cells                                | Small natural patches that are isolated and do not connect to each other.      |
| Branch | Linearly oriented foreground that extends from core and terminates in background.                                                                     | Striped ecological land with low connectivity.                                 |

254

255 In order to undertake the MSPA analysis, we defined the input data (foreground class). For this study,

256 we used the classified maps for 1988, 1998, 2008, 2018 in [Analysis 1](#) to create the binary maps

257 which contained vegetation and non-vegetation classes. Hence, the high and full covered vegetation

258 pixels were defined as the foreground pixels (green landscape) in the MSPA approach. The results of

259 MSPA analysis for the four time steps allowed us to assess the changes in habitat connectivity [in the](#)

260 [major urban area of Perth](#) over 30 years of urbanization.

261 **2.2.6 Golf course analysis 2**

262 To assess the role of golf courses in maintaining biodiversity connectivity over 30 years, we compared

263 the habitat connectivity [taking place](#) within all golf courses in the study area and in their surrounding

- Formatted: Font: +Body (Calibri), 11 pt
- Formatted: Font: (Default) +Body (Calibri), 11 pt
- Formatted: Font: 11 pt, Not Bold
- Formatted: Left, Line spacing: 1.5 lines, Adjust space between Latin and Asian text, Adjust space between Asian text and numbers
- Formatted: Font: 11 pt
- Formatted: Font: 11 pt
- Formatted: Line spacing: 1.5 lines, Adjust space between Latin and Asian text, Adjust space between Asian text and numbers
- Formatted: Font: (Default) +Body (Calibri), 11 pt
- Formatted: Font: +Body (Calibri), 11 pt
- Formatted: Font: 11 pt, Not Bold
- Formatted: Left, Line spacing: 1.5 lines, Adjust space between Latin and Asian text, Adjust space between Asian text and numbers
- Formatted: Font: 11 pt
- Formatted: Font: 11 pt
- Formatted: Line spacing: 1.5 lines, Adjust space between Latin and Asian text, Adjust space between Asian text and numbers
- Formatted: Font: (Default) +Body (Calibri), 11 pt
- Formatted: Font: +Body (Calibri), 11 pt
- Formatted: Font: 11 pt, Not Bold
- Formatted: Left, Line spacing: 1.5 lines, Adjust space between Latin and Asian text, Adjust space between Asian text and numbers
- Formatted: Font: 11 pt
- Formatted: Font: 11 pt
- Formatted: Line spacing: 1.5 lines, Adjust space between Latin and Asian text, Adjust space between Asian text and numbers
- Formatted: Font: (Default) +Body (Calibri), 11 pt
- Formatted: Font: +Body (Calibri), 11 pt
- Formatted: Left, Space Before: 0 pt, After: 0 pt, Line spacing: single
- Formatted: Font: Not Bold
- Formatted: Font: 12 pt, Not Bold
- Formatted: Heading 3, Left, Space Before: 0 pt, After: 0 pt, Line spacing: single, Adjust space between Latin and Asian text, Adjust space between Asian text and numbers
- Formatted: Pattern: Clear
- Formatted

264 [green spaces](#) regions. Using the GIS boundaries of the golf courses, we extracted the habitat  
 265 connectivity within the golf course boundaries for four time steps (1988, 1998, 2008 and 2018).

### 266 3 Results

#### 267 3.1 Land use classification in Perth

268 Data sets representing four time periods (1988, 1998, 2008 and 2018) are shown in Figure 3 and Table  
 269 23, which provides an overview of the land [use-cover](#) changes (vegetation, built up and bare land,  
 270 water bodies) over recent decades. From the 1988 and 1998 data sets, it is evident that over half of the  
 271 region was vegetated. However, the urban footprint of built up and bare land area had increased 10%  
 272 from 1998 to 2018. As a consequence, there was a significant decrease in vegetation cover, which  
 273 comprised 56% of the land surface in 1988 and declined by 10.1% over the next 30 years (Table 23).

274 ~~We obtained an~~ ~~The analysis had an overall accuracy (OA) of classification of 87% and a kappa~~  
 275 ~~coefficient of 91% for the three classes.~~

282 **Table 23. Land [cover](#) use classification within the Perth Metropolitan Region.**

|                   |           | Land <a href="#">cover</a> use category |                        |              |             |                        |              |
|-------------------|-----------|-----------------------------------------|------------------------|--------------|-------------|------------------------|--------------|
|                   |           | Whole area                              |                        |              | Golf course |                        |              |
| Land use category | Area (ha) | Vegetation                              | Built up and bare soil | Water bodies | Vegetation  | Built up and bare soil | Water bodies |
| 1988              | Area (ha) | 98,446                                  | 74,376                 | 2,667        | 929         | 210                    | 0.1          |

- Formatted: Font: +Body (Calibri), Pattern: Clear
- Formatted: Font: (Default) Times, 12 pt, Font color: Text 1
- Formatted: Font: (Default) Times, 12 pt
- Formatted: Heading 2, Space Before: 0 pt, After: 0 pt, Line spacing: single
- Formatted: Font: (Default) Times, 12 pt, Not Bold
- Formatted: Left, Space Before: 0 pt, After: 0 pt, Line spacing: single, Adjust space between Latin and Asian text, Adjust space between Asian text and numbers
- Formatted
- Formatted: Font: Not Bold
- Formatted: Font: Not Bold
- Formatted: Font: Bold
- Formatted: Left, Space Before: 0 pt, After: 0 pt, Line spacing: single, Adjust space between Latin and Asian text, Adjust space between Asian text and numbers
- Formatted
- Formatted: Line spacing: Multiple 1.15 li
- Formatted Table
- Formatted: Font: 11 pt
- Formatted: Left, Line spacing: Multiple 1.15 li
- Formatted: Line spacing: Multiple 1.15 li
- Formatted: Font: (Default) +Body (Calibri), 11 pt
- Formatted
- Formatted: Left, Line spacing: Multiple 1.15 li
- Formatted: Font: (Default) +Body (Calibri), 11 pt
- Formatted
- Formatted
- Formatted
- Formatted
- Formatted
- Formatted
- Formatted: Font: 11 pt
- Formatted: Left, Line spacing: Multiple 1.15 li
- Formatted: Font: (Default) +Body (Calibri), 11 pt
- Formatted
- Formatted
- Formatted
- Formatted
- Formatted
- Formatted





291 Using the GIS layer of land use categories, we also extracted the data for three classes within the golf  
292 courses in comparison with the whole area (Table 223). Our analysis shows that while there was a  
293 significant decrease in vegetation cover throughout the region, the total area of golf courses remained  
294 unchanged at around 1.049340 ha over the last 30 years.

Formatted: English (Australia)

295  
296 **Figure 4. Land cover classification showing a detailed view of the Collier Park Golf**  
297 **Course for a) Landsat data; b) NDVI values; c) Land cover classification**  
298 **Figure 4. Land cover changes in the Collier Park Golf Course throughout the time**

Formatted: Font: (Default) Times New Roman, 12 pt, Bold

Formatted: Font: Bold

Formatted: Normal, Left, Space Before: 0 pt, After: 0 pt, Line spacing: single

Formatted: Font: (Default) Times New Roman, 12 pt, Bold

Formatted: Font: (Default) Times New Roman, 12 pt, Bold

300  
301 **3.2 Spatial patterns of vegetation change**

Formatted: Normal, Left, Space Before: 0 pt, After: 0 pt, Line spacing: single

Formatted: Font: (Default) Times, 12 pt

302 To characterize spatial patterns of vegetation dynamics, we detected the vegetation loss and gain for  
303 each of the three decades (Figure 54). In the period 1988 to 1998, vegetation clearing/deforestation  
304 occurred intensively in the central and north regions. From 1998 to 2008, vegetation loss expanded to  
305 the north and south of the city. However, in the last decade from 2008 to 2018, vegetation loss  
306 accelerated in the distal regions with urbanization. However, there was also some vegetation gain over  
307 the three decades (Figure 54, Table 344) predominantly in the northern part of the city.

Formatted: Heading 2, Space Before: 0 pt, After: 0 pt, Line spacing: single

Formatted: Font: (Default) Times, 12 pt, Not Bold

Formatted: English (Australia)

Formatted: Normal, Left, Space Before: 0 pt, After: 0 pt, Line spacing: single

Formatted: English (Australia)

Formatted: English (Australia)

308

309 **Figure 554.**

310 **Change in**  
311 **vegetation**  
312 **cover over**  
313 **the period**  
314 **1988 to 2018**  
315 **for the Perth**  
316 **region three**  
317 **decades.**

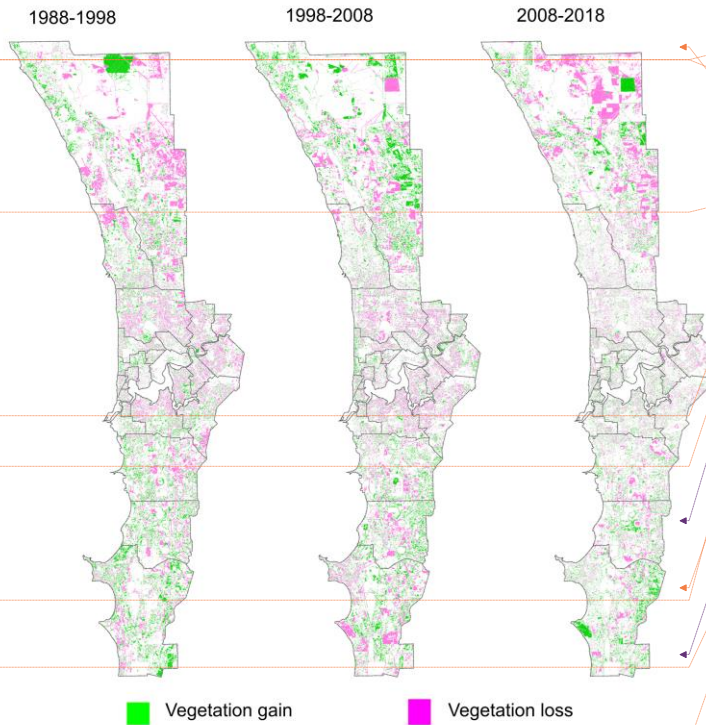

320 **Table 443.**  
321 **Vegetation**  
322 **loss and gain**  
323 **(ha) between**  
324 **1988 and**  
325 **2018 in three**  
326 **time periods**  
327 **over the period 1988 to 2018.**

| Period       |                 | Period    |           |           |
|--------------|-----------------|-----------|-----------|-----------|
|              |                 | 1988-1998 | 1998-2008 | 2008-2018 |
| Whole Area   | Vegetation loss | 22,231    | 19,250    | 20,178    |
|              | Vegetation gain | 15,538    | 15,838    | 12,591    |
|              | Net loss        | 6,692     | 3,412     | 7,587     |
| Golf courses | Vegetation loss | 68        | 27        | 40        |
|              | Vegetation gain | 219       | 92        | 43        |
|              | Net gain        | 152       | 64        | 4         |

328

329 Calculation of changes within the golf courses and in the whole area (Table 344) showed that the  
330 major urban area of Perth experienced a net loss in vegetation cover. Though vegetation compensation

330

Formatted: Normal, Left, Space Before: 0 pt, After: 0 pt, Line spacing: single

Formatted: Font: Bold, English (Australia)

Formatted: Font: Bold, English (Australia)

Formatted: Normal, Left, Space Before: 0 pt, After: 0 pt, Line spacing: single

Formatted: Font: Bold, English (Australia)

Formatted: Font: Bold, English (Australia)

Formatted: Font: Bold

Formatted: Normal, Left, Space Before: 0 pt, After: 0 pt, Line spacing: single

Formatted: Font: Bold

Formatted: Normal, Left, Space Before: 0 pt, After: 0 pt, Line spacing: single

Formatted: Normal, Left, Space Before: 0 pt, After: 0 pt, Line spacing: single

Formatted: Font: Bold

Formatted: Normal, Left, Space Before: 0 pt, After: 0 pt, Line spacing: single

Formatted: Font: Bold

Formatted: Font: Bold, English (Australia)

Formatted Table

Formatted: Centered

Formatted: Font: (Default) Times, 11 pt, Font color: Auto

Formatted: Left, Line spacing: single

Formatted: Font: (Default) Times, 11 pt, Font color: Auto

Formatted: Left, Space Before: 0 pt, After: 0 pt, Line spacing: single

Formatted: Left, Line spacing: single

Formatted: Left, Line spacing: single

Formatted: Left, Line spacing: single

Formatted: Font: (Default) Times, 11 pt, Font color: Auto

Formatted: Left, Space Before: 0 pt, After: 0 pt, Line spacing: single

Formatted: Left, Line spacing: single

Formatted: Left, Line spacing: single

Formatted: Left, Line spacing: single

Formatted: Normal, Left, Space Before: 0 pt, After: 0 pt, Line spacing: single

331 occurred together with ~~vegetation clearing~~deforestation over 30 years of urbanization, the vegetation  
332 loss was always much larger than vegetation gain with the largest net vegetation loss occurring in the  
333 last decade. However, the golf courses showed a different trend where the net gain of vegetation cover  
334 happened over three decades and the largest gain was between 1988 and 1998.

### 335 3.3 Analysis of connectivity components of green space networks

336 Results of the MSPA analysis indicate that the reduction in vegetation cover over the last thirty years  
337 has led to a decline in connectivity (Table 55). Among the two ~~types of landscape~~MSPA classes that  
338 are important for connectivity (core and bridge), the total area of core class decreased by about 10%  
339 over three decades while the bridge class was maintained at around 37,000 ha, but the proportion of  
340 this class per total vegetation cover area (VCA) increased due to the reduction of vegetation cover  
341 over time (Table 455). This analysis also shows the fluctuation in the areas of the rest of the MSPA  
342 classes including islets, loops, edges, perforations, and branches which do not contribute to  
343 connectivity in the landscape. The proportion of these classes increased through time from 24% in  
344 1988 to 30% in 2008 and 2018.

345 Figure 65 shows that the core area was distributed mostly in the northern part of the city and their  
346 areas decreased significantly in later years. In 1988, the bridge class covered a large area of the city's  
347 central region but this decreased over time. In recent years, most of the vegetation cover in the central  
348 region of the city belongs to the islet, loop, edge, perforation and branch classes, illustrating that  
349 isolation became more serious in the central region of the city over the three decades.

### 350 **Figure 65. Results of the Morphological Spatial Pattern Analysis (MSPA) for the Perth** 351 **region MSPA from 1988 to 2018 analysis**

352 The vegetation cover within golf courses also contributes to connectivity. The proportion of core area  
353 within golf courses fluctuated between 12% and 27%. Moreover, the largest proportion of vegetation  
354 in golf courses was classified as bridge but it experienced a downward trend from 52% to 41% in three  
355 decades. Of the remaining classes which do not contribute to connectivity, the edge and loop classes  
356 accounted for a higher proportion with each of them contributing 7% to 16% of total vegetation cover.

Formatted: Font: (Default) Times, 12 pt

Formatted: Heading 2, Space Before: 0 pt, After: 0 pt,  
Line spacing: single

Formatted: Font: (Default) Times, 12 pt, Not Bold

Formatted: Normal, Left, Space Before: 0 pt, After: 0  
pt, Line spacing: single

Formatted: Font: (Default) Times

Formatted: Left, Space Before: 0 pt, After: 0 pt, Line  
spacing: single, Adjust space between Latin and Asian  
text, Adjust space between Asian text and numbers

Formatted: Font: (Default) Times

Formatted: Font: (Default) Times

Formatted: Font: (Default) Times

Formatted: Font: Bold

Formatted: Font: Bold

Formatted: Font: Bold



357  
358  
359  
360  
361  
362  
363  
364

**Formatted:** Font: Not Bold, Font color: Auto  
**Formatted:** Normal, Space Before: 0 pt, After: 0 pt,  
Line spacing: single

**Formatted:** Font: Not Bold, Font color: Auto  
**Formatted:** Normal, Space Before: 0 pt, After: 0 pt,  
Line spacing: Multiple 1.08 li





389 connectivity in the Perth Metropolitan Region. Therefore, our study have worked to filladdresses this  
390 gap.

Formatted: Font: Not Italic

#### 391 4.1 ~~Vegetation clearing~~Deforestation and urbanization

Formatted: Font: (Default) Times, 12 pt

Formatted: Font: (Default) Times, 12 pt, Not Bold

392 The vegetation dynamics in the major urban areas of Perth reflect the pattern of urbanization over  
393 time. The reduction in green space found in this study can be explained as a close relation to the  
394 process of development in this city. Over the last three decades, urban development in Perth has taken  
395 place at an unsustainable rate [42]. In the early 1990s to 2006, Perth's population grew by around  
396 1.8%, but the figure has nearly doubled since then [59]. Also, this study indicated that, from 1988 to  
397 2018, Perth's urban footprint increased from 74,376 thousand to 92 thousand,243 ha (Table 223) and  
398 is consistent with previous research in urban growth in this region [58]. In addition to expansion, the  
399 city has become denser due to the construction of new residential dwellings in urbanised areas. In the  
400 last 20 years, on average, 740 ha/yr of urban and urban deferred zoned land was consumed by  
401 subdivision, and 830 ha/yr was consumed by construction in the Perth metropolitan area and nearby  
402 Peel region [60]. In addition to this expansion, the city has become denser with the construction of  
403 new residential dwellings in urbanised areas. Though vegetation gain occurred in some places as a  
404 result of natural increase in canopy cover as urban vegetation grows through the conservation efforts,  
405 vegetation offset from development projects (e.g. mining), the plantation programs of the government  
406 taking place in bare soils in some suburbs, and efforts to increase green spaces from private land  
407 owners, the vegetation loss associated with urbanization has been more significant.

408 The difference in spatial patterns of vegetation loss are also related to the urban plans of this city. Our  
409 results show that between 1988 and 1998, there was significant vegetation loss in the central region of  
410 the city which can be linked to The Corridor Plan [61]. Historically, Perth's development pattern from  
411 1970s to 1990s was based on linear corridors stretching out from the city's core, with large non-urban  
412 wedges between each of these corridors [61]. However, from 1998 to 2008 and from 2008 to 2018,  
413 ~~vegetation clearing~~deforestation was more significant in the outer subregions of the north-west and  
414 south-west of the city due to the adoption of METROPLAN Metroplan [62]. Perth recently has been  
415 divided into subregional areas, rather than corridors for planning purposes. The two coastal subregions

Formatted: Font: Not Italic

Formatted: Font: Not Italic

416 (the North-West and South-West) included in our study have consistently achieved higher rates of  
417 population growth under Metroplan [63].

418 Originally the region was covered by woodlands dominated by eucalypts and banksias and coastal  
419 heath interspersed with chains of wetlands. Perth is home to a rich biodiversity, with more than 1,700  
420 species of flowering plants and iconic species of threatened fauna in the region [64]. Therefore, such  
421 ~~vegetation clearing~~deforestation for urbanization has resulted in the devastating loss of significant  
422 natural habitats in this biodiversity hotspot city, leading to the designation ~~of as~~ an endangered  
423 ecological community by the Australian Government [41].

#### 424 4.2 *Connectivity of green space networks in urban landscapes*

425 The MSPA analysis indicates that the loss ~~of area~~ of vegetation as a consequence of urban expansion  
426 has led to a marked reduction in connectivity of green space networks in the Perth urban landscape. ~~As~~  
427 ~~the MSPA analysis,~~ ~~As~~ only cores (~~the stepping stones between forest habitat patches~~) and bridges (~~the~~  
428 ~~structural corridors to link core areas~~) can contribute to the connectivity between the habitat areas in  
429 the landscape [65]. ~~The~~ reduction of these ~~areas~~ ~~areas~~ in Perth ~~our study~~ ~~associated with urbanization~~  
430 ~~throughout the time~~ ~~y~~ indicates the high impact of ~~urbanization~~ ~~urban development~~ on habitat  
431 connectivity. ~~through the loss of core areas, which act as stepping stones between forest habitat~~  
432 ~~patches, and the loss of bridges that act as structural corridors to link two or more core areas~~ [65]. This  
433 analysis also shows the increase in proportion of islets, which are totally isolated patches, and other  
434 classes (perforations, loops, branches, edges) that cannot reach a new core habitat area for originating  
435 the potential movement [65]. Clearly, ~~expansion~~ of Perth city has fragmented the remaining blocks of  
436 natural habitat and increased isolation of natural habitats. This may reduce population and gene flow  
437 among patches and may disrupt the connection between subpopulations and a large regional  
438 population [66] ~~and thus threaten the long-term viability of relict populations~~.

439 ~~The~~ ~~fr~~ fragmentation ~~process~~ was obvious in the central region of the city and in recent decades it has  
440 become more serious in the outer parts of the city. This is critical as Perth is within a globally  
441 recognised biodiversity hotspot, which is home to rich biodiversity found nowhere else in the world.  
442 The connectivity in the major urban area of Perth is not only critical for the linkage of habitats within

Formatted: Font: (Default) Times, 12 pt

Formatted: Font: (Default) Times, 12 pt, Not Bold

Formatted: Not Expanded by / Condensed by

Formatted: Not Expanded by / Condensed by

Formatted: Font color: Auto, Not Expanded by /  
Condensed by

443 the Swan Coastal Plain but also for the connection of these coastal habitats to a large regional  
444 biosphere in south-western Australia.

445 The results also illustrated that a ‘Core’ area and a network of ‘Bridge’ types exist in the central and  
446 outer subregions of Perth. This is the consequence of early conservation efforts of the government  
447 which created protected areas such as Kings Park, Bold Park and other significant areas. Very few  
448 cities in the world have such large areas of natural bushland in the centre of a big city [67]. However,  
449 future urban growth will continue to put pressure on the biodiversity. If current policies (Perth and  
450 Peel@3.5million) are fully implemented, existing stocks of urban and urban deferred land would be  
451 consumed by about 2075 [68]. The challenge for urban planning to preserve urban forests and  
452 biodiversity is thus increasing. [and it is clear that planning for future expansion should also include](#)  
453 [large protected areas.](#)-

454 Our MSPA output with spatial distribution of seven classes provides fundamental information for  
455 future urban planning. There is a need to maintain important green spaces which are classified as cores  
456 and bridges in the city, especially in the central region where most of the natural vegetation exists as  
457 islands. Also, the MSPA branch classes can be used to identify candidate ecological restoration areas.  
458 The branch class can be thought of [69] as a foundation of a potential corridor that could, if  
459 revegetated, connect two spatially disjunct core areas to improve connectivity in the larger region.

460 Although other analyses, such as functional connectivity, should be taken into account in landscape  
461 connectivity assessment [32], the structural connectivity analysis in this study will be useful for  
462 determining the priority protection level and critical areas of the connecting corridor, informing  
463 conservation strategies at a variety of scales, especially when the biodiversity values of this region are  
464 suffering from various threats including [land clearing/deforestation](#), feral animals, weed incursions,  
465 more frequent fires through arson and tree disease [64].

### 466 [4.3](#) *The role of golf courses in maintaining urban forest*

467 Our study indicates that golf courses account for a significant proportion of the urban area of Perth.  
468 This category of land use has been vital in maintaining green space in urban areas over the past thirty

Formatted: Left, Space Before: 0 pt, After: 0 pt, Line spacing: single

Formatted: Font: (Default) Times, 12 pt

Formatted: Font: (Default) Times, 12 pt, Not Bold

Formatted: Heading 2, Left, Space Before: 0 pt, After: 0 pt, Line spacing: single, Adjust space between Latin and Asian text, Adjust space between Asian text and numbers

469 years. In contrast to the overall decline in urban green space, golf courses have preserved green spaces  
470 within urban settings and even created a net gain of vegetation cover over time. The highest net gain  
471 was seen in the period between 1988 to 1998 when some golf courses were established resulting in the  
472 planting of trees.

473 In the green ‘matrix’ of Perth, golf courses with their significant area of vegetation cover have  
474 contributed considerably to the connectivity in the urban landscape. A significant proportion of their  
475 green space was classified as core or bridge categories. The proportion of vegetation within golf  
476 courses classified as bridges was higher than in the whole study area. Golf courses with large areas of  
477 native vegetation provide “links” to other large natural patches of urban vegetation.

478 Although there are concerns with the environmentally negative impacts of golf courses as a source of  
479 pollution through pesticide and fertiliser usage [22], habitat modification [25] and high water usage  
480 [70], previous studies provide evidence about the biological values of golf courses, such as providing  
481 refugial habitat for urban-avoiding wildlife [24, 71-79]. Our study indicates that golf courses in urban  
482 settings have been maintaining large green-area habitats and played an important role in biodiversity  
483 connectivity in the city.

#### 484 4.4 Monitoring urban forest dynamics

485 In this study, we utilized medium-resolution satellite remote sensing data to identify land use classes,  
486 characterise vegetation dynamics and connectivity. The data maps the spatial and temporal patterns of  
487 land use types characterizing a consistent, detailed vegetation dynamic of the city [58, 80]. Clearly, the  
488 biophysical elements of urban landscapes are well-reflected through physical features (NDVI) derived  
489 from remote sensing data with an accuracy of up to 89%.

490 Despite these kinds of data, it is hard to describe the detailed information of ecosystem such as species  
491 composition and forest structure. However, they show their advantage in mapping land cover  
492 dynamics across large areas of big cities over time when high resolution imagery is not available. For  
493 monitoring urban forests in big cities, the large scale and long temporal datasets are more  
494 advantageous compared with datasets that focus only on discerning a specific land use type in a

Formatted: Font color: Auto

Formatted: Font: (Default) Times, 12 pt

Formatted: Font: (Default) Times, 12 pt, Not Bold

495 relatively small area [27, 81, 82]. This is because it allows spatially detailed identification of changes  
496 associated with development over time. Therefore, ~~this is the approach described in this paper method~~  
497 provides baseline information for sustainable urban planning and development. In addition, the MSPA  
498 analysis can further evaluate the dynamic of vegetation cover by the describing the spatial  
499 configuration of ecosystems at the pixel level, detecting changes of habitat connectivity over time  
500 [32].

## 501 **5 Conclusions**

502 With rapid urban expansion, the most meaningful question to address is how to balance urban  
503 development and urban forest preservation. Urbanization requiring ~~vegetation clearing~~~~deforestation~~ is  
504 inevitable in many cities worldwide. Our study found a significant loss of vegetation cover in a  
505 biodiversity hotspot over three decades of urbanization, which led to a reduction in habitat  
506 connectivity in the urban landscape. A lesson learned from the experience of urbanization in Perth is  
507 that any future urban growth following the patterns observed over the past three decades will continue  
508 to put pressure on maintaining urban forest ecosystems and biodiversity conservation. As cities  
509 continue to grow in response to socio-economic development, considering all opportunities for urban  
510 biodiversity conservation is important. Urban conservation strategies must therefore consider not only  
511 the protected areas, but also the off-reserve sites.

512 Our study indicates that golf courses in urban settings have been maintaining green-area habitats and  
513 have played an important role in biodiversity connectivity in the city. Potentially, urban golf courses  
514 could become more purposefully managed for biodiversity conservation and the improvement of  
515 critical ecosystem services in urban areas. In ~~the~~ rapidly urbanizing biodiversity hotspots like Perth,  
516 where fragmentation is one the biggest threats to biodiversity, the way that golf courses contribute to  
517 increase the connectivity in the intervening urban matrix should not be underestimated. Therefore, it is  
518 important for government authorities and golf courses owners to pay more attention in maintaining  
519 ecosystem health in urban golf courses.

520

Formatted: Font: (Default) Times, 12 pt, Font color: Text 1

Formatted: Left, Space Before: 0 pt, After: 0 pt, Line spacing: single, Adjust space between Latin and Asian text, Adjust space between Asian text and numbers

Formatted: Space After: 0 pt, Pattern: Clear



521 **6 Acknowledgments**

522 The authors thank Dr. Harry Eslick for his valuable advice in helping to design the research and Mr.  
523 Pham Dang Manh Hong Luan for his advice in data analysis. The research was supported by the  
524 Vietnamese Ministry of Education and Training and Murdoch University through a VIED-MU joint  
525 PhD scholarship to the first author.

526 **7 References**

- 527 1. Tabea TaE, Knop. A landscape ecology approach identifies important drivers of urban  
528 biodiversity. *Global Change Biol.* 2015;21 (4):1652-67.
- 529 2. Bagan H, Yamagata Y. Land-cover change analysis in 50 global cities by using a combination  
530 of Landsat data and analysis of grid cells. *Environmental Research Letters.* 2014;9(6):064015. doi:  
531 10.1088/1748-9326/9/6/064015.
- 532 3. UNDESA UNDoEaSA. World urbanization prospects: The 2011 revision. United Nations  
533 Department of Economic and Social Affairs/Population Division, New York: 2012.
- 534 4. McGrane SJ. Impacts of urbanisation on hydrological and water quality dynamics, and urban  
535 water management: a review. *Hydrological Sciences Journal.* 2016;61(13):2295-311. doi:  
536 10.1080/02626667.2015.1128084.
- 537 5. Gaston KJ, Ávila-Jiménez ML, Edmondson JL. REVIEW: Managing urban ecosystems for goods  
538 and services. *Journal of Applied Ecology.* 2013;50(4):830-40. doi: 10.1111/1365-2664.12087.
- 539 6. Declet-Barreto J, Brazel AJ, Martin CA, Chow WTL, Harlan SL. Creating the park cool island in  
540 an inner-city neighborhood: heat mitigation strategy for Phoenix, AZ. *Urban Ecosystems.*  
541 2013;16(3):617-35. doi: 10.1007/s11252-012-0278-8.
- 542 7. Scott AA, Misiani H, Okoth J, Jordan A, Gohlke J, Ouma G, et al. Temperature and heat in  
543 informal settlements in Nairobi. *PLOS ONE.* 2017;12(11):e0187300. doi:  
544 10.1371/journal.pone.0187300.
- 545 8. Van Den Berg AE, Custers MHG. Gardening promotes neuroendocrine and affective  
546 restoration from stress. *Journal of Health Psychology.* 2010;16(1):1359-053.
- 547 9. Mitchell R. Is physical activity in natural environments better for mental health than physical  
548 activity in other environments? *Social Science & Medicine.* 2013;91(Supplement C):130-4. doi:  
549 <https://doi.org/10.1016/j.socscimed.2012.04.012>.
- 550 10. Donovan GH, Butry DT, Michael YL, Prestemon JP, Liebhold AM, Gatzliolis D, et al. The  
551 relationship between trees and human health: Evidence from the spread of the emerald ash borer.  
552 *American Journal of Preventive Medicine.* 2013;44(2):139-45. doi:  
553 <https://doi.org/10.1016/j.amepre.2012.09.066>.
- 554 11. Ulrich RS. View through a window may influence recovery from surgery. *Science.*  
555 1984;224(4647):420.
- 556 12. Cecily Jane M. Promoting children's mental, emotional and social health through contact  
557 with nature: a model. *Health Education.* 2009;109(6):522-43. doi: 10.1108/09654280911001185.
- 558 13. Lee KE, Williams KJH, Sargent LD, Williams NSG, Johnson KA. 40-second green roof views  
559 sustain attention: The role of micro-breaks in attention restoration. *Journal of Environmental*  
560 *Psychology.* 2015;42(Supplement C):182-9. doi: <https://doi.org/10.1016/j.jenvp.2015.04.003>.
- 561 14. Kim G. Assessing Urban Forest Structure, Ecosystem Services, and Economic Benefits on  
562 Vacant Land. *Sustainability.* 2016;8(7):679. PubMed PMID: doi:10.3390/su8070679.
- 563 15. Zitkovic M. Managing green spaces for urban biodiversity. Boulevard Louis Schmidt 64 1040  
564 Brussels, Belgium: Countdown 2010 Secretariat, IUCN Regional Office for Europe, 2008.

**Formatted:** Font: (Default) Times, 12 pt, Font color: Text 1

**Formatted:** Font: (Default) Times, 12 pt, Not Bold, Font color: Text 1

**Formatted:** Left, Line spacing: single, Adjust space between Latin and Asian text, Adjust space between Asian text and numbers

**Formatted:** Font: (Default) Times, 12 pt

**Formatted:** Heading 1, Space Before: 0 pt, After: 0 pt, Line spacing: single, Adjust space between Latin and Asian text, Adjust space between Asian text and numbers

**Formatted:** Font: (Default) Times, 12 pt, English (Australia), Check spelling and grammar

**Formatted:** Font: (Default) Times, 11 pt, English (Australia), Check spelling and grammar

- 565 16. Seitz J, Escobedo F. Urban forests in Florida: Trees control stormwater runoff and improve  
566 water quality. University of Florida, Institute of Food and Agricultural Sciences. IFAS Extension  
567 Publication FOR184.2014.
- 568 17. Bailey D, Schmidt-Entling MH, Eberhart P, Herrmann JD, Hofer G, Kormann U, et al. Effects of  
569 habitat amount and isolation on biodiversity in fragmented traditional orchards. *Journal of Applied  
570 Ecology*. 2010;47(5):1003-13. doi: 10.1111/j.1365-2664.2010.01858.x.
- 571 18. Yu D, Liu Y, Xun B, Shao H. Measuring Landscape Connectivity in a Urban Area for Biological  
572 Conservation. *CLEAN – Soil, Air, Water*. 2015;43(4):605-13. doi: 10.1002/clen.201200448.
- 573 19. Bierwagen B. Connectivity in urbanizing landscapes: The importance of habitat configuration,  
574 urban area size, and dispersal2007. 29-42 p.
- 575 20. Lindenmayer D, Franklin J. Conserving forest biodiversity: a comprehensive multiscaled  
576 approach2002.
- 577 21. Napton DE, Laingen CR. Expansion of Golf Courses in the United States. *Geographical Review*.  
578 2008;98(1):24-41.
- 579 22. Guzmán C, & Fernández, D., Javier Mesa. Environmental impaccts by golf courses and  
580 strategies to minimize them: state of the art. *International Journal of Arts & Sciences*. 2014;7(3):403-  
581 17.
- 582 23. Colding J, Folke C. The Role of Golf Courses in Biodiversity Conservation and Ecosystem  
583 Management. *Ecosystems*. 2009;12(2):191-206. doi: 10.1007/s10021-008-9217-1.
- 584 24. Hodgkison SC, Hero JM, Warnken J. The conservation value of suburban golf courses in a  
585 rapidly urbanising region of Australia. *Landscape and Urban Planning*. 2007;79(3):323-37. doi:  
586 <https://doi.org/10.1016/j.landurbplan.2006.03.009>.
- 587 25. Terman MR. Natural links: naturalistic golf courses as wildlife habitat. *Landscape and Urban  
588 Planning*. 1997;38(3):183-97. doi: [https://doi.org/10.1016/S0169-2046\(97\)00033-9](https://doi.org/10.1016/S0169-2046(97)00033-9).
- 589 26. Puglis HJ, Boone MD. Effects of Terrestrial Buffer Zones on Amphibians on Golf Courses. *PLOS  
590 ONE*. 2012;7(6):e39590. doi: 10.1371/journal.pone.0039590.
- 591 27. Theobald DM. Development and Applications of a Comprehensive Land Use Classification  
592 and Map for the US. *PLOS ONE*. 2014;9(4):e94628. doi: 10.1371/journal.pone.0094628.
- 593 28. Hu T, Yang J, Li X, Gong P. Mapping Urban Land Use by Using Landsat Images and Open Social  
594 Data. *Remote Sensing*. 2016;8(2):151. PubMed PMID: doi:10.3390/rs8020151.
- 595 29. Li X, Liu X, Gong P. Integrating ensemble-urban cellular automata model with an uncertainty  
596 map to improve the performance of a single model. *International Journal of Geographical  
597 Information Science*. 2015;29(5):762-85. doi: 10.1080/13658816.2014.997237.
- 598 30. Tucker CJ. Red and photographic infrared linear combinations for monitoring vegetation.  
599 *Remote Sensing of Environment*. 1979;8(2):127-50. doi: [https://doi.org/10.1016/0034-  
600 4257\(79\)90013-0](https://doi.org/10.1016/0034-4257(79)90013-0).
- 601 31. Myneni RB, Hall FG, Sellers PJ, Marshak AL. The interpretation of spectral vegetation indexes.  
602 *IEEE Transactions on Geoscience and Remote Sensing*. 1995;33(2):481-6. doi:  
603 10.1109/TGRS.1995.8746029.
- 604 32. Vogt P, Riitters K, Estreguil C, Kozak J, G. Wade T, Wickham J. Mapping Spatial Patterns with  
605 Morphological Image Processing2007. 171-7 p.
- 606 33. Myers N, Mittermeier RA, Mittermeier CG, da Fonseca GAB, Kent J. Biodiversity hotspots for  
607 conservation priorities. *Nature*. 2000;403(6772):853-8. doi: 10.1038/35002501.
- 608 34. Kottek MG, Jürgen; Beck, Christoph; Rudolf, Bruno; Rubel, Franz. World Map of the Köppen-Geiger  
609 climate classification updated. *Meteorologische Zeitschrift*. 2006;15(3):259-63. doi:  
610 10.1127/0941-2948/2006/0130.
- 611 35. Hope PK, Drosowsky W, Nicholls N. Shifts in the synoptic systems influencing southwest  
612 Western Australia. *Climate Dynamics*. 2006;26(7):751-64. doi: 10.1007/s00382-006-0115-y.
- 613 36. Mittermeier R, Gil P, Hoffmann M, Pilgrim J, Brooks T, Mittermeier C, et al. Hotspots  
614 Revisited. *Earth's Biologically Richest and Most Endangered Terrestrial Ecoregions2004*.
- 615 37. Environmental Protection Act 1986, (1986).

- 616 38. Environment Protection and Biodiversity Conservation Act 1999 (EPBC Act), (1999).
- 617 39. Australia GoW. Bush Forever Volume 1: Policies, principles and processes. In: Protection  
618 MfPaDoE, editor. Perth, WA.2000a.
- 619 40. Australia GoW. Bush Forever Volume 2: Directory of Bush Forever sites. In: Protection  
620 MfPaDoE, editor. Perth, WA.2000b.
- 621 41. Environment Dot. Shrublands and Woodlands of the eastern Swan Coastal Plain in  
622 Community and Species Profile and Threats Database. In: Environment Dot, editor. Canberra.2016.
- 623 42. Dhakal SP. Glimpses of sustainability in Perth, Western Australia: Capturing and  
624 communicating the adaptive capacity of an activist group. *Consilience: The Journal of Sustainable  
625 Development*. 2014;11(1):167–82.
- 626 43. Song C, Woodcock CE, Seto KC, Lenney MP, Macomber SA. Classification and Change  
627 Detection Using Landsat TM Data: When and How to Correct Atmospheric Effects? *Remote Sensing  
628 of Environment*. 2001;75(2):230-44. doi: [https://doi.org/10.1016/S0034-4257\(00\)00169-3](https://doi.org/10.1016/S0034-4257(00)00169-3).
- 629 44. Cui L, Li G, Ren H, He L, Liao H, Ouyang N, et al. Assessment of atmospheric correction  
630 methods for historical Landsat TM images in the coastal zone: A case study in Jiangsu, China.  
631 *European Journal of Remote Sensing*. 2014;47(1):701-16. doi: 10.5721/EurRS20144740.
- 632 45. Lu D, Mausel P, Brondizio E, Moran E. Assessment of atmospheric correction methods for  
633 Landsat TM data applicable to Amazon basin LBA research. *International Journal of Remote Sensing*.  
634 2002;23(13):2651-71. doi: 10.1080/01431160110109642.
- 635 46. Gilmore S, Saleem A, Dewan A. Effectiveness of DOS (Dark-Object Subtraction) method and  
636 water index techniques to map wetlands in a rapidly urbanising megacity with Landsat 8 data. *CEUR  
637 Workshop Proceedings*. 2015;1323:100-8.
- 638 47. Nazeer M, Nichol J. Selection of atmospheric correction method and estimation of  
639 Chlorophyll-A (Chl-a) in coastal waters of Hong Kong. 3rd International Workshop on Earth  
640 Observation and Remote Sensing Applications, EORSA 2014 - Proceedings. 2014:374-8. doi:  
641 10.1109/EORSA.2014.6927916.
- 642 48. Yusuf FR, Santoso KB, Ningam MUL, Kamal M, Wicaksono P. Evaluation of atmospheric  
643 correction models and Landsat surface reflectance product in Daerah Istimewa Yogyakarta,  
644 Indonesia. *IOP Conference Series: Earth and Environmental Science*. 2018;169:012004. doi:  
645 10.1088/1755-1315/169/1/012004.
- 646 49. Dewi E, Trisakti B. COMPARING ATMOSPHERIC CORRECTION METHODS FOR LANDSAT OLI  
647 DATA. *International Journal of Remote Sensing and Earth Sciences (IJReSES)*. 2017;13:105. doi:  
648 10.30536/ij.ijreses.2016.v13.a2472.
- 649 50. Mohajane M, Essahlaoui A, Oudija F, Hafyani ME, Hmaid AE, Ouali AE, et al. Land Use/Land  
650 Cover (LULC) Using Landsat Data Series (MSS, TM, ETM+ and OLI) in Azrou Forest, in the Central  
651 Middle Atlas of Morocco. *Environments*. 2018;5(12):131. PubMed PMID:  
652 doi:10.3390/environments5120131.
- 653 51. Gu D, Gillespie A. Topographic Normalization of Landsat TM Images of Forest Based on  
654 Subpixel Sun–Canopy–Sensor Geometry. *Remote Sensing of Environment*. 1998;64(2):166-75. doi:  
655 [https://doi.org/10.1016/S0034-4257\(97\)00177-6](https://doi.org/10.1016/S0034-4257(97)00177-6).
- 656 52. Herring JWaD. Measuring Vegetation (NDVI & EVI) 2000. Available from:  
657 <https://earthobservatory.nasa.gov/features/MeasuringVegetation>.
- 658 53. Cha S-Y, Park C-H. The utilization of google earth images as reference data for the  
659 multitemporal land cover classification with MODIS data of North Korea.2007.
- 660 54. Pascual-Hortal L, Saura S. Comparison and development of new graph-based landscape  
661 connectivity indices: towards the prioritization of habitat patches and corridors for conservation.  
662 *Landscape Ecology*. 2006;21(7):959-67. doi: 10.1007/s10980-006-0013-z.
- 663 55. Saornil J, Gutiérrez J, Hernando A, Abril A, Sánchez B, Aparicio M. Structural connectivity as  
664 an indicator of species richness and landscape diversity in Castilla y León (Spain)2019. 286-97 p.
- 665 56. Wickham JD, Riitters KH, Wade TG, Vogt P. A national assessment of green infrastructure and  
666 change for the conterminous United States using morphological image processing. 2010.

667 57. Shi X, Qin M. Research on the Optimization of Regional Green Infrastructure Network.  
668 Sustainability. 2018;10(12):4649. PubMed PMID: doi:10.3390/su10124649.

669 58. MacLachlan A, Biggs E, Roberts G, Boruff B. Urban Growth Dynamics in Perth, Western  
670 Australia: Using Applied Remote Sensing for Sustainable Future Planning. Land. 2017;6(1):9. PubMed  
671 PMID: doi:10.3390/land6010009.

672 59. WorldPopulationReview. Perth Population 2019 2019 [21 February 2019]. Available from:  
673 <http://worldpopulationreview.com/world-cities/perth-population/>.

674 60. Commission WAP. Urban Growth Monitor Perth Metropolitan, Peel and Greater Bunbury  
675 Regions. In: WAPC WAPC, editor. Gordon Stephenson House 140 William Street Perth WA 6000: the  
676 Western Australian Planning Commission; 2019.

677 61. Authority MRP. The Corridor Plan for Perth. In: Authority MRP, editor. Perth, WA1970.

678 62. Development DoPaU. Metroplan: A planning strategy for the Perth Metropolitan Region. In:  
679 Development DoPaU, editor. Perth, WA.1990.

680 63. Bureau of Infrastructure TaREB. Population growth, jobs growth and commuting flows in  
681 Perth, . In: Transport Dola, editor. Canberra ACT 2010.

682 64. Department of Biodiversity CaA. A methodology for the evaluation of wetlands on the Swan  
683 Coastal Plain, draft prepared by the Wetlands Section of the Department of Biodiversity. In:  
684 Regulation CaAatUWBotDoWaE, editor. Perth, WA2017.

685 65. Saura S, Vogt P, Velázquez J, Hernando A, Tejera R. Key structural forest connectors can be  
686 identified by combining landscape spatial pattern and network analyses. Forest Ecology and  
687 Management. 2011;262(2):150-60. doi: <https://doi.org/10.1016/j.foreco.2011.03.017>.

688 66. Morjan CL, Rieseberg LH. How species evolve collectively: implications of gene flow and  
689 selection for the spread of advantageous alleles. Molecular ecology. 2004;13(6):1341-56. doi:  
690 10.1111/j.1365-294X.2004.02164.x. PubMed PMID: 15140081.

691 67. Green T. Perth's Urban Forest: A WA2.0 Project 2018.

692 68. Commission WAP. Perth and Peel @ 3.5 Million. In: Department of Planning GoWA, editor.  
693 Perth,WA, Australia2015.

694 69. Wickham J, Riitters K, Vogt P, Costanza J, Neale A. An inventory of continental U.S. terrestrial  
695 candidate ecological restoration areas based on landscape context2017.

696 70. Neylan J. Improving The Environmental Management of New South Wales Golf courses. In:  
697 NSW DoEaCC, editor. 59–61 Goulburn Street, Sydney, PO Box A290.

698 71. Deslauriers MR, Asgary A, Nazarnia N, Jaeger JAG. Implementing the connectivity of natural  
699 areas in cities as an indicator in the City Biodiversity Index (CBI). Ecological Indicators. 2017. doi:  
700 <https://doi.org/10.1016/j.ecolind.2017.02.028>.

701 72. Dobbs EK, Potter DA. Naturalized habitat on golf courses: source or sink for natural enemies  
702 and conservation biological control? Urban Ecosystems. 2016;19(2):899-914. doi: 10.1007/s11252-  
703 015-0521-1.

704 73. Saarikivi J, Tähtinen S, Malmberg S, Kotze DJ. Converting land into golf courses – effects on  
705 ground beetles (Coleoptera, Carabidae). Insect Conservation and Diversity. 2015;8(3):247-51. doi:  
706 10.1111/icad.12103.

707 74. Chester ET, Robson BJ. Anthropogenic refuges for freshwater biodiversity: Their ecological  
708 characteristics and management. Biological Conservation. 2013;166(Supplement C):64-75. doi:  
709 <https://doi.org/10.1016/j.biocon.2013.06.016>.

710 75. Saarikivi J, Idström L, Venn S, Niemelä J, Kotze DJ. Carabid beetle assemblages associated  
711 with urban golf courses in the greater Helsinki area. European Journal of Entomology.  
712 2010;107(4):553-61. PubMed PMID: 814377100.

713 76. Hudson M-AR, Bird DM. Recommendations for design and management of golf courses and  
714 green spaces based on surveys of breeding bird communities in Montreal. Landscape and Urban  
715 Planning. 2009;92(3):335-46. doi: <https://doi.org/10.1016/j.landurbplan.2009.05.017>.

716 77. Colding J, Lundberg J, Lundberg S, Andersson E. Golf courses and wetland fauna. Ecological  
717 Applications. 2009;19(6):1481-91. doi: 10.1890/07-2092.1.

- 718 78. Burgin S, Wotherspoon D. The potential for golf courses to support restoration of biodiversity  
719 for BioBanking offsets. *Urban Ecosystems*. 2009;12(2):145-55. doi: 10.1007/s11252-008-0076-5.
- 720 79. Tanner RA, Gange AC. Effects of golf courses on local biodiversity. *Landscape and Urban*  
721 *Planning*. 2005;71(2):137-46. doi: <https://doi.org/10.1016/j.landurbplan.2004.02.004>.
- 722 80. Angiuli E, Trianni G. Urban Mapping in Landsat Images Based on Normalized Difference  
723 Spectral Vector. *IEEE Geoscience and Remote Sensing Letters*. 2014;11(3):661-5. doi:  
724 10.1109/LGRS.2013.2274327.
- 725 81. Wu S-S, Qiu X, Usery EL, Wang L. Using Geometrical, Textural, and Contextual Information of  
726 Land Parcels for Classification of Detailed Urban Land Use. *Annals of the Association of American*  
727 *Geographers*. 2009;99(1):76-98. doi: 10.1080/00045600802459028.
- 728 82. Toole JL, Ulm M, González MC, Bauer D, editors. *Inferring land use from mobile phone*  
729 *activity*. Proceedings of the ACM SIGKDD international workshop on urban computing; 2012: ACM.

730

Formatted: Space Before: 0 pt, After: 0 pt, Line spacing: single

## Response to reviewers

### 1. Requirement from the Journal

| Comment                                                                                                                                                                                                                                                                                                                                                                                                                                                                                                                                                                                                                                                                                                                                                                                                                                                                                                                                                                                                                                                                                                                                                                                                                                                                                                                                                                                                                                                                                                                                                                                                                                                                                                                                                                                                                                                                                                                                                                                                                                                                                                                                                                                                                                                                                      | Response                                                                                                                                                                                                                               |
|----------------------------------------------------------------------------------------------------------------------------------------------------------------------------------------------------------------------------------------------------------------------------------------------------------------------------------------------------------------------------------------------------------------------------------------------------------------------------------------------------------------------------------------------------------------------------------------------------------------------------------------------------------------------------------------------------------------------------------------------------------------------------------------------------------------------------------------------------------------------------------------------------------------------------------------------------------------------------------------------------------------------------------------------------------------------------------------------------------------------------------------------------------------------------------------------------------------------------------------------------------------------------------------------------------------------------------------------------------------------------------------------------------------------------------------------------------------------------------------------------------------------------------------------------------------------------------------------------------------------------------------------------------------------------------------------------------------------------------------------------------------------------------------------------------------------------------------------------------------------------------------------------------------------------------------------------------------------------------------------------------------------------------------------------------------------------------------------------------------------------------------------------------------------------------------------------------------------------------------------------------------------------------------------|----------------------------------------------------------------------------------------------------------------------------------------------------------------------------------------------------------------------------------------|
| <p>Please ensure that your manuscript meets PLOS ONE's style requirements, including those for file naming. The PLOS ONE style templates can be found at</p>                                                                                                                                                                                                                                                                                                                                                                                                                                                                                                                                                                                                                                                                                                                                                                                                                                                                                                                                                                                                                                                                                                                                                                                                                                                                                                                                                                                                                                                                                                                                                                                                                                                                                                                                                                                                                                                                                                                                                                                                                                                                                                                                 |                                                                                                                                                                                                                                        |
| <ul style="list-style-type: none"> <li>• We note that Figure 1 in your submission contain map/satellite images which may be copyrighted. All PLOS content is published under the Creative Commons Attribution License (CC BY 4.0), which means that the manuscript, images, and Supporting Information files will be freely available online, and any third party is permitted to access, download, copy, distribute, and use these materials in any way, even commercially, with proper attribution. For these reasons, we cannot publish previously copyrighted maps or satellite images created using proprietary data, such as Google software (Google Maps, Street View, and Earth).</li> <li>• We require you to either (1) present written permission from the copyright holder to publish these figures specifically under the CC BY 4.0 license, or (2) remove the figures from your submission:</li> </ul> <p>(1). You may seek permission from the original copyright holder of Figure 1 to publish the content specifically under the CC BY 4.0 license.</p> <p>(2). If you are unable to obtain permission from the original copyright holder to publish these figures under the CC BY 4.0 license or if the copyright holder's requirements are incompatible with the CC BY 4.0 license, please either i) remove the figure or ii) supply a replacement figure that complies with the CC BY 4.0 license. Please check copyright information on all replacement figures and update the figure caption with source information. If applicable, please specify in the figure caption text when a figure is similar but not identical to the original image and is therefore for illustrative purposes only.</p> <p>The following resources for replacing copyrighted map figures may be helpful:</p> <p>USGS National Map Viewer (public domain): <a href="http://viewer.nationalmap.gov/viewer/">http://viewer.nationalmap.gov/viewer/</a></p> <p>The Gateway to Astronaut Photography of Earth (public domain): <a href="http://eol.jsc.nasa.gov/sseop/clickmap/">http://eol.jsc.nasa.gov/sseop/clickmap/</a></p> <p>Maps at the CIA (public domain): <a href="https://www.cia.gov/library/publications/the-world-">https://www.cia.gov/library/publications/the-world-</a></p> | <p>We have replaced the background of figure 1 with a map (Landsat 8) from USGS EROS (Earth Resources Observatory and Science (EROS) Center) in the public domain: <a href="http://eros.usgs.gov/">http://eros.usgs.gov/</a><br/>#</p> |

[factbook/index.html](#) and <https://www.cia.gov/library/publications/cia-maps-publications/index.html>  
 NASA Earth Observatory (public domain): <http://earthobservatory.nasa.gov/>  
 Landsat: <http://landsat.visibleearth.nasa.gov/>  
 USGS EROS (Earth Resources Observatory and Science (EROS) Center) (public domain): <http://eros.usgs.gov/#>  
 Natural Earth (public domain): <http://www.naturalearthdata.com/>

We note that one or more of the authors are employed by a commercial company: ArborCarbon Pty Ltd

1. Please provide an amended Funding Statement declaring this commercial affiliation, as well as a statement regarding the Role of Funders in your study. If the funding organization did not play a role in the study design, data collection and analysis, decision to publish, or preparation of the manuscript and only provided financial support in the form of authors' salaries and/or research materials, please review your statements relating to the author contributions, and ensure you have specifically and accurately indicated the role(s) that these authors had in your study. You can update author roles in the Author Contributions section of the online submission form.

Please also include the following statement within your amended Funding Statement.

“The funder provided support in the form of salaries for authors [insert relevant initials], but did not have any additional role in the study design, data collection and analysis, decision to publish, or preparation of the manuscript. The specific roles of these authors are articulated in the ‘author contributions’ section.”

If your commercial affiliation did play a role in your study, please state and explain this role within your updated Funding Statement.

**Funding Statement**

Ms Thu Nguyen received scholarships from the Vietnam International Education Department (VIED) and Murdoch University to pursue her PhD degree at Murdoch University where this study was carried out. VIED did not play a role in the study design, data collection and analysis, decision to publish, or preparation of the manuscript.

Murdoch University provided support to Professors Bernard Dell and Richard Harper in the form of salaries and provided support to Ms. Thu Nguyen in the form of facilities, but did not play a role in the study design, data collection and analysis, decision to publish, or preparation of the manuscript.

|                                                                                                                                                                                                                                                           |                                                                                                                                                                                                                                                                                                                                                                                                                                                                                                                                                                                                                                                                                                                      |
|-----------------------------------------------------------------------------------------------------------------------------------------------------------------------------------------------------------------------------------------------------------|----------------------------------------------------------------------------------------------------------------------------------------------------------------------------------------------------------------------------------------------------------------------------------------------------------------------------------------------------------------------------------------------------------------------------------------------------------------------------------------------------------------------------------------------------------------------------------------------------------------------------------------------------------------------------------------------------------------------|
|                                                                                                                                                                                                                                                           | <p><u>ArborCarbon provided financial support for A/Professor Paul Barber, but did not have any additional role in the study design, data collection and analysis, decision to publish, or preparation of the manuscript. The specific roles of these authors are articulated in the 'author contributions' section.</u></p> <p><del>This project was funded by Murdoch University. The senior author Ms Thu Nguyen receives a joint scholarship from the Vietnam International Education Department and Murdoch University. Murdoch University provides support to Professors Bernard Dell and Richard Harper in the form of salaries. ArborCarbon does not provide any financial support for the project.</del></p> |
| <p>2. Please also provide an updated Competing Interests Statement declaring this commercial affiliation along with any other relevant declarations relating to employment, consultancy, patents, products in development, or marketed products, etc.</p> | <p><b>Competing Interests Statement</b><br/>A/Prof. Paul Barber is employed by the commercial entity</p>                                                                                                                                                                                                                                                                                                                                                                                                                                                                                                                                                                                                             |



Within your Competing Interests Statement, please confirm that this commercial affiliation does not alter your adherence to all PLOS ONE policies on sharing data and materials by including the following statement: "This does not alter our adherence to PLOS ONE policies on sharing data and materials." (as detailed online in our guide for authors <http://journals.plos.org/plosone/s/competing-interests>) . If this adherence statement is not accurate and there are restrictions on sharing of data and/or materials, please state these. Please note that we cannot proceed with consideration of your article until this information has been declared.

Please include both an updated Funding Statement and Competing Interests Statement in your cover letter. We will change the online submission form on your behalf.

Please know it is PLOS ONE policy for corresponding authors to declare, on behalf of all authors, all potential competing interests for the purposes of transparency. PLOS defines a competing interest as anything that interferes with, or could reasonably be perceived as interfering with, the full and objective presentation, peer review, editorial decision-making, or publication of research or non-research articles submitted to one of the journals. Competing interests can be financial or non-financial, professional, or personal. Competing interests can arise in relationship to an organization or another person. Please follow this link to our website for more details on competing interests: <http://journals.plos.org/plosone/s/competing-interests>

**Competing Interests Statement:**

ArborCarbon who provides in-kind support only through the employment of the co-author A/Prof. Paul Barber and access to facilities, equipment and software. This commercial affiliation does not alter our adherence to all PLOS ONE policies in sharing data and materials. Profs Dell, Profs Harper, and other authors have no competing interests.

**2. Reviewer #1**

| Comment                                                                                                                                      | Response                                                                                                                                                                                                                                                                                                                                                                                                                                                                                                                                                                                                                                                                                                |
|----------------------------------------------------------------------------------------------------------------------------------------------|---------------------------------------------------------------------------------------------------------------------------------------------------------------------------------------------------------------------------------------------------------------------------------------------------------------------------------------------------------------------------------------------------------------------------------------------------------------------------------------------------------------------------------------------------------------------------------------------------------------------------------------------------------------------------------------------------------|
| Page 1, row 26 (abstract): consider being specific (last three decades, 1988-2018)                                                           | Agreed and edited:<br>"last three decades, 1988-2018"                                                                                                                                                                                                                                                                                                                                                                                                                                                                                                                                                                                                                                                   |
| Page 1, row 29 and 30 (abstract): I wonder if due to their specific land use golf course are somewhat non conductive to habitat suitability? | We have clarified this in the text. In Australia and other parts of the world, many golf courses include significant non-play areas, which comprise plantations or natural vegetation. Those are shown to be suitable for habitat of wildlife and biodiversity in previous studies and government policies:<br><ul style="list-style-type: none"> <li>- Hodgkison, S. C., Hero, J. M., &amp; Warnken, J. (2007). The conservation value of suburban golf courses in a rapidly urbanising region of Australia. <i>Landscape and Urban Planning</i>, 79(3), 323-337.<br/>doi:<a href="https://doi.org/10.1016/j.landurbplan.2006.03.009">https://doi.org/10.1016/j.landurbplan.2006.03.009</a></li> </ul> |

|                                                                                                                                                                                                                                                                                                |                                                                                                                                                                                                                                                                                                                                                                                                                                                                                                                                                                                         |
|------------------------------------------------------------------------------------------------------------------------------------------------------------------------------------------------------------------------------------------------------------------------------------------------|-----------------------------------------------------------------------------------------------------------------------------------------------------------------------------------------------------------------------------------------------------------------------------------------------------------------------------------------------------------------------------------------------------------------------------------------------------------------------------------------------------------------------------------------------------------------------------------------|
|                                                                                                                                                                                                                                                                                                | <ul style="list-style-type: none"> <li>- Hudson, M.-A. R., &amp; Bird, D. M. (2009). Recommendations for design and management of golf courses and green spaces based on surveys of breeding bird communities in Montreal. <i>Landscape and Urban Planning</i>, 92(3), 335-346.</li> <li>- Tanner, R. A., &amp; Gange, A. C. (2005). Effects of golf courses on local biodiversity. <i>Landscape and Urban Planning</i>, 71(2), 137-146.<br/>doi:<a href="https://doi.org/10.1016/j.landurbplan.2004.02.004">https://doi.org/10.1016/j.landurbplan.2004.02.004</a></li> </ul>           |
| <p>I am not too sure about your last statement in the Abstract that suggest "we need to consider before clearing for urban development". An already developed area becomes a fair game in my opinion and you may need to qualify that statement. Will check how you substantiated this?</p>    | <p>We have edited this section of the Abstract to:</p> <p>“Our findings suggest that for future urban expansion, urban planning needs to more carefully consider factors that affect connectivity in the landscape such as preserving functional forest remnants and encouraging reforestation.”</p> <p>This takes into account the circumstances where urban areas expand into forested areas, or where reforestation occurs on previously deforested land. Our paper clearly shows that remnant forests dispersed across urban areas are essential for biodiversity conservation.</p> |
| <p>Page 2, row 44 (Introduction): suggesting of replace “delivered” by “derived:</p>                                                                                                                                                                                                           | <p>Agreed and edited</p>                                                                                                                                                                                                                                                                                                                                                                                                                                                                                                                                                                |
| <p>Page 2, row 47 (Introduction):<br/>While there are few publications about these topics, most of them tend to be rather tenuous at best.<br/>The general idea of large urban environments being non conducive to healthy lifestyle is well founded but maybe beyond the amount of green?</p> | <p>This is now deleted</p>                                                                                                                                                                                                                                                                                                                                                                                                                                                                                                                                                              |
| <p>Page 2, row 49 (Introduction):<br/>“natural disasters”<br/>Floods for example?<br/><br/>But they me be conducive to other risks and hazards too?</p>                                                                                                                                        | <p>Have modified:<br/>“some kinds of natural disaster for example food”</p>                                                                                                                                                                                                                                                                                                                                                                                                                                                                                                             |
| <p>Page 2, row 55 (Introduction):<br/>“Fragmentation”: This is almost always inevitable</p>                                                                                                                                                                                                    | <p>Have edited:<br/>Therefore, urban development that requires clearing of vegetation, due to reduction in vegetation cover, habitat loss and fragmentation is a threat to biodiversity</p>                                                                                                                                                                                                                                                                                                                                                                                             |

|                                                                                                                                                                                                                                                                                                                                         |                                                                                                                                                                                                                                                                                                                                                                                                                                                                                                                                                                                                                                                                                                                                                                                                                                                                                                                                                                                                                                                                                                                                                                                                                                                                                                                                                                                                                                                                                                                                                                                                                                                                                                                                                                                                                                                                                                                                                                                                                                                                                                                                                                                                                                                                                                                                                                                                                                                |
|-----------------------------------------------------------------------------------------------------------------------------------------------------------------------------------------------------------------------------------------------------------------------------------------------------------------------------------------|------------------------------------------------------------------------------------------------------------------------------------------------------------------------------------------------------------------------------------------------------------------------------------------------------------------------------------------------------------------------------------------------------------------------------------------------------------------------------------------------------------------------------------------------------------------------------------------------------------------------------------------------------------------------------------------------------------------------------------------------------------------------------------------------------------------------------------------------------------------------------------------------------------------------------------------------------------------------------------------------------------------------------------------------------------------------------------------------------------------------------------------------------------------------------------------------------------------------------------------------------------------------------------------------------------------------------------------------------------------------------------------------------------------------------------------------------------------------------------------------------------------------------------------------------------------------------------------------------------------------------------------------------------------------------------------------------------------------------------------------------------------------------------------------------------------------------------------------------------------------------------------------------------------------------------------------------------------------------------------------------------------------------------------------------------------------------------------------------------------------------------------------------------------------------------------------------------------------------------------------------------------------------------------------------------------------------------------------------------------------------------------------------------------------------------------------|
| <p>Page 3, row 84: REF 29 is not correct? Look for Tucker, Huete, Myneni, Prince, for an NDVI reference</p>                                                                                                                                                                                                                             | <p>The Reference: 29 is deleted and the reference Tucker 1979 and Myneni et al 1996 are now added for NDVI analysis.</p>                                                                                                                                                                                                                                                                                                                                                                                                                                                                                                                                                                                                                                                                                                                                                                                                                                                                                                                                                                                                                                                                                                                                                                                                                                                                                                                                                                                                                                                                                                                                                                                                                                                                                                                                                                                                                                                                                                                                                                                                                                                                                                                                                                                                                                                                                                                       |
| <p>Page 3, row 88: "Then"</p>                                                                                                                                                                                                                                                                                                           | <p>Deleted</p>                                                                                                                                                                                                                                                                                                                                                                                                                                                                                                                                                                                                                                                                                                                                                                                                                                                                                                                                                                                                                                                                                                                                                                                                                                                                                                                                                                                                                                                                                                                                                                                                                                                                                                                                                                                                                                                                                                                                                                                                                                                                                                                                                                                                                                                                                                                                                                                                                                 |
| <p>Page 4, row 104 "Study area": You need to expand this section a bit more to create a anchor for the motivations and objectives?<br/>Not sure what else to say, but things like what is so special besides the nmr of golf courses? how it is biodiverse? what do you hope to achieve? are there any plans to change things? etc.</p> | <p>- In the Introduction, the background of the study area has been involved the information about why we choose this study area. Because it lies within a rapidly urbanizing biodiversity hotspot in Australia and has important role in regional biodiversity connectivity, which is linked to the aims, motivation, objectives of this study.</p> <p>- Additional text added to the study area section:</p> <p>"The study area belongs to the Perth Metropolitan region covering four sub-regions (North West, Middle Central, Inner Central and South West). Perth has a Mediterranean-type temperate climate with a hot and dry summer, and a cold and rainy season occurring between May and October [32]. Under future climate-change scenarios, this area is projected to experience a lower annual rainfall [33].</p> <p>Perth belongs to the Australia's southwest corner, which is recognized as a global biodiversity "hotspot" with outstanding natural environments. Our study area occurs on the Swan Coastal Plain which is part of the southwest of Australia which in turn has the highest concentration of rare and endangered species on the entire continent (at least 1,500 endemic species). More than 6,000 species of native plants and 100 native mammals, birds, frogs and reptiles occur in this region, making it a biodiversity "hotspot" [31, 34].</p> <p>Perth has retained a significant area of natural vegetation which has conservation significance thanks to the introduction of legislation and policies aimed primarily at protecting biophysical environmental values. This includes the Western Australian Environmental Protection Act 1986 [35]; the Federal Government's Environment Protection and Biodiversity Conservation Act 1999 [36]; and more recently, Bush Forever [37, 38], a policy which took a whole-of-government approach to identify and protect biologically significant bushland and wetlands within the Perth metropolitan area. However, Perth has experienced extensive urban development since the 1980s [39]. The expansive growth of the Perth metropolitan footprint has contributed to the loss of biodiversity, together with the ecosystem services provided by natural areas. Together with urbanization, the golf industry has expanded contributing to a growing proportion of Perth's urban green space with 34 golf courses in the study area (Figure 1). "</p> |

|                                                                                                                                                                                                                                                                                                                                                                                                                                                                                                             |                                                                                                                                                                                                                                                                                                                                                                                                                                                                                                                                                                                                                                                                                                                                                                                                                                                                                                                                                                                                                                                                                                                                                                                                                                                                            |
|-------------------------------------------------------------------------------------------------------------------------------------------------------------------------------------------------------------------------------------------------------------------------------------------------------------------------------------------------------------------------------------------------------------------------------------------------------------------------------------------------------------|----------------------------------------------------------------------------------------------------------------------------------------------------------------------------------------------------------------------------------------------------------------------------------------------------------------------------------------------------------------------------------------------------------------------------------------------------------------------------------------------------------------------------------------------------------------------------------------------------------------------------------------------------------------------------------------------------------------------------------------------------------------------------------------------------------------------------------------------------------------------------------------------------------------------------------------------------------------------------------------------------------------------------------------------------------------------------------------------------------------------------------------------------------------------------------------------------------------------------------------------------------------------------|
| <p>Page 4, row 108: what does unsustainable mean here?</p>                                                                                                                                                                                                                                                                                                                                                                                                                                                  | <p>“ unsustainable rate” is now deleted and the sentence has been edited.</p>                                                                                                                                                                                                                                                                                                                                                                                                                                                                                                                                                                                                                                                                                                                                                                                                                                                                                                                                                                                                                                                                                                                                                                                              |
| <p>Page 4, row 123: Please correct, it is the Earth Resources Observation and Science Center (EROS).</p>                                                                                                                                                                                                                                                                                                                                                                                                    | <p>It is now corrected</p>                                                                                                                                                                                                                                                                                                                                                                                                                                                                                                                                                                                                                                                                                                                                                                                                                                                                                                                                                                                                                                                                                                                                                                                                                                                 |
| <p>Page 4 and 5: <b>Landsat data and pre-processing</b><br/> There are issues with the classification based on images from the month of December only (Summer). There was little in the way of what exact dates, what data, how did you remove clouds, etc... This is critical since it will impact the change detection which is based on NDVI, which is very sensitive to noise in the data and the time the data came from? You will need to elaborate on your exact methods and data analysis here.</p> | <p>More details of the input data sets for the classification and analysis are added to the text . We chose all the free cloud images or at least cloud-free at the study area, so there is no requirement for removing cloud.</p>                                                                                                                                                                                                                                                                                                                                                                                                                                                                                                                                                                                                                                                                                                                                                                                                                                                                                                                                                                                                                                         |
| <p>Page 5, rows 127-133: USGS now distributes fully research ready data (fully atm. corrected using standard and sophisticated methods that surpasses DOS)<br/> There was hardly any useful information on how the Atm. Correction was carried. You need to clarify this further so readers can replicate and or understand better.</p>                                                                                                                                                                     | <p>The best atmospheric correction varies on each object (Yusuf et al. 2018). We used dark object subtraction (DOS) to correct atmospheric scattering as this method is still approved appropriate and reliable one, which is consistent with previous studies:<br/> Mohajane, M., Essahlaoui, A., Oudija, F., Hafyani, M. E., Hmaid, A. E., Ouali, A. E., . . . Teodoro, A. C. (2018). Land Use/Land Cover (LULC) Using Landsat Data Series (MSS, TM, ETM+ and OLI) in Azrou Forest, in the Central Middle Atlas of Morocco. <i>Environments</i>, 5(12), 131.<br/><br/> Dewi, E., &amp; Trisakti, B. (2017). COMPARING ATMOSPHERIC CORRECTION METHODS FOR LANDSAT OLI DATA. <i>International Journal of Remote Sensing and Earth Sciences (IJReSES)</i>, 13, 105. doi:10.30536/ijreses.2016.v13.a2472<br/> Cui, L., Li, G., Ren, H., He, L., Liao, H., Ouyang, N., &amp; Zhang, Y. (2014). Assessment of atmospheric correction methods for historical Landsat TM images in the coastal zone: A case study in Jiangsu, China. <i>European Journal of Remote Sensing</i>, 47(1), 701-716. doi:10.5721/EuJRS20144740<br/><br/> Gilmore, S., Saleem, A., &amp; Dewan, A. (2015). Effectiveness of DOS (Dark-Object Subtraction) method and water index techniques to map</p> |

|                                                                                                                                                                        |                                                                                                                                                                                                                                                                                                                                                                                                                                                                                                                                                                                                                                                                                                                                                                                            |
|------------------------------------------------------------------------------------------------------------------------------------------------------------------------|--------------------------------------------------------------------------------------------------------------------------------------------------------------------------------------------------------------------------------------------------------------------------------------------------------------------------------------------------------------------------------------------------------------------------------------------------------------------------------------------------------------------------------------------------------------------------------------------------------------------------------------------------------------------------------------------------------------------------------------------------------------------------------------------|
|                                                                                                                                                                        | <p>wetlands in a rapidly urbanising megacity with Landsat 8 data. <i>CEUR Workshop Proceedings, 1323</i>, 100-108.</p> <p>Nazeer, M., &amp; Nichol, J. (2014). Selection of atmospheric correction method and estimation of Chlorophyll-A (Chl-a) in coastal waters of Hong Kong. <i>3rd International Workshop on Earth Observation and Remote Sensing Applications, EORSA 2014 - Proceedings</i>, 374-378. doi:10.1109/EORSA.2014.6927916</p> <p>Yusuf, F. R., Santoso, K. B., Ningam, M. U. L., Kamal, M., &amp; Wicaksono, P. (2018). Evaluation of atmospheric correction models and Landsat surface reflectance product in Daerah Istimewa Yogyakarta, Indonesia. <i>IOP Conference Series: Earth and Environmental Science, 169</i>, 012004. doi:10.1088/1755-1315/169/1/012004</p> |
| Page 5, row 138: Reword the caption. This is a processing pipelines or flowchart.                                                                                      | We use the term flowchart as we suggest it is more appropriate                                                                                                                                                                                                                                                                                                                                                                                                                                                                                                                                                                                                                                                                                                                             |
| Page 5, row 140: Why here?                                                                                                                                             | It is now deleted                                                                                                                                                                                                                                                                                                                                                                                                                                                                                                                                                                                                                                                                                                                                                                          |
| Page 5, row 149: For Landsat we usually list the actual band numbers to avoid any confusion?                                                                           | The equation is edited                                                                                                                                                                                                                                                                                                                                                                                                                                                                                                                                                                                                                                                                                                                                                                     |
| Page 6, row 153: The first reason for high NDVI is that RED is consumed by chlorophyll to drive photosynthesis.                                                        | This is now edited                                                                                                                                                                                                                                                                                                                                                                                                                                                                                                                                                                                                                                                                                                                                                                         |
| Page 6, row 156: “three classes”, that are?                                                                                                                            | Three classes are added                                                                                                                                                                                                                                                                                                                                                                                                                                                                                                                                                                                                                                                                                                                                                                    |
| Page 8, row 212: Grammar error                                                                                                                                         | It is now corrected                                                                                                                                                                                                                                                                                                                                                                                                                                                                                                                                                                                                                                                                                                                                                                        |
| Page 8, row 230: where did this nmbr come from?                                                                                                                        | The number is now corrected                                                                                                                                                                                                                                                                                                                                                                                                                                                                                                                                                                                                                                                                                                                                                                |
| I suggest you improve the captions of all figures - Elaborate on caption and make them read better?                                                                    | We have edited the captions                                                                                                                                                                                                                                                                                                                                                                                                                                                                                                                                                                                                                                                                                                                                                                |
| Page 10, row 243, suggestion f or the title of table 3.                                                                                                                | It is now edited                                                                                                                                                                                                                                                                                                                                                                                                                                                                                                                                                                                                                                                                                                                                                                           |
| The concept of vegetation cover gain in urbanized areas is a bit of a misnomer, as how would that happen? is it urban abandonment? or other mechanism? Please clarify. | We have added text to describe this in the first paragraph of Sect 4.1.                                                                                                                                                                                                                                                                                                                                                                                                                                                                                                                                                                                                                                                                                                                    |
| For the sake of clarity and completeness I highly suggest you define these terms (Core, Bridge, etc.) and what they capture                                            | Agreed and all of those terms are redefined in Table 1 in the Methods section.                                                                                                                                                                                                                                                                                                                                                                                                                                                                                                                                                                                                                                                                                                             |

|                                                                                                                                                                                                                                  |                                                                                                                                                                                                                                                                                                                                                                                                                                                                                                                                                                                                       |
|----------------------------------------------------------------------------------------------------------------------------------------------------------------------------------------------------------------------------------|-------------------------------------------------------------------------------------------------------------------------------------------------------------------------------------------------------------------------------------------------------------------------------------------------------------------------------------------------------------------------------------------------------------------------------------------------------------------------------------------------------------------------------------------------------------------------------------------------------|
| and mean?<br><br>The reference is great but forces the reader to read another paper, where a simple short definition may suffice.                                                                                                |                                                                                                                                                                                                                                                                                                                                                                                                                                                                                                                                                                                                       |
| I also find the reference to " Golf courses" as a fully functional and reliable habitats a bit confusing considering their high traffic and human impacts? Please clarify.                                                       | We have added to the Introduction: Golf courses are established for recreational purposes. The whole area of golf courses are a mix of bushland, fairways and infrastructure. Though they are not fully ecologically functional as with a natural parks.<br>Several studies investigated the condition of vegetation inside the golf courses and indicated that those natural areas are significantly important to biodiversity conservation. Therefore, together with the natural reserves, golf courses can play some roles as off-reserve sites for biodiversity conservation in urban landscapes. |
| Page 10, 256: Is it necessary to abbreviate here?                                                                                                                                                                                | Yes it is, we did abbreviate “Vegetation cover area (VCA)” for short title of Table 5.                                                                                                                                                                                                                                                                                                                                                                                                                                                                                                                |
| Page 12, row 293: These terms must be defined for clarity.                                                                                                                                                                       | I have added the definition of those terms in the new Table 1                                                                                                                                                                                                                                                                                                                                                                                                                                                                                                                                         |
| Page 13, row 315: “74 to 92 ha”:<br>Thousand?                                                                                                                                                                                    | Agreed and corrected                                                                                                                                                                                                                                                                                                                                                                                                                                                                                                                                                                                  |
| Page 14, row 342: “Cores and bridges” this needs to be defined for the sake of a general audience.                                                                                                                               | Agreed and all of those terms are redefined in the table ... in the Method section.                                                                                                                                                                                                                                                                                                                                                                                                                                                                                                                   |
| Page 15, row 368: “2075”: That is assuming an ever increasing numbers?                                                                                                                                                           | Agreed.                                                                                                                                                                                                                                                                                                                                                                                                                                                                                                                                                                                               |
| Page 16, Row 392-397: I wonder due to their specific and heavy use could golf course really be paralleled to natural veg. cover?                                                                                                 | As mentioned above, previous studies about the golf courses in Australia and other counties have shown that the non-playing areas in many golf courses are the planted vegetation or natural bushes, which are suitable as habitats in urban landscapes.                                                                                                                                                                                                                                                                                                                                              |
| Generally the manuscript is well written and easy to read and understand, but it lacked critical technical information and clarift in some key areas (Data analysis, Habitat analysis). I suggest you address these shortcoming. | Agreed, We have edited and bolstered the data analysis and habitat analysis components.                                                                                                                                                                                                                                                                                                                                                                                                                                                                                                               |

### 3. Reviewer #2

| Comment                                                                        | Response |
|--------------------------------------------------------------------------------|----------|
| This study do not intend to explain the 'dynamic'- nets effect of many factors | Agreed.  |

|                                                                                                                                                                                                                                                                                                                   |                                                                                                       |
|-------------------------------------------------------------------------------------------------------------------------------------------------------------------------------------------------------------------------------------------------------------------------------------------------------------------|-------------------------------------------------------------------------------------------------------|
| such as climate, abiotic environment, biotic interaction, disturbance history etc. In vegetation cover over Perth metropolitan, but seek to describe 'only' the spatio-temporal land use change pattern associated with urbanization in the area. Hence, the title should be reframe to capture only this aspect. | The title is edited: “Vegetation trends associated with urban development: The role of golf courses.” |
|-------------------------------------------------------------------------------------------------------------------------------------------------------------------------------------------------------------------------------------------------------------------------------------------------------------------|-------------------------------------------------------------------------------------------------------|

#### 4. Reviewer #3

| Comment                                                                                             | Response                   |
|-----------------------------------------------------------------------------------------------------|----------------------------|
| Kindly improve the map resolution of all figures                                                    | It is improved             |
| The accuracy assessment of the classification is not exit the manuscript, it is needed to be added. | It is added in the table 3 |
| Kindly add the lat/long, scale, and north arrow on the border of layout.                            | It is added                |

#### 5. Reviewer #4

| Comment                                                                                                                                                                                                                                              | Response                                                          |
|------------------------------------------------------------------------------------------------------------------------------------------------------------------------------------------------------------------------------------------------------|-------------------------------------------------------------------|
| Golf courses have potential in habitat but to think they are superior in habitat protection than natural areas is the problem I have. I also think you kept moving forward and back on the focus of the study. Please refer to my comments attached. | Agreed. See response to Reviewer 1, above.                        |
| Page 1, line 58: “urban matrix”: I guess you mean urban vegetation matrix                                                                                                                                                                            | Agreed and edited                                                 |
| Line 206 “in their surrounding regions.”: Have to be clear on the specific surrounding regions. Natural or builtup                                                                                                                                   | Changed from “surrounding regions ” to “surrounding green spaces” |
| Line 210, 212-213, “Land use”: There is differences between land use and land cover. What you have is cover rather than use                                                                                                                          | Agreed and edited                                                 |
| Line 214-215, “However, the urban                                                                                                                                                                                                                    | Agreed and edited: increased 10% from 1988 to 2018                |

|                                                                                                                                                                                                                                                                                                                                                                                                                                                                                                                                                                                                        |                                                                                                                                                                                                                                                                                                                                                                                                                                                                                                                                                                                                                                            |
|--------------------------------------------------------------------------------------------------------------------------------------------------------------------------------------------------------------------------------------------------------------------------------------------------------------------------------------------------------------------------------------------------------------------------------------------------------------------------------------------------------------------------------------------------------------------------------------------------------|--------------------------------------------------------------------------------------------------------------------------------------------------------------------------------------------------------------------------------------------------------------------------------------------------------------------------------------------------------------------------------------------------------------------------------------------------------------------------------------------------------------------------------------------------------------------------------------------------------------------------------------------|
| <p>footprint of built up and bare land area had increased 10% by 2018.<br/>215”: Increased from 1988 or 1998</p>                                                                                                                                                                                                                                                                                                                                                                                                                                                                                       |                                                                                                                                                                                                                                                                                                                                                                                                                                                                                                                                                                                                                                            |
| <p>Line 218-219, “Accuracy assessment”: It should come first before the results so we know the results we are dealing with</p>                                                                                                                                                                                                                                                                                                                                                                                                                                                                         | <p>Agreed and edited</p>                                                                                                                                                                                                                                                                                                                                                                                                                                                                                                                                                                                                                   |
| <p>Line 226, Figure 3: After seeing Figure 3. Am a bit sceptic about the results for the Golf Course? Reflecting back on the methodology used to derive Golf Course in line 180-183. Do you think Landsat image of 30*30m or 15*15 for Landsat 8 did a good job of classifying a small zones like the park. There is generalisation when the study area is big which is acceptable but when zoomed in to a local scale the generalisation will be too high. You can try mapping it with the google earth but the problem is the golf courses are too many. So try mapping a few to make your point</p> | <p>We have added a new figure 4, which shows the details of underlying Landsat data and classification at the fine scale for one of the golf courses.</p>                                                                                                                                                                                                                                                                                                                                                                                                                                                                                  |
| <p>Line 253 “Two types of landscape that .....”: types of landscape matrix or index?</p>                                                                                                                                                                                                                                                                                                                                                                                                                                                                                                               | <p>Agreed and edited to “ two MSPA classes”</p>                                                                                                                                                                                                                                                                                                                                                                                                                                                                                                                                                                                            |
| <p>Line 306 – 307 “not address the issues of vegetation dynamics, nor the biodiversity and structure of the vegetation and habitat connectivity”: If the work did not then what is the golf course play a part in biodiversity connectivity meant for. Is biodiversity connectivity and habitat connectivity highly mutually exclusive?</p>                                                                                                                                                                                                                                                            | <p>Agreed and edited: the writing was not clear here and may have caused the confusion: <del>;</del><br/>A previous study has documented the increase in the urban footprint of Perth using multi-temporal urban expansion statistics derived from satellite imagery (MacLachlan, Biggs, Roberts, &amp; Boruff, 2017); However, their work did not address the issues of vegetation dynamics, nor the biodiversity and structure of the vegetation and habitat connectivity in the Perth Metropolitan Region. Therefore, our study has worked to fill this gap. We have now pointed this out in the first paragraph of the Discussion.</p> |
| <p>Line 343-345, “The reduction of these areas in our study indicates the high impact of urbanization on habitat connectivity<br/>344<br/>connectivity<br/>345”:<br/>How do you reconcile line 344 to 345 and 306-307?</p>                                                                                                                                                                                                                                                                                                                                                                             | <p>Agreed and edited to remove this issue:<br/>“As only cores (the stepping stones between forest habitat patches) and bridges (the structural corridors to link core areas) can contribute to the connectivity between the habitat areas in the landscape [63], the reduction of these areas in Perth associated with urbanization throughout the time indicates the high impact of urban development on habitat connectivity..</p>                                                                                                                                                                                                       |
